# Supplementary material for: A New Double-Stranded RNA Mycovirus in Cryphonectria naterciae Is Able to Cross the Species Barrier and Is Deleterious to a New Host
Source: MDPI journal article supplement (doi:10.3390/jof7100861), 2021-10-14
Supplement: s1 [file s1]

# A New Double-Stranded RNA Mycovirus in *Cryphonectria naterciae* Is Able to Cross the Species

## Barrier and Is Deleterious to a New Host

Journal of Fungi, 2021

C. Cornejo, S. Hisano, H. Bragança, N. Suzuki, D. Rigling

\*\*\*\*\*

### Content:

|    |                                                                                          |       |
|----|------------------------------------------------------------------------------------------|-------|
| 1  | Phylogeny of the genus <i>Cryphonectria</i>                                              | p. 1  |
| 3  | Genetic markers and PCR protocols                                                        | p. 2  |
| 4  | Specificity of newly designed primer for dsRNA                                           | p. 3  |
| 5  | Gel electrophoresis of dsRNA extracts                                                    | p. 4  |
| 6  | RNA-seq report                                                                           | p. 4  |
| 7  | Alignment of RNA-seq <i>de novo</i> contigs                                              | p. 4  |
| 8  | BLASTp report                                                                            | p. 5  |
| 9  | Maximum likelihood phylogeny of ORF1 amino acid sequences                                | p. 5  |
| 10 | Genotyping <i>Cryphonectria naterciae</i> DNA                                            | p. 6  |
| 11 | Phenotypic comparison of field-collected and experimentally infected <i>C. naterciae</i> | p. 6  |
| 12 | Growth rates of field-collected and experimentally infected strains                      | p. 7  |
| 13 | Fisher's exact test for inoculation experiments                                          | p. 8  |
|    | References                                                                               | p. 9  |
|    | Supplementary genome data                                                                | p. 10 |

\*\*\*\*\*

### 1. Phylogeny of the genus *Cryphonectria*

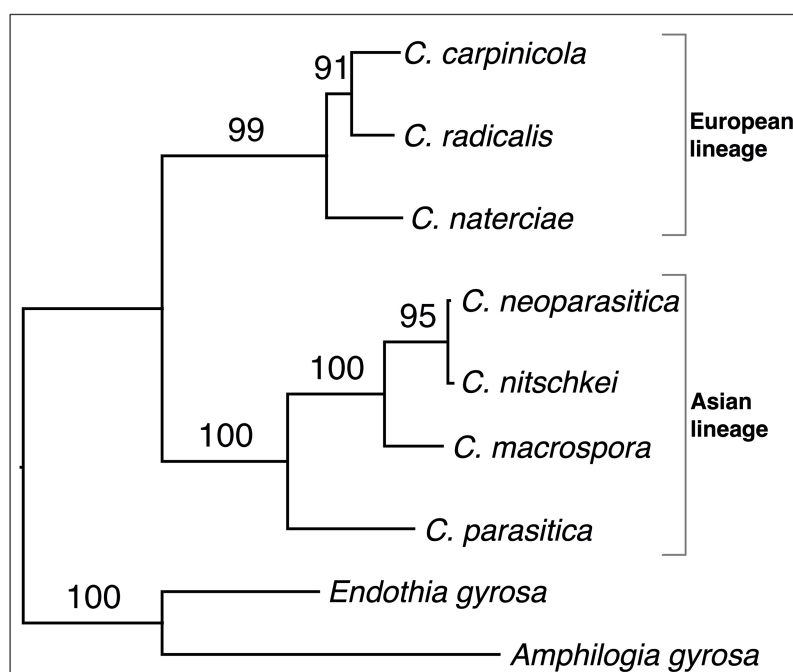

**Supplementary Figure S1.** Phylogeny of the genus *Cryphonectria*, modified according to Cornejo et al. (2020). *Endothia gyrosa* and *Amphilogia gyrosa* act as out-group species.

## 2. Genetic markers and PCR protocols

RT-PCR and RLM-RACE primer were designed using the software CLC Main Workbench v7 (CLC bio, Qiagen Digital Insights, Hilden, Germany) based on RNA-seq contigs of *Cryphonectria naterciae* M10535, M10544, and M10545. While the Cn-Vir-ORF1 amplicon is located from position 2,680 to 3,184 completely within the ORF1 region, the amplicon of Cn-Vir-ORF2 starts at the 3'-end of ORF1 expanding into the ORF2 region from 6,039 to 6,517 in relation to the complete genome GenBank accession MZ736512.

SSR primer were developed in Msatcommander 1.0.8-beta (Faircloth 2008) using unassembled reads of genomic sequencing data of *C. naterciae*, developed previously in our lab for a parallel study (Stauber et al. 2020, 2021). Settings in Msatcommander accepted trinucleotide repeats  $\geq 10$ . A total of 6,880 trinucleotide loci were found including 21 primer pairs, of which eleven were discarded from further study due to primer dimer formation, monorepeats, compound-interrupted repeats, or duplicates. Of the 10 remaining primer pairs, the loci Cn-Msat6 and Cn-Msat10 were selected, which contained the trinucleotide motifs (AGG)<sub>n</sub> and (ACC)<sub>n</sub>, respectively. PCR reaction was designed using a fluorochrome-labelled M13-tail according to Schuelke (2000). PCR products were run with LIZ500 as an internal size standard on a 3130xl Genetic Analyzer and alleles were sized with GeneMapper v3.7 (Thermo Fisher Scientific, Waltham, Massachusetts, U.S.A.).

**Supplementary Table S1.** List of all primer pairs designed for this study.

| Reaction              | Locus     | Primer label             | Primer sequence               | Amplicon size (nt) |
|-----------------------|-----------|--------------------------|-------------------------------|--------------------|
| RT-PCR <sup>a</sup>   | ORF1      | Cn-Vir_ORF1-F            | 5'-WTRGAGTGGGTRAGGGATG-3'     | 505                |
|                       |           | Cn-Vir_ORF1-R1           | 3'-GTATTCKGGAACGTTGGA-5'      |                    |
|                       | ORF2      | Cn-Vir_ORF2-F1           | 5'-CTGAGCGGGTTGATATGAAY-3'    | 479                |
|                       |           | Cn-Vir_ORF2-R2           | 3'-GRTCWGCCTCRAGATTATG-5'     |                    |
| RLM-RACE <sup>b</sup> | 5'-end    | Cn_Vir_5end-R1           | 3'-GGAAGAGAGGCATAAGTTGGATA-5' | Variable           |
|                       |           | Cn_Vir_5end-R2           | 3'-CCAGAGGGAAGAGAGGCATAA-5'   | Variable           |
|                       |           | Cn_Vir_5end-R3           | 3'-CCAGAGGGAAGAGAGGCATA-5'    | Variable           |
|                       | 3'-end    | Cn_Vir_3end-F1           | 5'-GGGTCTTATACATGGTGAGTTT-3'  | Variable           |
|                       |           | Cn_Vir_3end-F2           | 5'-AATCAAGCACAGAAGCTCAG-3'    | Variable           |
|                       |           | Cn_Vir_3end-F3           | 5'-AGGCGCCGAGGTTTAAACGTA-3'   | Variable           |
| SSR-PCR <sup>c</sup>  | Cn-Msat6  | Cn-Msat6-F <sup>d</sup>  | 5'-*GCAGAGACCTAATGTGCCAG-3'   | See Table S5       |
|                       |           | Cn-Msat6-R               | 5'-ATGTCCATTCTTGCTTGCC-3'     |                    |
|                       | Cn-Msat10 | Cn-Msat10-F <sup>d</sup> | 5'-*AGGTCTGGAGGTAGGCTAGAG-3'  | See Table S5       |
|                       |           | Cn-Msat10-R              | 5'-TCAAGCGACTACAGCTAACAC-3'   |                    |

<sup>a</sup> Protocol for RT-PCR using JumpStart REDTaq Ready Mix Reaction Mix (Merck KGaA, Darmstadt, Germany): 2 min 94°C initial denaturation; 30 cycles of 30 sec 94°C, 30 sec 55°C, 1 min 72°C; 10 min 72°C final extension.

<sup>b</sup> Protocol using QuickTaq HS DyeMix DTM-101 (Toyobo, Osaka, Japan): 2 min 94°C initial denaturation; 30 cycles of 15 sec 95°C, 30 sec 53°C, 1 min 68°C; 5 min 68°C final extension.

<sup>c</sup> Protocol using Type-it Multiplex PCR Master Mix (Qiagen, Hilden, Germany): 5 min 95°C initial denaturation; 30 cycles of 30 sec 95°C, 90 sec 60°C, 1 min 72°C; 45 min 72°C final extension.

<sup>d</sup> Asterisk: M13-tail TGTAACACGACGGCCAGT fluorochrome-labelled at the 5'-end.

#### 4. Specificity of newly designed primers for dsRNA detection

To exclude unspecific binding on fungal DNA, the primer specificity was first evaluated *in silico* using the Primer-BLAST option 'fungi (taxid:4751)' in the NCBI-suite (<https://www.ncbi.nlm.nih.gov>), refusing primer sequences that mismatched at <10 sites with any fungal DNA region.

*In vitro* tests used in TEST1: cDNA of dsRNA-positive and dsRNA-negative *C. naterciae* obtained from dsRNA-extraction using the Double-RNA Viral dsRNA Extraction Mini Kit (iNtRON Biotechnologies), treated with DNase and S1 nuclease (Thermo Fisher Scientific), and electrophoresed on a 1.5 % (w/v) agarose gel (Figure S2 A–F).

TEST2 used fungal DNA extracts of dsRNA-positive and dsRNA-negative *C. naterciae* obtained using the DNeasy Mini Kit (Qiagen). TEST2 was conceived as a duplex-PCR containing the Cn-Vir-ORF1 or Cn-Vir-ORF2 primer as well as the fungal primer for the *tef* gene (Carbone and Kohn 1999) to monitor the presence of fungal DNA (Figure S2 a–b, and d–e).

TEST3 used cDNA of the CHV1-positive *Cryphonectria parasitica* strain M3625 to check the specificity against another RNA virus, whose host may grow sympatrically with *C. naterciae* in the same trees (Figure S2 c, and f).

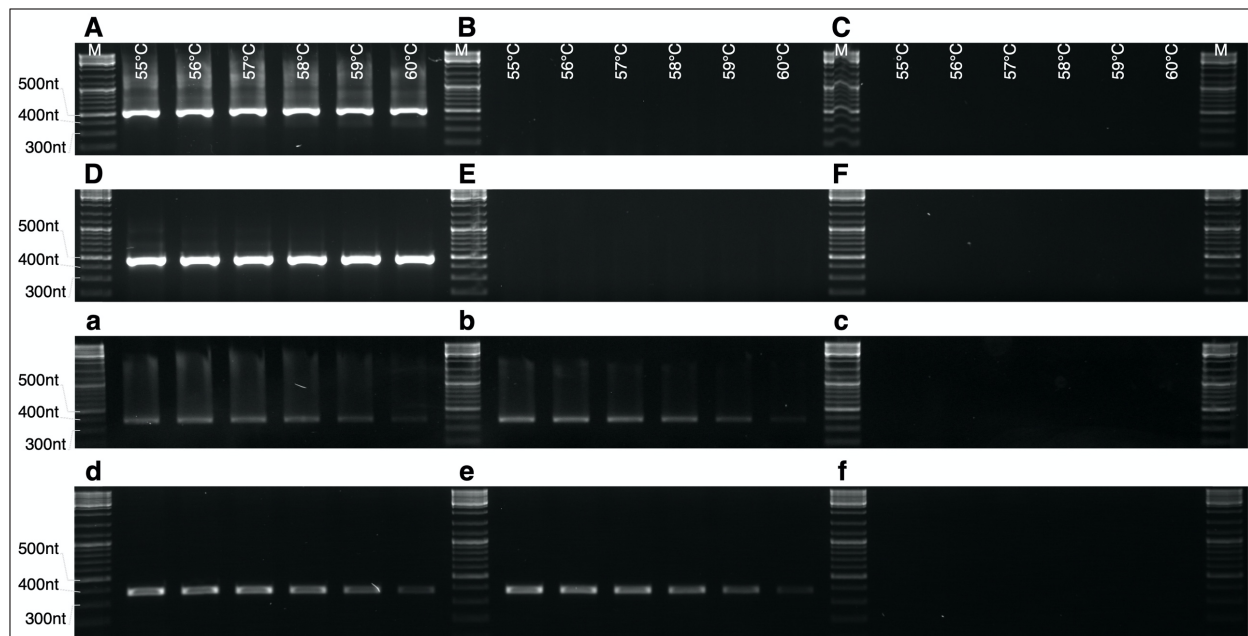

**Supplementary Figure S2.** PCR temperature gradients for testing the optimal annealing temperature as well as the specificity of newly designed primer pairs for dsRNA of *Cryphonectria naterciae*.

(A)–(F) TEST1 used cDNA of dsRNA-extraction. (A) dsRNA-positive strain M10535. Expected size of Cn-Vir-ORF1: 505 nt. (B) dsRNA-negative strain M10547. (D) dsRNA-positive strain M10535. Expected size of Cn-Vir-ORF2: 479 nt. (E) dsRNA-negative strain M10547. (C) & (F) Negative control of PCRs.

(a)–(b) and (d)–(e) TEST2 used fungal DNA of *Cryphonectria naterciae* and a duplex-PCR with Cn-Vir-ORF primer as well as *tef*-primer of amplicon size 375 nt. (a)–(c) Primer for Cn-Vir-ORF1 and *tef*. (a) DNA of the dsRNA-positive strain M10535. (b) DNA of the dsRNA-negative strain M10540. (d)–(f) Primer for Cn-Vir-ORF2 and *tef*. (d) DNA of the dsRNA-positive strain M10535. (e) DNA of the dsRNA-negative strain M10540.

(c) & (f) TEST3 used cDNA of the *Cryphonectria parasitica* CHV1-positive strain M3625.

M: Thermo Scientific GeneRuler 1 kb Plus DNA Ladder (SM1334).

## 5. Gel electrophoresis of dsRNA extracts

Of 31 *Cryphonectria naterciae* strains, screened by dsRNA extraction, 10 strains isolated from *Quercus suber* and 3 from *Castanea sativa* exhibited one segment at c. 10 kb by agarose gel electrophoresis.

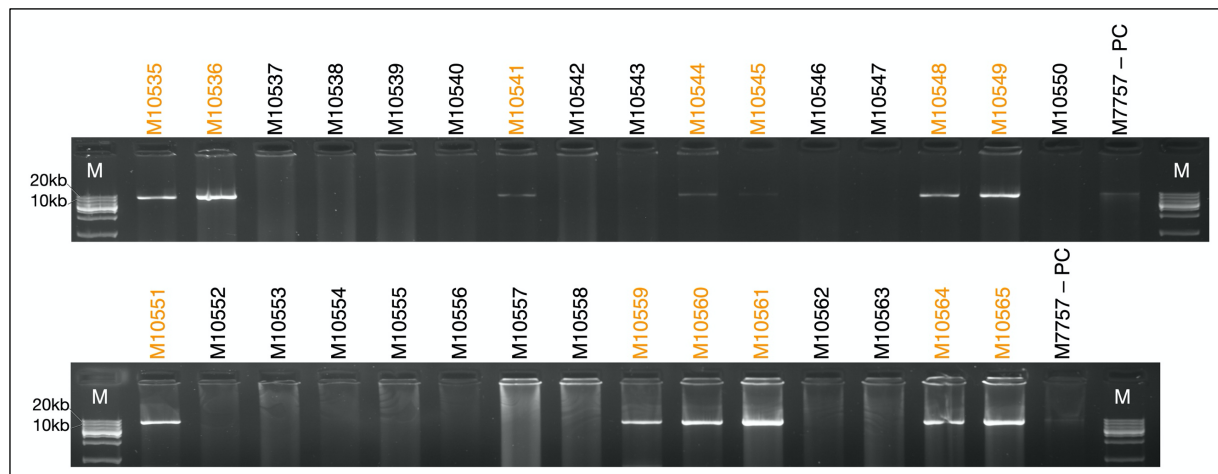

**Supplementary Figure S3.** Gel electrophoresis of dsRNA extracts of all 31 studied *Cryphonectria naterciae* isolates. Orange letters highlight strains found to be dsRNA-positive. M7757-PC: The positive control for the dsRNA-extraction used a *Cryphonectria parasitica* strain infected with CHV1 (12.7 kb RNA virus). M: Thermo Scientific GeneRuler 1 kb Plus DNA Ladder (SM1334).

## 6. RNA-seq report

A subset of three dsRNA extracts (M10535, M10544, and M10545) was subjected to RNA-seq. Sequencing cDNA library was constructed using the TruSeq RNA Sample Prep Kit (Illumina, San Diego, California, U.S.A.) and sequenced on an Illumina MiSeq v2. *De novo* assembly of reads was carried out using Trinity v2.6.5 (Grabherr et al. 2011). Demultiplexing and trimming the adaptor residuals of raw data resulted in 1,034,424 reads with a mean read length of 159 nt and a mean Q20% of 95%.

**Supplementary Table S2.** Results of the *de novo* assembly of RNA-seq raw data.

| <i>Cryphonectria naterciae</i> collection-ID | M10535  | M10544  | M10545  |
|----------------------------------------------|---------|---------|---------|
| Contig length (nt)                           | 6,522   | 5,346   | 8,066   |
| Coverage of contigs                          | 22,7427 | 27,6685 | 52,4069 |

## 7. Alignment of RNA-seq *de novo* contigs

The alignment was performed using CLC Main Workbench. ORF sequences found in the ORFfinder suite of NCBI were annotated directly on the alignment. The RNA-seq contig of M10545 contains deletions close to the 5'-end compared to the complete M10544-genome.

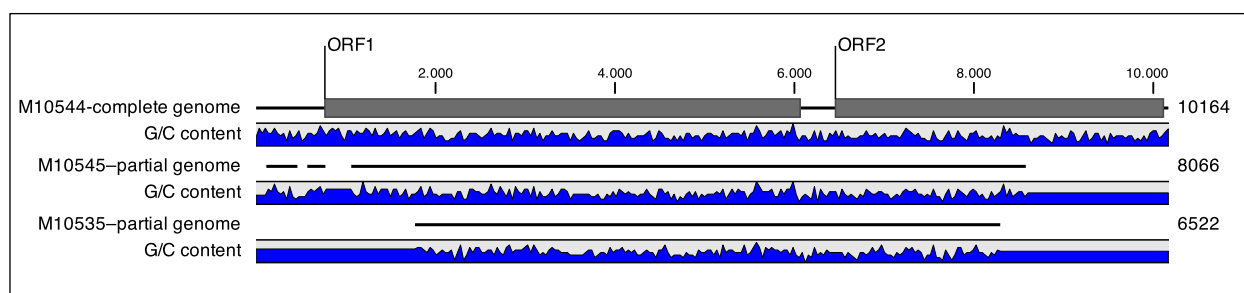

**Supplementary Figure S4.** Alignment of the complete M10544-genome and the partial genomes of M10535 and M10545 (black line). Grey boxes represent both ORFs. The blue graph outlines the G/C-content for each contig.



## 8. BLASTp report

Two open reading frames were detected on the genomic plus strand in all three contigs of M10535, M10544 and M10545. The amino acid sequences based on the complete genome of M10544, or partial sequences of M10535 and M10545 were used for BLASTp searches on UniProt (Altschul et al. 1997).

**Supplementary Table S3.** Results of BLASTp searches in the UniProt protein database. Last search on 22<sup>th</sup> of July 2021.

|              | M10535                        |                   | M10544           |        | M10545           |        |
|--------------|-------------------------------|-------------------|------------------|--------|------------------|--------|
|              | ORF1                          | ORF2              | ORF1             | ORF2   | ORF1             | ORF2   |
| Best match   | FvV1 <sup>a</sup>             | FvV2 <sup>b</sup> | FvV1             | FvV1   | FvV1             | FvV2   |
| Entry-ID     | H6UNN1                        | H6UNN0            | H6UNN1           | H6UNN2 | H6UNN1           | H6UNN0 |
| Protein      | Putative protein <sup>c</sup> | RdRp <sup>d</sup> | Putative protein | RdRp   | Putative protein | RdRp   |
| Identity     | 45.8%                         | 37.0%             | 47.7%            | 36.8%  | 46.4             | 45.6   |
| Query length | 1313                          | 458               | 1770             | 1223   | 1595             | 719    |
| E-value      | 0.0                           | 2.1e-78           | 0.0              | 0.0    | 0.0              | 0.0    |

<sup>a</sup> FvV1: *Fusarium virguliforme* dsRNA mycovirus 1 (Marvelli et al. 2014)

<sup>b</sup> FvV2: *Fusarium virguliforme* dsRNA mycovirus 2 (Marvelli et al. 2014)

<sup>c</sup> Putative protein: Putative structural/gag protein

<sup>d</sup> RdRp: RNA-directed RNA polymerase

## 9. Maximum likelihood phylogeny of ORF1 amino acid sequences

Amino acid matrices of the full genome contig of M10544 together with the most closely related viral species recognized by BLASTp (Supplementary Data) were analysed by maximum likelihood as implemented in the software PhyML v3.0 (Guindon & Gascuel 2003; Guindon et al. 2010) and run on the ATGC bioinformatics platform (<http://www.atgc-montpellier.fr>), which first calculates the best fitting substitution model prior to tree reconstruction. Support for each internal branch of the phylogeny was calculated using the nonparametric bootstrap option with 100 bootstrap replicates. The output tree contains the best tree found among two starting trees. Unrooted trees, including branch support, were graphically represented with FigTree v1.4.4 (Raubaut 2018).

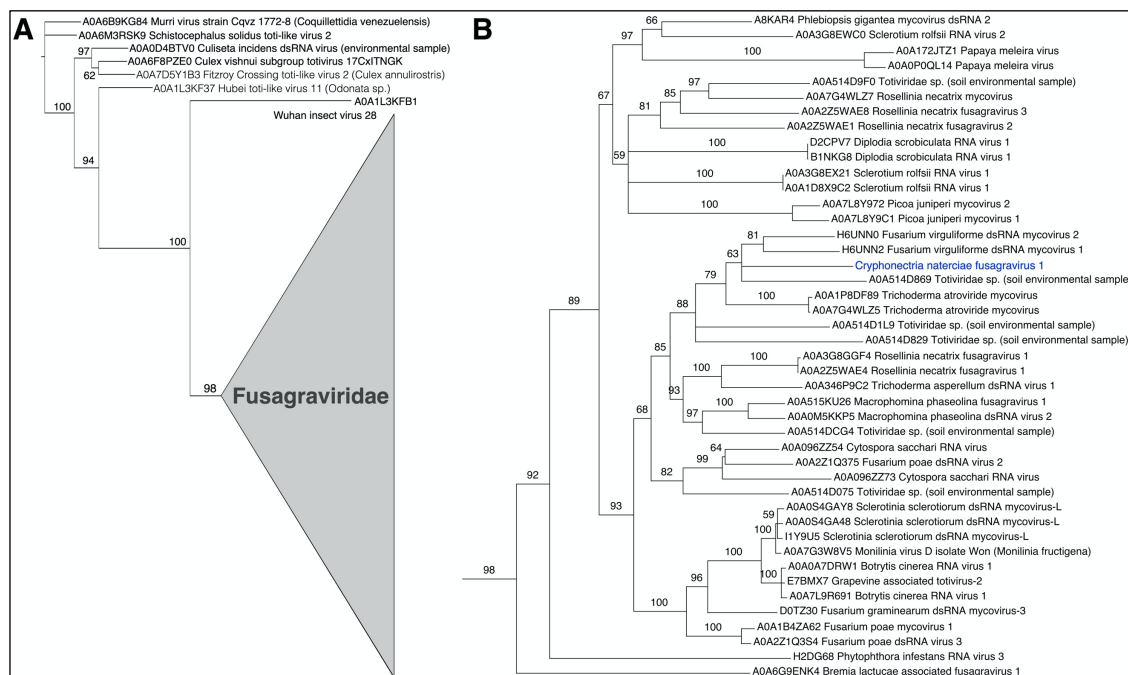

**Supplementary Figure S5.** (A) Most likely tree of amino acid ORF1-sequences, showing the phylogenetic relationship between the previously proposed family Fusagraviridae (collapsed) and close related insect viruses (1,945 polymorphic out of 2,006 amino acid sites; LG +G+I+F substitution model; 100 bootstrap replicates). (B) Details of collapsed most likely phylogeny in (A). Blue letters highlight the phylogenetic position of the novel virus candidate CnFGV1. Names and database accession numbers of related fusagraviruses included in the analysis are indicated in the tree. The numbers at nodes are values of > 50% of 1,000 bootstrap replicates.

## 10. Genotyping *Cryphonectria naterciae* DNA

To recognize genetically each isolate of *C. naterciae* individually prior and subsequent to pairing experiments, simple sequence repeats (SSR) markers were developed, which enable us to distinguish each strain individually combining two alleles.

**Supplementary Table S4.** Genotyping two SSR-loci of *Cryphonectria naterciae* strains, which were used for the horizontal virus transmission. Each unique allele size was additionally symbolized by coloured circles or rectangles.

|                   | Sample-ID | Collection-ID | Allele sizes Cn-Msat6 <sup>a</sup> | Allele sizes Cn-Msat10 <sup>a</sup> | Genotype |
|-------------------|-----------|---------------|------------------------------------|-------------------------------------|----------|
| Donor strains     | C0084     | M10535        | 174 ●                              | 160 ■                               | ●■       |
|                   | C0613     | M10544        | 168 ●                              | 172 ■                               | ●■       |
|                   | C0614     | M10545        | 171 ●                              | 150 ■                               | ●■       |
| Recipient strains | C0611     | M10542        | 171 ●                              | 172 ■                               | ●■       |
|                   | C0754     | M10562        | 171 ●                              | 172 ■                               | ●■       |
|                   | C0682     | M10547        | 171 ●                              | 172 ■                               | ●■       |
|                   | C0685     | M10550        | 162 ●                              | 163 ■                               | ●■       |

<sup>a</sup> Length (bp) in relation to the internal size standard.

## 11. Phenotype of the field-collected and the experimentally infected *Cryphonectria naterciae*

Isogenic virus-infected and virus-free isolates of *C. naterciae* were grown at 25 °C on PDA agar plates and their growth rates were measured regularly. A round agar plug (diam. 5 mm) was inoculated on the centre of each plate, and three replicate plates were made for each fungal isolate.

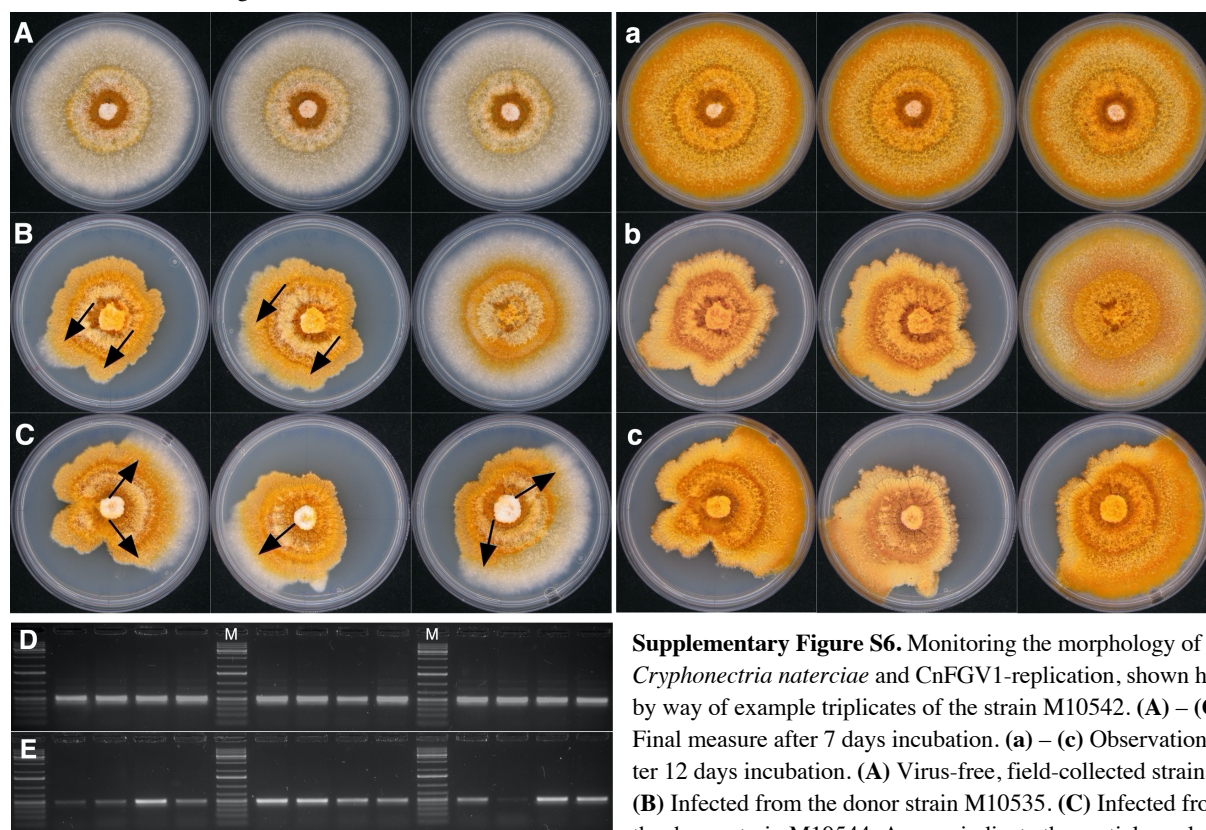

**Supplementary Figure S6.** Monitoring the morphology of *Cryphonectria naterciae* and CnFGV1-replication, shown here by way of example triplicates of the strain M10542. (A) – (C) Final measure after 7 days incubation. (a) – (c) Observations after 12 days incubation. (A) Virus-free, field-collected strains. (B) Infected from the donor strain M10535. (C) Infected from the donor strain M10544. Arrows indicate the partial regular growth of the mycelium. (D) – (E) Together with the last growth measure of (B) and (C), the presence of CnFGV1 was assessed by RT-PCR for each fungal replicate at the four coordinate points. M: Thermo Scientific GeneRuler 1 kb Plus DNA Ladder (SM1334).

Together with the last growth measure of (B) and (C), the presence of CnFGV1 was assessed by RT-PCR for each fungal replicate at the four coordinate points. M: Thermo Scientific GeneRuler 1 kb Plus DNA Ladder (SM1334).

## 12. Growth rates of field-collected and experimentally infected strains

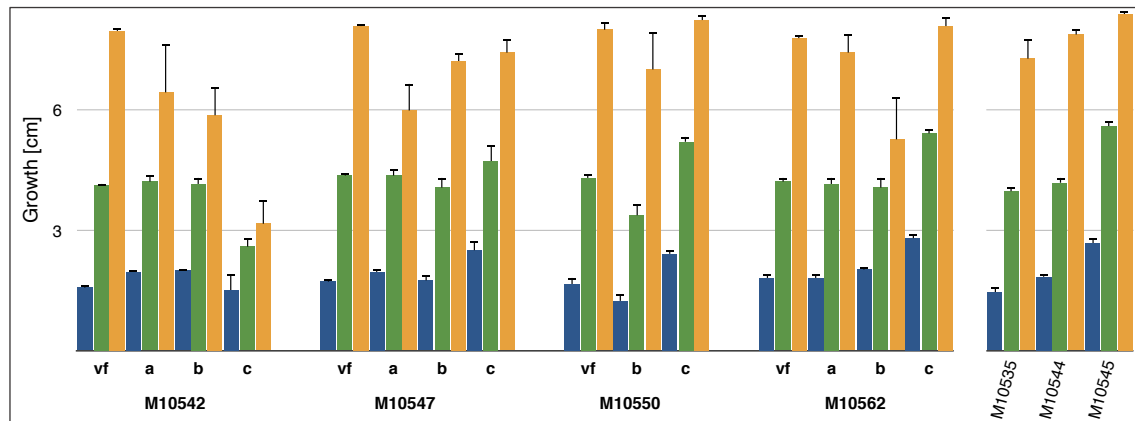

**Supplementary Figure S7.** Growth rate of CnFGV1-infected strains of *Cryphonectria naterciae*. Column height represents the growth after 2d, 4d, and 7d incubation of isogenic virus-free strains (= vf) or experimentally infected recipients M10452, M10547, M10550, and M10562. Donor strains are a = M10535, b = M10544, c = M10545. There was no CnFGV1 transmission from M10535 to M10550 (a missing). Vertical black lines indicate the standard deviation of 3 culture replicates. Columns at right show the growth rate of donor strains.

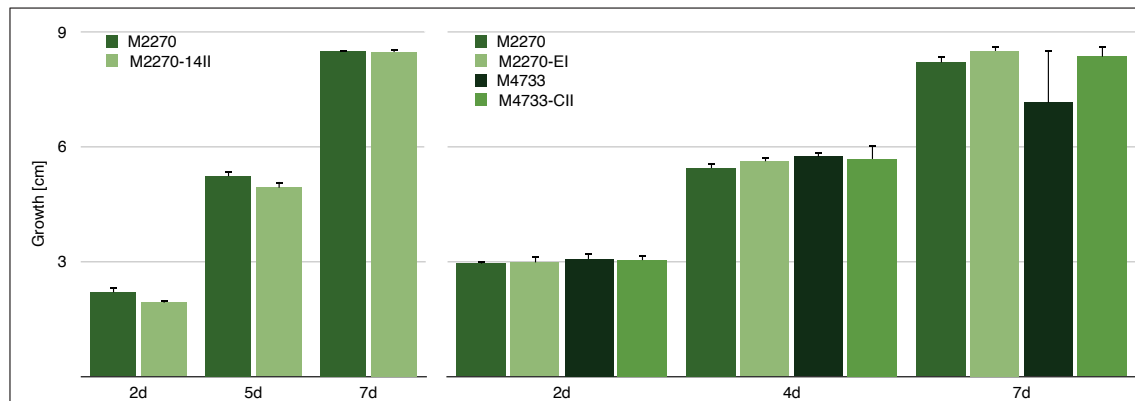

**Supplementary Figure S8.** Growth rate measure of cross-species infected strains. The columns represent the growth rate of isogenic virus-free and experimentally infected strains. **(Left)** The *C. radicalis* strain M2270-14II received CnFGV1 from donor strain M10544. **(Right)** Both *C. radicalis* strains M2270-EI and M4733-CII received CnFGV1 from donor strain M10545. Black lines indicate the standard deviation of triplicate cultures. All growth rate differences were non-significant according to a *t*-test.

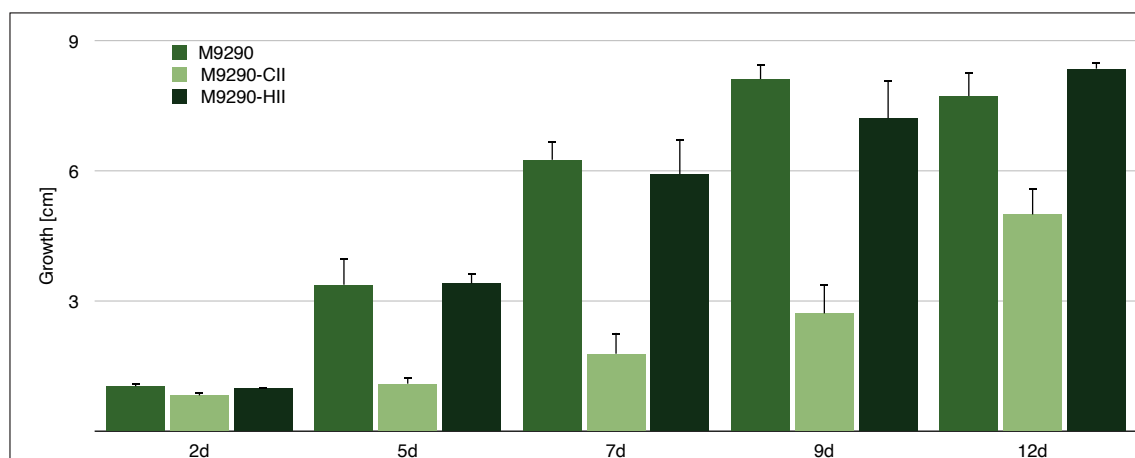

**Supplementary Figure S9.** Growth rate measure of isogenic virus-free and experimentally infected strains of *C. carpinicola*. Both infected replicates M9290-CII and M9290-HII received CnFGV1 from donor strain M10545. Black lines indicate the standard deviation of triplicate cultures. The growth rate of M9290-CII was statistically significant ( $P = 0.039$ ) slower; all other growth rate differences were non-significant according to a *t*-test.

**Supplementary Table S5.** Effect of the CnFGV1-infection on the fungus-plant interaction. (a) – (f) Listed are 2x2 contingency tables used to analyse differences in conidiation and formation of necrosis between CnFGV1-positive and CnFGV1-negative strains of *Cryphonectria naterciae*. The *p*-value of the two paired Fisher's exact test is given at each table end. All tests were not statistically significant. Fisher's tests were performed on the freely accessible platform [www.graphpad.com](http://www.graphpad.com) (GraphPad Software, San Diego, CA, U.S.A.).

**a) Differences in conidiation between CnFGV1-positive and CnFGV1-negative strains, applied to two tree species**

|                        | Pycnidia formed | No pycnidia formed | Total |
|------------------------|-----------------|--------------------|-------|
| <i>CnFGV1-positive</i> | 2               | 34                 | 36    |
| <i>CnFGV1-negative</i> | 7               | 29                 | 36    |
| Total                  | 9               | 63                 | 72    |

$p = 0.1514$

**b) Differences in formation of necrosis between CnFGV1-positive and CnFGV1-negative strains**

|                        | Necrosis formed | No necrosis formed | Total |
|------------------------|-----------------|--------------------|-------|
| <i>CnFGV1-positive</i> | 1               | 35                 | 36    |
| <i>CnFGV1-negative</i> | 4               | 32                 | 36    |
| Total                  | 5               | 67                 | 72    |

$p = 0.3570$

**c) Differences in conidiation between tree species, inoculated with CnFGV1-positive strains**

|                        | Pycnidia formed | No pycnidia formed | Total |
|------------------------|-----------------|--------------------|-------|
| <i>Quercus suber</i>   | 1               | 17                 | 18    |
| <i>Castanea sativa</i> | 1               | 17                 | 18    |
| Total                  | 2               | 34                 | 36    |

$p = 1.0$

**d) Differences in conidiation between tree species, inoculated with CnFGV1-negative strains**

|                        | Pycnidia formed | No pycnidia formed | Total |
|------------------------|-----------------|--------------------|-------|
| <i>Quercus suber</i>   | 3               | 15                 | 18    |
| <i>Castanea sativa</i> | 4               | 14                 | 18    |
| Total                  | 7               | 29                 | 36    |

$p = 1.0$

**e) Differences in formation of necrosis between tree species, inoculated with CnFGV1-positive strains**

|                        | Necrosis formed | No necrosis formed | Total |
|------------------------|-----------------|--------------------|-------|
| <i>Quercus suber</i>   | 0               | 18                 | 18    |
| <i>Castanea sativa</i> | 1               | 17                 | 18    |
| Total                  | 1               | 35                 | 36    |

$p = 1.0$

**f) Differences in formation of necrosis between tree species, inoculated with CnFGV1-negative strains**

|                        | Necrosis formed | No necrosis formed | Total |
|------------------------|-----------------|--------------------|-------|
| <i>Quercus suber</i>   | 2               | 16                 | 18    |
| <i>Castanea sativa</i> | 2               | 16                 | 18    |
| Total                  | 4               | 32                 | 36    |

$p = 1.0$

---

## References

- Cornejo, C., Hauser, A., Beenken, L., Cech, T. & Rigling, D. *Cryphonectria carpinicola* sp. nov. associated with hornbeam decline in Europe. *Fungal Biol.* **125**, 347-356, (2021).
- Faircloth, B. C. msatcommander: detection of microsatellite repeat arrays and automated, locus-specific primer design. *Mol. Ecol. Res.* **8**, 92-94, (2008).
- Stauber, L., Prospero, S., Croll, D. & Mitchell Aaron, P. Comparative genomics analyses of lifestyle transitions at the origin of an invasive fungal pathogen in the genus *Cryphonectria*. *mSphere* **5**, e00737-00720, 10.1128/mSphere.00737-20 (2020).
- Stauber, L., Badet, T., Feurtey, A., Prospero, S. & Croll, D. Emergence and diversification of a highly invasive chestnut pathogen lineage across southeastern Europe. *eLife* **10**, e56279, 10.7554/eLife.56279, (2021).
- Schuelke, M. An economic method for the fluorescent labeling of PCR fragments. *Nat. Biotechnol.* **18**, 233-234, (2000).
- Carbone, I. & Kohn, L. M. A method for designing primer sets for speciation studies in filamentous ascomycetes. *Mycologia* **91**, 553-556, (1999).
- Grabherr, M. G. *et al.* Full-length transcriptome assembly from RNA-Seq data without a reference genome. *Nat. biotechnol.* **29**, 644-652, (2011).
- Altschul, S. F. *et al.* Gapped BLAST and PSI-BLAST: a new generation of protein database search programs. *Nucleic Acids Res.* **25**, 3389-3402, (1997).
- Marvelli, R. A. *et al.* Identification of novel double-stranded RNA mycoviruses of *Fusarium virguliforme* and evidence of their effects on virulence. *Arch. Virol.* **159**, 349-352, (2014).
- Guindon, S. & Gascuel, O. A simple, fast, and accurate algorithm to estimate large phylogenies by maximum likelihood. *Syst. Biol.* **52**, 696-704, (2003).
- Guindon, S. *et al.* New algorithms and methods to estimate maximum-likelihood phylogenies: assessing the performance of PhyML 3.0. *Syst. Biol.* **59**, 307-321, (2010).
- Rambaut A. 2018. FigTree v1.4.4. <https://github.com/rambaut/figtree>.

Supplementary Genome Data

**A New Double-Stranded RNA Mycovirus in *Cryphonectria naterciae* Is Able to Cross the Species Barrier and Is Deleterious to a New Host**

C. Cornejo, S. Hisano, H. Braganca, N. Suzuki, D. Rigling

Journal of Fungi 2021

Supplementary Data: Complete genome of collection-ID M10544 – GenBank accession MZ736512

\*\*\*\*\*  
Content:

1. ORFfinder search 22 July 2021 (last search)
2. NCBI Conserved Domain search of ORF1 Jul 16 2021 (last search)
3. UniProt BLASTp 22 July 2021 (last search)

\*\*\*\*\*

\*\*\*\*\*  
1. ORFfinder BLASTp search of the complete genome M10544  
\*\*\*\*\*

| Label | Strand | Frame | Start | Stop | Length (nt aa)         |
|-------|--------|-------|-------|------|------------------------|
| ORF2  |        | +     |       | 2    | 758 6070 5313   1770   |
| ORF1  |        | +     |       | 1    | 6448 10119 3672   1223 |

>Sequence

758 6070 CDS

protein\_id lcl|ORF2  
product unnamed protein

6448 10119 CDS

protein\_id lcl|ORF1  
product unnamed protein

>lcl|ORF2

MVDRLTGHVFLDRKPKQSVRHRPMDSQQTLALNEAGSSASRSABAQQT  
IGRGCNLSYFPASIRTHNFALAHGVKLSKSIQWLSSTSGGRVPALP  
GVEHSCCAELECSANVCCGCTSTVERAERWSLPHPEGADGWVKSQAEEAP  
IRWNDPCPFRRSMVRADQSTGHPPVMDSYGYSALTEAGSSASRSABAQQN  
TIGRDGNLDSHNIAVSSTSGCPCGYKHGKDFECYALLANGVVPALTNYS  
SPAIAARTFQFKRAISFETDLTALVAAERSINLASQVKYEFNPACSCRINE  
VGSLVQGCQSVPHLYQIPSLNRWCDGTSAIAGGCYALWSGWARPAVM  
RLGRAPTAEAILHLLGNTHKCMRHDSWRFCVRGGTEFVHILPDRFGVS  
GKTLRLAMPASSRVGFSECVVNTTHSASFTRYQLSDSPFFSLIRSLLI  
SFVFSFVYGALDFGERILCKQIPKHFPTRSLRKNGYCYLELPHIWHPF  
VASLLGPKPPIRILRFLYVTLPLFLDFRVNFIVAKDMLDCDGRPVYHFA  
TTGGSEVGRRTARGVLWALDADARLGQFTSPEDQDTSSQLLAKSSAVNA  
IAPLGVRQVPTSLPIPIQISPGFTRRWAPNIFPTSLTSQPLEWVRDAQGH  
LALSRESEFTYHYPEDSSLSRLPTRFSATLLSKWFFRREVDEAGCVTTAY  
NRRFEPDTPSRTLDEFSAIGQVLDGNMSLDVLKADAGGSFSRALGSRN  
QRLVPGWEAGVIPRWLQFRDFAIKAAARRAYKEFCFRVASRYTLATVASD  
VCSNVPEYERHVIDTTTDDVQIIHINAEPPIAPPQNPQPPPIQWGEAALW  
TPAMLQAVLDGRAQFIDGESYTREELAEIIACLAPSTHDNVPHLRPVDP  
NDPDKETMLPSCARYSYPNGVTHIIVHHGNAPLPSIQDQNWIAQHAFSF  
PSAMTLSTIIRSYSVRHSLEDLFVWAFEAVAYRSVGYTFADALGTNEPTA  
TDDIIHAGSVPLDPLPRNCTGFAYFDCFFVPVSTTPELESYLSAPTEVFV  
SSISLAHFRAVSIAGWAKAGSLGRVFNLAANQGNQFLRNHRKWLRF  
YGELNVWSALHANTMGFYGFAPSPTRRTESNMLPNWWRDYCTPTLVNH  
YLELWAMQVIPVFQVLPYYSREAKNSHVEWAPGTPDQTASLVSFNHRKV  
RLAREVDVLEGHSWLGDAEYNSQFYAQQGNNGRFAYEGAQPKARFSFW  
QGSYARSPVTPQAATPISLSNGRLNDPFADFILPGSFQSYRMLDDKIIN  
WGVNEVSEHQLTNSEARRWWLASKGTAHVSLMVNVSPISQHYELDDLAD  
YSVTIWEKDGRAALTFSNLNELLTKDNFNPTNIEESQKPFQTRFDSAPH  
RFEQLRPTRVTNNRSSHAKARPALSSATDINRRIAEALRRPQAGNITYET  
KYPHADDLPKMNSYDVNVTKDGFEPQNMAMPNDLSFTPADRLKKIQEAQ  
AHLDDQFQEQYFAEQQQQAINRTRLQANRVASPATTRPIAPVPRRKARLP  
SVINYPAPEPASYHKGRQSYVANKPLPPQPKPLVPNDAPAAGAQQAAIDL  
ATLNARRGSLRPVHTVQGRRSLSPRANYLQRRADTSVPDEPARLHHVR

ERPQSQPIVSDPSDRGAALKSLEWSNPKPFLPPHDKQWLSQSIEDFPPL  
PEQRPPPLDSSDHLDTADTSRIRNQPGNSSSQVDLSQIDWNGGPDVAKAS  
ILDAFTTKASERVDMNNPKN

>lc1|ORF1  
MSSEPCQVNDTIYRLYHNLEADQYSCATRVLTILGLRDIPHERFKDVSKL  
GMHRPTLKFQLIRCFDPSFLLTEIDTSVDSLDTNIVNSIMLAHLEELPAR  
ATHDMEVVLFLFNDHISLALAESFIRRHSSQVIEGALDRPHNFRSVSQFP  
PVSGRAGAKVFLRPINLMSLGRPTILQCALMNVTIRIGPNRDWQAIPIA  
LLLLQYLQIGGNDLMFFFCVNPCHILDLDLAKLAKRLKELHAYIRVNLRLP  
RFAFLNLNSIGQREWARHLYGLETLVGRSELLELDITEEFKMRVADPALR  
GVPELVDRDSGNFSYIRFDTSEYTRLLPQIANQMVESLLKEKVVNDMHE  
FFQSRFLWAGSGGAPGAQVEWEDGTRLRLNKRGAALLGLKERQIRIDILDSV  
NNPQFSDPVQWSVNAKFESGKLSILNTVLEHYVIQGYISHVDANVNQ  
NTWYSVGQHNSARISNHLRLDDLSKNVGMWDYSDFNINHTFILMAQHT  
LAMVEGLIRRGKTSGITPERMRVISRDLHKAAYTVIARFNTYLHDHDSQ  
LTIKTARGLQSGERQTSRINSDCNYIDTLFVRLVSKRFFGYDVLNPVADH  
SGDDAFETTKNYSOGMFAAALYNLTGAAGQAHKILMSYPSRGGGLGEYLR  
LAYDAANKKVCYPIRAMMGLIHGEFFSNPIQPNERAAFLNQAQKLRR  
RGFNVPDKLLKSIINANCFVLTSDSGVKFTYRPNLTTLVLPVILGGVGV  
QEDDKSLVTAQLPISFKYGRDGLSCVAISPLLCDLRYESLSHTIDFVTL  
DDVIYKVANITGLTEQCIKTGNWDQYYALGRVYTRYITGLKSSSVNSSR  
VIIASNHLAMLKNNGFVLAITSNTRTGDRFKQHAQNYLERLGSVIRVTN  
XRLKLVSHLLEISSVAPHPIGVIYPYNTNPKPLPLYQAPRIQAKETIKSSK  
AQIPDIGVLYRNVTRIGPLYDDIAKSTLTGGWPKAAMNESLAEYGRALV  
EWEKQTAIEYRFELLRLPSITRVKRYIENCLPEYLGSLGASSHGLPIFL  
RTVQGYPCNQKVKHNYAANSALMRPLGLSVEKALNLLIEHAPGNTMLQKT  
ISVLKHPSLGSKAQNMILTKLTFLKYSNSTPEAQRALFQYFTGDWSLVP  
PAASQWSSDFTTLIRDLTLAGLEGDHFTPFMSQHALTLQPVTRALHIHYI  
EKIVFNATISTLHRYFPGIILQD

\*\*\*\*\*  
2. NCBI Conserved Domain search of ORF1 Jul 16 2021  
\*\*\*\*\*

CDD - this is a superset including NCBI-curated domains and data imported from Pfam, SMART, COG, PRK, and TIGRFAM.

Pfam - a mirror of a recent Pfam-A database of curated seed alignments. Pfam version numbers do change with incremental updates. As with SMART, families describing very short motifs or peptides may be missing from the mirror. An HMM-based search engine is offered on the Pfam site.

| Name   | Accession | Description                                                                                       |
|--------|-----------|---------------------------------------------------------------------------------------------------|
| RdRP_4 | pfam02123 | Viral RNA-directed RNA-polymerase; This family includes RNA-dependent RNA polymerase proteins ... |
|        | Interval  | E-value                                                                                           |
|        | 257-674   | 3.51e-24                                                                                          |

Viral RNA-directed RNA-polymerase; This family includes RNA-dependent RNA polymerase proteins (RdRPs) from Luteovirus, Totivirus and Rotavirus.

Pssm-ID: 280316 Cd Length: 465 Bit Score: 107.55 E-value: 3.51e-24

|               | 10                                                                      | 20  | 30  | 40  | 50  | 60  | 70  |
|---------------|-------------------------------------------------------------------------|-----|-----|-----|-----|-----|-----|
| 80            |                                                                         |     |     |     |     |     |     |
| lc1 ORF1      | ..... ..... ..... ..... ..... ..... ..... .....                         |     |     |     |     |     |     |
|               | 257 LNSIGQR--                                                           |     |     |     |     |     |     |
|               | EWARHLYGLETLVGRSELLELDITEEFKMRVADPalrgvpelvrdrsgnfsYIRFDTSEYTRLLPQIANQM | 334 |     |     |     |     |     |
| Cdd:pfam02123 | 99 LKSLGLNasSPGPKLVEGNPLLGRGVT-NVDWEEEAKNRVDLA-----                     |     |     |     |     |     |     |
|               | VVCRLVLLPMEELRAHIDAV                                                    | 160 |     |     |     |     |     |
|               |                                                                         | 90  | 100 | 110 | 120 | 130 | 140 |
| 160           |                                                                         |     |     |     |     |     |     |
| lc1 ORF1      | ..... ..... ..... ..... ..... ..... ..... .....                         |     |     |     |     |     |     |
|               | 335 VESLLKEKVVNDMHEFFQSRFLWAGSGGAPGAQVEWEDGTRLRLNKRGAALLGLK-            |     |     |     |     |     |     |
|               | ERQIRdildsvnNPQFSDPVQWSVN                                               | 414 |     |     |     |     |     |
| Cdd:pfam02123 | 161 LDELVVRRLGLCDPIRLFVKNEPLWCVNGH-PDHKLR--EGRLRLSSVSLVDQLVRRMLF-----   |     |     |     |     |     |     |
|               | EPQNNNEIAWWGS                                                           | 230 |     |     |     |     |     |
|               |                                                                         | 170 | 180 | 190 | 200 | 210 | 220 |
| 240           |                                                                         |     |     |     |     |     |     |

```

.....|.....|.....|.....|.....|.....|.....|.....|
lcl|ORF1      415 -----ALKFESGKLSILNTVLEHYVIQGYISHHV-
      DANVNQNTWYSVGQHNSARISNHLRLDDlSKNVGFMWDYSDFN 488
Cdd:pfam02123 231 vpskpSMKLEHGKSRAIYACDTRSYLAFEYLLAPVeKAWANKSVILNPGEGLDISGFDWSVQDWKR--
      GGVSLMLDYDDFN 308

      250      260      270      280      290      300      310
320

.....|.....|.....|.....|.....|.....|.....|.....|
lcl|ORF1      489 INHTFILMAqhtlAMVEGLIRRGktsgitpermrvISRDLHKAAYTVIARFN-
      TYLHDHDSQLTIKTARGLQSGERQTS 567
Cdd:pfam02123 309 SQHSTESMR-----AVFERLRRR-----LPDEPAEAAD-
      WLVCsMDsMYQLSDGTLAQRVPGTLKSGHRATT 370

      330      340      350      360      370      380      390
400

.....|.....|.....|.....|.....|.....|.....|.....|
lcl|ORF1      568 RINSDCNyIdtLFVRLVSKRFFGYdvlNpVADHSGDDAFETTKNYSDGMFAAALYNLTGAA-
      GQAHKilmsyPSRGGGLGE 647
Cdd:pfam02123 371 FINSVLNC---AYAELAGAPWADV----PTSIHMGDDVLEGLRTPADATSLLDKYARLGFKVNPSK-----
      QSVGHTIAE 438

      410      420
.....|.....|.....
lcl|ORF1      648 YLRLAYdaANRKVCGYPIRAMMGLIHG 674
Cdd:pfam02123 439 FLRVAF--CSHEVRGYLARAIAASLVSG 463

```

#### Blast search parameters

Data Source: Live blast search RID = F32HN992016  
 User Options: Database: CDSEARCH/cdd Low complexity filter: no Composition Based Adjustment:  
                   yes E-value threshold: 0.01 Maximum number of hits: 500

#### References:

- Marchler-Bauer A et al. (2017), "CDD/SPARCLE: functional classification of proteins via sub-family domain architectures.", *Nucleic Acids Res.*45(D)200-3.
- Marchler-Bauer A et al. (2015), "CDD: NCBI's conserved domain database.", *Nucleic Acids Res.*43(D)222-6.
- Marchler-Bauer A et al. (2011), "CDD: a Conserved Domain Database for the functional annotation of proteins.", *Nucleic Acids Res.*39(D)225-9.
- Marchler-Bauer A, Bryant SH (2004), "CD-Search: protein domain annotations on the fly.", *Nucleic Acids Res.*32(W)327-331.

\*\*\*\*\*  
 3. UniProt BLASTp alignment of the complete genome M10544  
 \*\*\*\*\*

BLASTP 2.9.0+

Reference: Stephen F. Altschul, Thomas L. Madden, Alejandro A. Schaffer, Jinghui Zhang, Zheng Zhang, Webb Miller, and David J. Lipman (1997), "Gapped BLAST and PSI-BLAST: a new generation of protein database search programs", *Nucleic Acids Res.* 25:3389-3402.

Reference for composition-based statistics: Alejandro A. Schaffer, L. Aravind, Thomas L. Madden, Sergei Shavirin, John L. Spouge, Yuri I. Wolf, Eugene V. Koonin, and Stephen F. Altschul (2001), "Improving the accuracy of PSI-BLAST protein database searches with composition-based statistics and other refinements", *Nucleic Acids Res.* 29:2994-3005.

Database: uniprotkb\_viruses  
 5,056,524 sequences; 1,856,704,045 total letters

Query= EMBOSS\_001



++++++  
Query ORF2: 25 best matches  
++++++

Length=1770

|                                                                       | Score<br>(Bits) | E<br>Value |
|-----------------------------------------------------------------------|-----------------|------------|
| Sequences producing significant alignments:                           |                 |            |
| TR:H6UNN1 H6UNN1_9VIRU Putative structural/gag protein OS=Fusarium... | 1003            | 0.0        |
| TR:H6UNM9 H6UNM9_9VIRU Putative structural/gag protein OS=Fusarium... | 950             | 0.0        |
| TR:A0A7G4WLZ4 A0A7G4WLZ4_9VIRU Structural/gag protein OS=Trichoder... | 835             | 0.0        |
| TR:A0A1P8DF80 A0A1P8DF80_9VIRU Putative structural/gag protein OS=... | 829             | 0.0        |
| TR:A0A514DCE7 A0A514DCE7_9VIRU Uncharacterized protein OS=Totiviri... | 531             | 1e-159     |
| TR:A0A514D1M0 A0A514D1M0_9VIRU Uncharacterized protein (Fragment) ... | 503             | 4e-154     |
| TR:A0A7S5WLX3 A0A7S5WLX3_9VIRU Uncharacterized protein OS=Macropho... | 468             | 2e-137     |
| TR:A0A515KU39 A0A515KU39_9VIRU Uncharacterized protein OS=Macropho... | 463             | 6e-135     |
| TR:A0A7S5WLX7 A0A7S5WLX7_9VIRU Uncharacterized protein OS=Macropho... | 434             | 1e-125     |
| TR:A0A7S5WLX4 A0A7S5WLX4_9VIRU Uncharacterized protein OS=Macropho... | 432             | 5e-125     |
| TR:A0A0M4L069 A0A0M4L069_9VIRU Uncharacterized protein OS=Macropho... | 430             | 2e-124     |
| TR:A0A7S5WLW1 A0A7S5WLW1_9VIRU Uncharacterized protein OS=Macropho... | 430             | 3e-124     |
| TR:A0A0A7DSJ8 A0A0A7DSJ8_9VIRU Uncharacterized protein OS=Botrytis... | 415             | 6e-119     |
| TR:E7BMX6 E7BMX6_9VIRU Uncharacterized protein OS=Grapevine associ... | 412             | 4e-118     |
| TR:A0A2Z1Q370 A0A2Z1Q370_9VIRU Uncharacterized protein OS=Fusarium... | 413             | 2e-117     |
| TR:A0A7L9R666 A0A7L9R666_9VIRU Uncharacterized protein OS=Botrytis... | 409             | 4e-117     |
| TR:A0A346P9C1 A0A346P9C1_9VIRU Uncharacterized protein OS=Trichode... | 409             | 6e-116     |
| TR:A0A2Z5WAE5 A0A2Z5WAE5_9VIRU Uncharacterized protein OS=Rosellin... | 393             | 7e-111     |
| TR:I1Y9U4 I1Y9U4_9VIRU Uncharacterized protein OS=Sclerotinia scle... | 387             | 2e-109     |
| TR:A0A2L1GG75 A0A2L1GG75_9VIRU Uncharacterized protein OS=Rosellin... | 388             | 4e-109     |
| TR:A0A1B4ZA68 A0A1B4ZA68_9VIRU Uncharacterized protein OS=Fusarium... | 370             | 1e-103     |
| TR:A0A2Z1Q3B3 A0A2Z1Q3B3_9VIRU Uncharacterized protein OS=Fusarium... | 364             | 1e-101     |
| TR:D0TZ29 D0TZ29_9VIRU Uncharacterized protein OS=Fusarium gramine... | 363             | 5e-101     |
| TR:A0A7G3W8V4 A0A7G3W8V4_9VIRU Uncharacterized protein OS=Monilini... | 254             | 4e-69      |
| TR:A0A2Z5WAD8 A0A2Z5WAD8_9VIRU Putative structural protein OS=Rose... | 166             | 5e-39      |
| TR:A0A3G8EWB1 A0A3G8EWB1_9VIRU Uncharacterized protein OS=Scleroti... | 164             | 6e-39      |

++++++  
Query ORF1: 25 best matches  
++++++

Length=1223

|                                                                       | Score<br>(Bits) | E<br>Value |
|-----------------------------------------------------------------------|-----------------|------------|
| Sequences producing significant alignments:                           |                 |            |
| TR:H6UNN2 H6UNN2_9VIRU RNA-directed RNA polymerase OS=Fusarium vir... | 740             | 0.0        |
| TR:H6UNN0 H6UNN0_9VIRU RNA-directed RNA polymerase OS=Fusarium vir... | 736             | 0.0        |
| TR:A0A7G4WLZ5 A0A7G4WLZ5_9VIRU RNA-directed RNA polymerase OS=Tric... | 717             | 0.0        |
| TR:A0A1P8DF89 A0A1P8DF89_9VIRU RNA-directed RNA polymerase OS=Tric... | 710             | 0.0        |
| TR:A0A514DCG4 A0A514DCG4_9VIRU RNA-directed RNA polymerase OS=Toti... | 555             | 7e-175     |
| TR:A0A346P9C2 A0A346P9C2_9VIRU RNA-directed RNA polymerase OS=Tric... | 549             | 1e-171     |
| TR:A0A0A7DRW1 A0A0A7DRW1_9VIRU RNA-directed RNA polymerase OS=Botr... | 540             | 3e-168     |
| TR:A0A7L9R691 A0A7L9R691_9VIRU RNA-directed RNA polymerase OS=Botr... | 531             | 7e-165     |
| TR:A0A0S4GAY8 A0A0S4GAY8_9VIRU RNA-directed RNA polymerase OS=Scle... | 528             | 9e-164     |
| TR:I1Y9U5 I1Y9U5_9VIRU RNA-directed RNA polymerase OS=Sclerotinia ... | 521             | 5e-161     |
| TR:A0A7G3W8V5 A0A7G3W8V5_9VIRU RNA-directed RNA polymerase OS=Moni... | 520             | 1e-160     |
| TR:A0A0S4GA48 A0A0S4GA48_9VIRU RNA-directed RNA polymerase OS=Scle... | 520             | 2e-160     |
| TR:A0A7S5WLX9 A0A7S5WLX9_9VIRU RNA-dependent RNA polymerase OS=Mac... | 512             | 2e-158     |
| TR:A0A7S5WLW9 A0A7S5WLW9_9VIRU RNA-dependent RNA polymerase OS=Mac... | 507             | 6e-157     |
| TR:A0A2Z5WAE4 A0A2Z5WAE4_9VIRU RNA-directed RNA polymerase OS=Rose... | 505             | 2e-155     |
| TR:A0A7S5WLX4 A0A7S5WLX4_9VIRU RNA-dependent RNA polymerase OS=Mac... | 500             | 3e-153     |
| TR:A0A3G8GGF4 A0A3G8GGF4_9VIRU RNA-directed RNA polymerase OS=Rose... | 499             | 3e-153     |
| TR:A0A7S5WLW5 A0A7S5WLW5_9VIRU RNA-dependent RNA polymerase OS=Mac... | 490             | 5e-152     |
| TR:A0A515KU26 A0A515KU26_9VIRU RNA-directed RNA polymerase OS=Macr... | 491             | 3e-150     |
| TR:A0A0M5KKP5 A0A0M5KKP5_9VIRU RNA-directed RNA polymerase OS=Macr... | 485             | 4e-150     |
| TR:A0A514D1L9 A0A514D1L9_9VIRU RNA-directed RNA polymerase (Fragme... | 479             | 3e-149     |
| TR:A0A2Z1Q3S4 A0A2Z1Q3S4_9VIRU RNA-directed RNA polymerase OS=Fusa... | 480             | 1e-145     |
| TR:A0A2Z1Q375 A0A2Z1Q375_9VIRU RNA-directed RNA polymerase OS=Fusa... | 472             | 1e-142     |
| TR:D0TZ30 D0TZ30_9VIRU RNA-directed RNA polymerase OS=Fusarium gra... | 469             | 9e-142     |
| TR:A0A1B4ZA62 A0A1B4ZA62_9VIRU RNA-directed RNA polymerase OS=Fusa... | 452             | 3e-135     |
| TR:A0A3G8EX21 A0A3G8EX21_9VIRU RNA-directed RNA polymerase OS=Scle... | 381             | 4e-110     |

+++++  
Query ORF2: query sequence and 24 best matches aligned  
+++++

CLUSTAL O(1.2.4) multiple sequence alignment

```

lc1|ORF2                                MVDRLTGHVFLDRKPKQSVRHPRMDSQQTALNEAGSSASRSAVAQQTIGRCNLDSY 60
TR|H6UNN1|H6UNN1_9VIRU                  -----
TR|H6UNM9|H6UNM9_9VIRU                  -----
TR|A0A7G4WLZ4|A0A7G4WLZ4_9VIRU          -----
TR|A0A1P8DF80|A0A1P8DF80_9VIRU          -----
TR|A0A514DCE7|A0A514DCE7_9VIRU          -----
TR|A0A514D1M0|A0A514D1M0_9VIRU          -----
TR|A0A7S5WLV3|A0A7S5WLV3_9VIRU          -----
TR|A0A515KU39|A0A515KU39_9VIRU          -----
TR|A0A7S5WLX7|A0A7S5WLX7_9VIRU          -----
TR|A0A7S5WLV4|A0A7S5WLV4_9VIRU          -----
TR|A0A0M4L069|A0A0M4L069_9VIRU          -----
TR|A0A7S5WLW1|A0A7S5WLW1_9VIRU          -----
TR|A0A0A7DSJ8|A0A0A7DSJ8_9VIRU          -----
TR|A0A2Z1Q370|A0A2Z1Q370_9VIRU          -----
TR|E7BMX6|E7BMX6_9VIRU                  -----
TR|A0A7L9R666|A0A7L9R666_9VIRU          -----
TR|A0A346P9C1|A0A346P9C1_9VIRU          -----MAFSGNTERQTRLESSASQP----- 20
TR|A0A2Z5WAE5|A0A2Z5WAE5_9VIRU          -----
TR|A0A2L1GG75|A0A2L1GG75_9VIRU          -----MTMH-----AD----- 6
TR|I1Y9U4|I1Y9U4_9VIRU                  -----
TR|A0A1B4ZA68|A0A1B4ZA68_9VIRU          -----
TR|A0A2Z1Q3B3|A0A2Z1Q3B3_9VIRU          -----
TR|D0TZ29|D0TZ29_9VIRU                  -----
TR|A0A7G3W8V4|A0A7G3W8V4_9VIRU          -----
TR|A0A2Z5WAD8|A0A2Z5WAD8_9VIRU          -----

```

```

lc1|ORF2                                FPASIRTHNFALAHGVKLSKSIAQWSLTSSSTSGGRVPALPGVEHSCCAELECSANVCCGC 120
TR|H6UNN1|H6UNN1_9VIRU                  -----
TR|H6UNM9|H6UNM9_9VIRU                  -----
TR|A0A7G4WLZ4|A0A7G4WLZ4_9VIRU          -----
TR|A0A1P8DF80|A0A1P8DF80_9VIRU          -----
TR|A0A514DCE7|A0A514DCE7_9VIRU          -----
TR|A0A514D1M0|A0A514D1M0_9VIRU          -----
TR|A0A7S5WLV3|A0A7S5WLV3_9VIRU          -----
TR|A0A515KU39|A0A515KU39_9VIRU          -----
TR|A0A7S5WLX7|A0A7S5WLX7_9VIRU          -----
TR|A0A7S5WLV4|A0A7S5WLV4_9VIRU          -----
TR|A0A0M4L069|A0A0M4L069_9VIRU          -----
TR|A0A7S5WLW1|A0A7S5WLW1_9VIRU          -----
TR|A0A0A7DSJ8|A0A0A7DSJ8_9VIRU          -----
TR|A0A2Z1Q370|A0A2Z1Q370_9VIRU          -----
TR|E7BMX6|E7BMX6_9VIRU                  -----
TR|A0A7L9R666|A0A7L9R666_9VIRU          -----
TR|A0A346P9C1|A0A346P9C1_9VIRU          -----
TR|A0A2Z5WAE5|A0A2Z5WAE5_9VIRU          -----
TR|A0A2L1GG75|A0A2L1GG75_9VIRU          -----
TR|I1Y9U4|I1Y9U4_9VIRU                  -----
TR|A0A1B4ZA68|A0A1B4ZA68_9VIRU          -----
TR|A0A2Z1Q3B3|A0A2Z1Q3B3_9VIRU          -----
TR|D0TZ29|D0TZ29_9VIRU                  -----
TR|A0A7G3W8V4|A0A7G3W8V4_9VIRU          -----
TR|A0A2Z5WAD8|A0A2Z5WAD8_9VIRU          -----

```

```

lc1|ORF2                                TSTVERAERWSLPHPEGADGWVKSQAEEAPIRWNDCPPFRSMVMRADQSTGHPPVMDSYG 180
TR|H6UNN1|H6UNN1_9VIRU                  -----
TR|H6UNM9|H6UNM9_9VIRU                  -----
TR|A0A7G4WLZ4|A0A7G4WLZ4_9VIRU          -----MASFN 5
TR|A0A1P8DF80|A0A1P8DF80_9VIRU          -----MASFN 5
TR|A0A514DCE7|A0A514DCE7_9VIRU          -----
TR|A0A514D1M0|A0A514D1M0_9VIRU          -----
TR|A0A7S5WLV3|A0A7S5WLV3_9VIRU          -----
TR|A0A515KU39|A0A515KU39_9VIRU          -----MVC DGWSSPFME-----QTNVLLGSAREWRDNT 27

```

|    |            |                  |       |                     |
|----|------------|------------------|-------|---------------------|
| TR | A0A7S5WLX7 | A0A7S5WLX7_9VIRU | ----- |                     |
| TR | A0A7S5WLV4 | A0A7S5WLV4_9VIRU | ----- |                     |
| TR | A0A0M4L069 | A0A0M4L069_9VIRU | ----- |                     |
| TR | A0A7S5WLW1 | A0A7S5WLW1_9VIRU | ----- |                     |
| TR | A0A0A7DSJ8 | A0A0A7DSJ8_9VIRU | ----- | MMSS 4              |
| TR | A0A2Z1Q370 | A0A2Z1Q370_9VIRU | ----- | MDYPR 5             |
| TR | E7BMX6     | E7BMX6_9VIRU     | ----- | MMSS 4              |
| TR | A0A7L9R666 | A0A7L9R666_9VIRU | ----- | MMSS 4              |
| TR | A0A346P9C1 | A0A346P9C1_9VIRU | ----- | VVAQQATIRRGSNLDS 38 |
| TR | A0A2Z5WAE5 | A0A2Z5WAE5_9VIRU | ----- | MDSYE 5             |
| TR | A0A2L1GG75 | A0A2L1GG75_9VIRU | ----- | QSIGHYPMDSYE 19     |
| TR | I1Y9U4     | I1Y9U4_9VIRU     | ----- | MSS 3               |
| TR | A0A1B4ZA68 | A0A1B4ZA68_9VIRU | ----- | MLNT 4              |
| TR | A0A2Z1Q3B3 | A0A2Z1Q3B3_9VIRU | ----- | MLNT 4              |
| TR | D0TZ29     | D0TZ29_9VIRU     | ----- | MAYSK 5             |
| TR | A0A7G3W8V4 | A0A7G3W8V4_9VIRU | ----- |                     |
| TR | A0A2Z5WAD8 | A0A2Z5WAD8_9VIRU | ----- |                     |

  

|     |            |                    |                                                          |                                         |     |
|-----|------------|--------------------|----------------------------------------------------------|-----------------------------------------|-----|
| lc1 | ORF2       | YSALT--EAGSSAS---- | RS-----                                                  | AVAQQNTIG-RDGNLDSHNIASVSTSG             | 220 |
| TR  | H6UNN1     | H6UNN1_9VIRU       | -----                                                    | MS-----S-SLSNLVSNF-----                 | 12  |
| TR  | H6UNM9     | H6UNM9_9VIRU       | -----                                                    | MS-----SSN-----                         | 5   |
| TR  | A0A7G4WLZ4 | A0A7G4WLZ4_9VIRU   | NTTTT-----                                               | ITNTTSAT-----                           | 18  |
| TR  | A0A1P8DF80 | A0A1P8DF80_9VIRU   | NTTTT-----                                               | TTSTPTT-----                            | 18  |
| TR  | A0A514DCE7 | A0A514DCE7_9VIRU   | -----                                                    |                                         |     |
| TR  | A0A514D1M0 | A0A514D1M0_9VIRU   | -----                                                    |                                         |     |
| TR  | A0A7S5WLV3 | A0A7S5WLV3_9VIRU   | -----                                                    |                                         |     |
| TR  | A0A515KU39 | A0A515KU39_9VIRU   | YRGVSR-VTDD---                                           | L-----K-----CKLGGGPLGMKLAHRKSPPSGMACPAG | 66  |
| TR  | A0A7S5WLX7 | A0A7S5WLX7_9VIRU   | -----                                                    |                                         |     |
| TR  | A0A7S5WLV4 | A0A7S5WLV4_9VIRU   | -----                                                    |                                         |     |
| TR  | A0A0M4L069 | A0A0M4L069_9VIRU   | -----                                                    |                                         |     |
| TR  | A0A7S5WLW1 | A0A7S5WLW1_9VIRU   | -----                                                    |                                         |     |
| TR  | A0A0A7DSJ8 | A0A0A7DSJ8_9VIRU   | YGIKT--VNQTATVAVD----                                    | A-----SAENGAQIN-RGGNLDSFSAGVNYSG        | 46  |
| TR  | A0A2Z1Q370 | A0A2Z1Q370_9VIRU   | NTGRQS-SEEFSSARS-----                                    | VMAQLNTIG-KDGNLDSQTINDSATGN             | 46  |
| TR  | E7BMX6     | E7BMX6_9VIRU       | YGIKT--VNQTATVAVD----                                    | A-----SAENGAQIN-RGNLDSSTAGVNYSG         | 46  |
| TR  | A0A7L9R666 | A0A7L9R666_9VIRU   | YGIKT--VNQTATVAVD----                                    | A-----SAENGAQIN-RGNLDSSTAGVNYSG         | 46  |
| TR  | A0A346P9C1 | A0A346P9C1_9VIRU   | VSAGPESTAAFTXGALRQLGITDMTGKLTIVILEKLG-DGSRLAASDSGERAL--- | AS                                      | 94  |
| TR  | A0A2Z5WAE5 | A0A2Z5WAE5_9VIRU   | Y-TTP-SSQSFAST--T-----                                   | TGLT-NGSNKRDGNLDSQNTQFDGTST             | 45  |
| TR  | A0A2L1GG75 | A0A2L1GG75_9VIRU   | C-TTP-SSQSFAST--T-----                                   | TGLT-NGSNKRDGNLDSQNTQFDGTST             | 59  |
| TR  | I1Y9U4     | I1Y9U4_9VIRU       | YGITK--VNKTATVAVD----                                    | A-----SALNGAQIN-RGNLDSYTTTSFA----       | 41  |
| TR  | A0A1B4ZA68 | A0A1B4ZA68_9VIRU   | YASARA-VNSTAYASTCASGAA-----                              | SNVTGGSMNEAVGHVDSHLSVNS----             | 49  |
| TR  | A0A2Z1Q3B3 | A0A2Z1Q3B3_9VIRU   | YASVRA-VNSTAYASTCASGAA-----                              | SNVTGGTANEAVGHVDSHSHSYAE----            | 49  |
| TR  | D0TZ29     | D0TZ29_9VIRU       | YQGRHA-SEEFSSAPR-----                                    | T-----APVQQSSIG-KDGNLDNQASHLND----      | 43  |
| TR  | A0A7G3W8V4 | A0A7G3W8V4_9VIRU   | -----                                                    |                                         |     |
| TR  | A0A2Z5WAD8 | A0A2Z5WAD8_9VIRU   | -----                                                    |                                         |     |

  

|     |            |                                                         |                              |                                                 |     |
|-----|------------|---------------------------------------------------------|------------------------------|-------------------------------------------------|-----|
| lc1 | ORF2       | CPCGYKHGKDFECYALLANGVVPALTNYSPPSPAIARTRQFKRAISFETD----- | LTA                          | 272                                             |     |
| TR  | H6UNN1     | H6UNN1_9VIRU                                            | -----                        | LFEA-SSITTGTLTA-----PSSFQELGVSRA-----E-----GAR  | 41  |
| TR  | H6UNM9     | H6UNM9_9VIRU                                            | -----                        | IFDNTTSISESVYIS-----QRRALVTQGLTKA-----Q-----VKQ | 38  |
| TR  | A0A7G4WLZ4 | A0A7G4WLZ4_9VIRU                                        | SNSTQDEANIYKN--SIQAAVQA----- | AVFVSKE--TAGEFDTL--DECVFRVRG                    | 63  |
| TR  | A0A1P8DF80 | A0A1P8DF80_9VIRU                                        | SNTKQDEANIYKN--SIQAAVQA----- | AVFVSKE--TAGEFDTL--NECVFRVRG                    | 63  |
| TR  | A0A514DCE7 | A0A514DCE7_9VIRU                                        | MSFF-----                    | TTMKN-----LFYRKE-SRSAPTSLS-----                 | 25  |
| TR  | A0A514D1M0 | A0A514D1M0_9VIRU                                        | -----                        |                                                 |     |
| TR  | A0A7S5WLV3 | A0A7S5WLV3_9VIRU                                        | -----                        | M-----A-----SY--FTS-----                        | 7   |
| TR  | A0A515KU39 | A0A515KU39_9VIRU                                        | TMDYLMNTQQVS-----            | ASACNTLEA-----R-----GY--MTG-----                | 93  |
| TR  | A0A7S5WLX7 | A0A7S5WLX7_9VIRU                                        | -----                        | MFCNLQNA-----MAYEAG-LNCF-----TSV-----           | 21  |
| TR  | A0A7S5WLV4 | A0A7S5WLV4_9VIRU                                        | -----                        | MASF-----LPS-----                               | 7   |
| TR  | A0A0M4L069 | A0A0M4L069_9VIRU                                        | -----                        | MASF-----ILA-----                               | 7   |
| TR  | A0A7S5WLW1 | A0A7S5WLW1_9VIRU                                        | -----                        | MFCNLQNA-----MAYEAG-LNCF-----TSV-----           | 21  |
| TR  | A0A0A7DSJ8 | A0A0A7DSJ8_9VIRU                                        | I-----                       | SS-----S-----ASKADL-----                        | 56  |
| TR  | A0A2Z1Q370 | A0A2Z1Q370_9VIRU                                        | DKCRPVVTPLTS-----            | ARILNRADNAHD-RLSKNRAS-KRGFPFTATTVNQNGFNGV-      | 97  |
| TR  | E7BMX6     | E7BMX6_9VIRU                                            | N-----                       | LS-----S-----VSKADL-----                        | 56  |
| TR  | A0A7L9R666 | A0A7L9R666_9VIRU                                        | T-----                       | FS-----S-----ASKADL-----                        | 56  |
| TR  | A0A346P9C1 | A0A346P9C1_9VIRU                                        | ---QVR-----                  | N-----GQCFINAVV                                 | 107 |
| TR  | A0A2Z5WAE5 | A0A2Z5WAE5_9VIRU                                        | ---HQN-----                  | N-----NVCSDEVKM-                                | 57  |
| TR  | A0A2L1GG75 | A0A2L1GG75_9VIRU                                        | ---HQN-----                  | N-----NVCSDFKK-                                 | 71  |
| TR  | I1Y9U4     | I1Y9U4_9VIRU                                            | -----                        | SKADLSA-----                                    | 48  |
| TR  | A0A1B4ZA68 | A0A1B4ZA68_9VIRU                                        | -----                        |                                                 |     |
| TR  | A0A2Z1Q3B3 | A0A2Z1Q3B3_9VIRU                                        | -----                        |                                                 |     |
| TR  | D0TZ29     | D0TZ29_9VIRU                                            | -----                        | S-----                                          | 44  |
| TR  | A0A7G3W8V4 | A0A7G3W8V4_9VIRU                                        | -----                        |                                                 |     |

TR|A0A2Z5WAD8|A0A2Z5WAD8\_9VIRU-----MSFNTN-----Y 7

lc1|ORF2 LVAAERSINLASQV-----KYEFNPACSCRINEVGSLSVQGCQSVPHLYQIPSLN-RWC 325  
TR|H6UNN1|H6UNN1\_9VIRU LKNKPLVFSASPGVYPP-----TCGCNIDNQGHVVTFCVHEHPVGLPLPLCHAS 92  
TR|H6UNM9|H6UNM9\_9VIRU LYKSE---RLATPVFPYIDVPSQPDITLCSFL-CPCLEGQTCGAHPGGPLPAIPCDWN 94  
TR|A0A7G4WLZ4|A0A7G4WLZ4\_9VIRU AGQRHVDITYCQPFP-----NSHKCKCLF--NSKLKGNCQSPPEGFPFI-----LN 108  
TR|A0A1P8DF80|A0A1P8DF80\_9VIRU AGQRHVDITYCQPFP-----STHKCKCLF--NSKLGRGNCQSPPEGFPV-----LN 108  
TR|A0A514DCE7|A0A514DCE7\_9VIRU TVSPARTFT--S-----AGSAEVTST-QTTSSGG-----WY 53  
TR|A0A514D1M0|A0A514D1M0\_9VIRU -----  
TR|A0A7S5WL3|A0A7S5WL3\_9VIRU A--LAQSFK-----KS-----QRSLSD-----LA 24  
TR|A0A515KU39|A0A515KU39\_9VIRU P--ATTVIA-----YIAGVTS-DLGADLAH-----VL 117  
TR|A0A7S5WLX7|A0A7S5WLX7\_9VIRU A--LAQSLK-----KSYSH-----LI 35  
TR|A0A7S5WL4|A0A7S5WL4\_9VIRU A--LAQSFK-----KSQTA-----LA 21  
TR|A0A0M4L069|A0A0M4L069\_9VIRU A--LAQSFK-----KSQPT-----LA 21  
TR|A0A7S5WLW1|A0A7S5WLW1\_9VIRU A--LAQSLK-----KSHPH-----FI 35  
TR|A0A0A7DSJ8|A0A0A7DSJ8\_9VIRU LVHARHSKN--E-----RFSFVFLSSALQRVYTA-----ML 85  
TR|A0A2Z1Q370|A0A2Z1Q370\_9VIRU TAPLLARYRASD-----P-----HNSAPVM---EGQVLGG-----RD 126  
TR|E7BMX6|E7BMX6\_9VIRU LVHAQHASKN--E-----QFSFVFL-SRWQRFCTA-----II 84  
TR|A0A7L9R666|A0A7L9R666\_9VIRU LVHAQHSKI--E-----RFSFVFFSSGWCFCFTA-----IL 85  
TR|A0A346P9C1|A0A346P9C1\_9VIRU PEDRYKLSHISD--WP-----TRTAFINALIETGARLEMARCLSLQLGGK-----WA 152  
TR|A0A2Z5WAE5|A0A2Z5WAE5\_9VIRU -STAAGSVNLS--FK-----GTI--TQRTMERGRIFAHHFAVI-----WL 93  
TR|A0A2L1GG75|A0A2L1GG75\_9VIRU -SNAAESINLS--FK-----GTI--TQRTMERGRIFAHNLAFA-----WL 107  
TR|I1Y9U4|I1Y9U4\_9VIRU FEPALLDKN--E-----QFSFVISFLTYLQNTK-----74  
TR|A0A1B4ZA68|A0A1B4ZA68\_9VIRU VFSARGDDV--Q-----SCLFLRRFCK-----IS 71  
TR|A0A2Z1Q3B3|A0A2Z1Q3B3\_9VIRU LVPSARDFS--S-----P-----PSASSMKR--TP-----LS 72  
TR|D0TZ29|D0TZ29\_9VIRU AVPSRPAPS--D-----KLSASFWSWCSFPFS-----68  
TR|A0A7G3W8V4|A0A7G3W8V4\_9VIRU -----  
TR|A0A2Z5WAD8|A0A2Z5WAD8\_9VIRU NVPTG---RL-----NPEPFGCIE---GDVRIGSLSFGDAPYIQPSLE---- 44

lc1|ORF2 DGT-T-SAIAGG-----CYLALWSGWARPAVMRLGRAPTAEAILHLLGNTHKCM 373  
TR|H6UNN1|H6UNN1\_9VIRU -SL-V-KYVDGG-----CYAIGWKATAHAFAVKLLSGLPTAAQIMRLWIATDPQ 139  
TR|H6UNM9|H6UNM9\_9VIRU DDV-V-ATLKDC-----CYLLGFPVSARPHAFEYLARRLVSDIKRYAALTDPOG 142  
TR|A0A7G4WLZ4|A0A7G4WLZ4\_9VIRU DAT-V-SASDGL-----CYLLAWTPEYRYCVLSLLGFARRVGMIRDLYQRSHKGA 156  
TR|A0A1P8DF80|A0A1P8DF80\_9VIRU DAT-V-SASDGL-----CYLLAWTPEYRYCVLSLLGFVRRVGMIRDLYQRSHKGA 156  
TR|A0A514DCE7|A0A514DCE7\_9VIRU NKLSPSFFSFL-----FFLFS--TLSFPFLV-----ARVLVFIFFL--QNTLV 94  
TR|A0A514D1M0|A0A514D1M0\_9VIRU -----  
TR|A0A7S5WL3|A0A7S5WL3\_9VIRU AGLRSAFL--C-----LSLFL--FLASPFVCLLISFIPPAFIFLFFSEHSPGG 69  
TR|A0A515KU39|A0A515KU39\_9VIRU KRSRLSFFPLYL-----FLFFC--FLNSPFIIVLFSFLPALVFYLFSEPVPGV 165  
TR|A0A7S5WLX7|A0A7S5WLX7\_9VIRU AVLARFKAAYF-----LCLFG--FLASPFIVLIFSLLPPALVFYFIFYMPSLGV 83  
TR|A0A7S5WL4|A0A7S5WL4\_9VIRU AMGSRFMVAFLC-----FLLF--VLISPLVVLVLECIPPALVALSFFLLTNPGV 69  
TR|A0A0M4L069|A0A0M4L069\_9VIRU AMRAKFMAFLC-----FVFFM--ALVTPFVVLFIISFVPLALLFFSFFY--LLPGV 68  
TR|A0A7S5WLW1|A0A7S5WLW1\_9VIRU AVLARFKAAYF-----LCLFG--FLASPLVVLVLSFLPPALVFYFIFYMPSLGV 83  
TR|A0A0A7DSJ8|A0A0A7DSJ8\_9VIRU AFF-TSFVALFE-----REIYS--VFLSPYLL---IL-----111  
TR|A0A2Z1Q370|A0A2Z1Q370\_9VIRU GTS-RSFFLLWS-----FFL--FVSPVLFPA--GIAASVVLVCWCWI--LLNL 166  
TR|E7BMX6|E7BMX6\_9VIRU AFF-TSFVALFE-----REIYS--VFLSPHLL---IL-----110  
TR|A0A7L9R666|A0A7L9R666\_9VIRU ALF-TSFVALFE-----REIYS--VFISPHLL---IL-----111  
TR|A0A346P9C1|A0A346P9C1\_9VIRU RKMSHPHLEYGHLVPGGELNGVXILC--LPLPGHFRLLGGELPPVSRN-----SI 200  
TR|A0A2Z5WAE5|A0A2Z5WAE5\_9VIRU QIILV-----A--LS-ATSL-----VLRT-----SI 111  
TR|A0A2L1GG75|A0A2L1GG75\_9VIRU QIILV-----A--LS-ATSL-----VLRA-----SI 125  
TR|I1Y9U4|I1Y9U4\_9VIRU NIL-SYFAARFE-----CYISS--IFLTPYIL---VS-----100  
TR|A0A1B4ZA68|A0A1B4ZA68\_9VIRU AL--LSFVSRWF-----CFLLS--F--PFSF--FAL--ALMRCF--DLPLG 105  
TR|A0A2Z1Q3B3|A0A2Z1Q3B3\_9VIRU ALF-RSFWRWFF-----LYISS--FFSALSSF--FAI--SLLRCF--DLPGF 110  
TR|D0TZ29|D0TZ29\_9VIRU -----FVVLRF-----LFFLS--FTVSSFFSFLRYFI--SFVTCA-----100  
TR|A0A7G3W8V4|A0A7G3W8V4\_9VIRU -----  
TR|A0A2Z5WAD8|A0A2Z5WAD8\_9VIRU -----RTDYVLKIENQTIAGLYKYS--ETPRSEWVRFLTERAKASAAALR-----86

lc1|ORF2 RHDSWRF-----CAVRG-GTEF-----VHILPDR-FGVSGKTLRLAMPASS 412  
TR|H6UNN1|H6UNN1\_9VIRU -----R-----CNPRV-----KLS---RS- 150  
TR|H6UNM9|H6UNM9\_9VIRU -----L-----NRRNV-----PVL---LSN 154  
TR|A0A7G4WLZ4|A0A7G4WLZ4\_9VIRU KRPSAKIFF--TRVCATTPRGGHY-----HHI-----SAATPAQK 189  
TR|A0A1P8DF80|A0A1P8DF80\_9VIRU KRPSAKIFF--TRVCATTPRGGHY-----HHI-----SAATPAQK 189  
TR|A0A514DCE7|A0A514DCE7\_9VIRU SRGI-HLLI---AVCPLW--FI-----DPLVKFM-LRD---E-LAIG-FRR 129  
TR|A0A514D1M0|A0A514D1M0\_9VIRU -----  
TR|A0A7S5WL3|A0A7S5WL3\_9VIRU VNLK-NLVI-----PQTY---E-----SLRLEN-ERT---V-LSPG-RAR 99  
TR|A0A515KU39|A0A515KU39\_9VIRU PSLK-NLVI-----PLTY---E-----ELHQRN-IQE---E-LSPG-RAR 195  
TR|A0A7S5WLX7|A0A7S5WLX7\_9VIRU LNRK-NLVI-----PPTY---E-----SLRSS--TPL---E-LSSG-RQR 112  
TR|A0A7S5WL4|A0A7S5WL4\_9VIRU SNRK-NLVI-----PPTY---E-----SLRNN--RPL---E-LSAG-KQR 98  
TR|A0A0M4L069|A0A0M4L069\_9VIRU LGRK-NLVI-----PPTY---E-----SLRSS--TPL---H-QSSG-RQR 97  
TR|A0A7S5WLW1|A0A7S5WLW1\_9VIRU FNRK-NLVI-----PPTY---E-----SLRSS--TPL---N-QSSG-RQR 112

|    |            |                  |                                                               |     |
|----|------------|------------------|---------------------------------------------------------------|-----|
| TR | A0A0A7DSJ8 | A0A0A7DSJ8_9VIRU | -----RSNIAQ---QT-----V--SPAL-YNF-----PS--RH                   | 131 |
| TR | A0A2Z1Q370 | A0A2Z1Q370_9VIRU | FFDSNQLVEALFQFNTIKW---RF-----AYM----                          | 190 |
| TR | E7BMX6     | E7BMX6_9VIRU     | -----RSNIAQ---QT-----V--SPAL-YNF-----PS--RH                   | 130 |
| TR | A0A7L9R666 | A0A7L9R666_9VIRU | -----RSNIAQ---QT-----V--SPAL-YNF-----PS--RH                   | 131 |
| TR | A0A346P9C1 | A0A346P9C1_9VIRU | TAAVWSLLLS-YLVTAITFVSTEFSSALQTDYAYGHTIRPRL--AYV-GQI----H-P--  | 250 |
| TR | A0A2Z5WAE5 | A0A2Z5WAE5_9VIRU | KPA--ELLVR-MLLDHADWVEK-LGVERVREAIGEAVGEKVEI--AYV-GRV----H-LPS | 160 |
| TR | A0A2L1GG75 | A0A2L1GG75_9VIRU | KPA--ELLIR-MLLDHADWVEK-LGVERVREAIGEAVGEKVEI--AYV-GRV----H-LPS | 174 |
| TR | I1Y9U4     | I1Y9U4_9VIRU     | -----HSNLAQ---QT-----V--SPAL-YSF-----PQ--RM                   | 120 |
| TR | A0A1B4ZA68 | A0A1B4ZA68_9VIRU | FVMQ-D-----LSSSLKW---ER-----V--TPTL-LTR---N-FAYG--RP          | 134 |
| TR | A0A2Z1Q3B3 | A0A2Z1Q3B3_9VIRU | FLMH-D-----LSCSLKW---ER-----V--TPTL-LTR---N-FAFG--SS          | 139 |
| TR | D0TZ29     | D0TZ29_9VIRU     | -----SPLSS---RN-----S--RPRR--AS---A-LAFG-RSD                  | 122 |
| TR | A0A7G3W8V4 | A0A7G3W8V4_9VIRU | -----                                                         |     |
| TR | A0A2Z5WAD8 | A0A2Z5WAD8_9VIRU | -RQAN-----PLCRALFSALQTIRASARPTRGAGLLHNPANSPYAQSGGGIAFGQVRK    | 138 |

|     |            |                  |                                                          |     |
|-----|------------|------------------|----------------------------------------------------------|-----|
| 1c1 | ORF2       | ----             | RVGFS---ECVVNTH-SASFTRYEQLSDSPFFSLLIRSLISFVFSFVY-GALD    | 462 |
| TR  | H6UNN1     | H6UNN1_9VIRU     | -----NADP-----                                           | 154 |
| TR  | H6UNM9     | H6UNM9_9VIRU     | -----KVGLP-----                                          | 159 |
| TR  | A0A7G4WLZ4 | A0A7G4WLZ4_9VIRU | ----RD--K-----                                           | 192 |
| TR  | A0A1P8DF80 | A0A1P8DF80_9VIRU | ----RD--K-----                                           | 192 |
| TR  | A0A514DCE7 | A0A514DCE7_9VIRU | ----NVKIP---FCSP-----YGFETCLF-----                       | 146 |
| TR  | A0A514D1M0 | A0A514D1M0_9VIRU | -----                                                    |     |
| TR  | A0A7S5WL3  | A0A7S5WL3_9VIRU  | ----LA-V-----TLKVIL-----                                 | 108 |
| TR  | A0A515KU39 | A0A515KU39_9VIRU | ----LA-L-----TLKLLF-----                                 | 204 |
| TR  | A0A7S5WLX7 | A0A7S5WLX7_9VIRU | ----LA-L-----TIMCLF-----                                 | 121 |
| TR  | A0A7S5WLV4 | A0A7S5WLV4_9VIRU | ----LA-L-----TLNLLL-----                                 | 107 |
| TR  | A0A0M4L069 | A0A0M4L069_9VIRU | ----LA-L-----TLKCLF-----                                 | 106 |
| TR  | A0A7S5WLW1 | A0A7S5WLW1_9VIRU | ----LA-L-----TLKCLF-----                                 | 121 |
| TR  | A0A0A7DSJ8 | A0A0A7DSJ8_9VIRU | AYSMSLYRW---SCIPLLLY-SYGFLSFSQ-----AEH                   | 160 |
| TR  | A0A2Z1Q370 | A0A2Z1Q370_9VIRU | ----QESHs---TCLWKSRL-SLGFTTERL-----LD                    | 214 |
| TR  | E7BMX6     | E7BMX6_9VIRU     | TYHMLGYRW---SCIPLLLY-SYGFLSFSQ-----AEH                   | 159 |
| TR  | A0A7L9R666 | A0A7L9R666_9VIRU | AYSMSLYRW---SCIPLLLY-SYGFLSFSQ-----AEH                   | 160 |
| TR  | A0A346P9C1 | A0A346P9C1_9VIRU | ---LAFKEQ---TCLWEYFL-GCGLDAFQLAM-----LGITPLTSRLSTAQASALS | 294 |
| TR  | A0A2Z5WAE5 | A0A2Z5WAE5_9VIRU | TYKVTRSPA---TCLWLWLVCDLGFNPVVLAL-----HGVPWYSYSITPAFSALL- | 207 |
| TR  | A0A2L1GG75 | A0A2L1GG75_9VIRU | TYKVTRSPA---TCLWLWLVCDLGFNPVVLAL-----HGVPWYSYSITPAFSALL- | 221 |
| TR  | I1Y9U4     | I1Y9U4_9VIRU     | AYDLLGYRW---NCIPLLLY-SYGFISLAQ-----AER                   | 149 |
| TR  | A0A1B4ZA68 | A0A1B4ZA68_9VIRU | HHDLLSEMT---TCIPLALY-DFNIIISFSQ-----ALR                  | 163 |
| TR  | A0A2Z1Q3B3 | A0A2Z1Q3B3_9VIRU | HHDLLAERT---TCIPLALY-DFNIIISFSQ-----ALR                  | 168 |
| TR  | D0TZ29     | D0TZ29_9VIRU     | SINFLAHYT---TCIPLLLT-SYGLISPSQ-----ALH                   | 151 |
| TR  | A0A7G3W8V4 | A0A7G3W8V4_9VIRU | -----                                                    |     |
| TR  | A0A2Z5WAD8 | A0A2Z5WAD8_9VIRU | ---RLVKYWRPRVNKYWKLL-VAAYFDLRIK-----                     | 166 |

|     |            |                                                            |                                                             |     |
|-----|------------|------------------------------------------------------------|-------------------------------------------------------------|-----|
| 1c1 | ORF2       | FGERILCKQIPKHFPTRPSLRKNGCYCLELPHPIWHPFVA-----SLLGPKPPIRILR | 515                                                         |     |
| TR  | H6UNN1     | H6UNN1_9VIRU                                               | -----SVHH---LEL-----LHLGAS--LEG--                           | 170 |
| TR  | H6UNM9     | H6UNM9_9VIRU                                               | -----EYHVPHYIIPA-----PHSDPLPRGPA--                          | 181 |
| TR  | A0A7G4WLZ4 | A0A7G4WLZ4_9VIRU                                           | -----SCDT-----VQSIFTNLDT---THNTCLLGLAARVTA--                | 221 |
| TR  | A0A1P8DF80 | A0A1P8DF80_9VIRU                                           | -----SCDT-----VQSIFTNLDT---SHNSCLLGLAARVTA--                | 221 |
| TR  | A0A514DCE7 | A0A514DCE7_9VIRU                                           | TA-----TVEQFGYLPVTFILGMKP---CDTRYNIRVVVKHYGLAKMRLPFFASRPG-- | 194 |
| TR  | A0A514D1M0 | A0A514D1M0_9VIRU                                           | -----                                                       |     |
| TR  | A0A7S5WL3  | A0A7S5WL3_9VIRU                                            | SN-----RKS-----LA---TDGVFHTYVAGTDVVQKEP-AIIPANCG--          | 142 |
| TR  | A0A515KU39 | A0A515KU39_9VIRU                                           | TG-----RET-----IP---SSEGKEHKIWCCAIVTVELP-PAIPNSNG--         | 238 |
| TR  | A0A7S5WLX7 | A0A7S5WLX7_9VIRU                                           | SN-----RTP-----DP---NQKPSPCYVEG--IIPPQPIGISA-AAG--          | 153 |
| TR  | A0A7S5WLV4 | A0A7S5WLV4_9VIRU                                           | AD-----RLA-----EE---HLVPITHLDAN--LLPKQPLAIKASSSG--          | 140 |
| TR  | A0A0M4L069 | A0A0M4L069_9VIRU                                           | SN-----RAA-----DP---HPKSPPSYAEG--IIPPQPIGISA-VAG--          | 138 |
| TR  | A0A7S5WLW1 | A0A7S5WLW1_9VIRU                                           | SN-----RVP-----DP---CQKPSLCHAEG--IIPPQPIGISA-VAG--          | 153 |
| TR  | A0A0A7DSJ8 | A0A0A7DSJ8_9VIRU                                           | FR-----NVQKFSDLPLSLRMSILR---H-RRSAILVRVSFQHVENLLAAPTGT--    | 205 |
| TR  | A0A2Z1Q370 | A0A2Z1Q370_9VIRU                                           | MG-----IAPWMTSLQRSTKLLKLP---S---LP---LYYT---LP-FNSRLG--     | 249 |
| TR  | E7BMX6     | E7BMX6_9VIRU                                               | FR-----NIQKFSDLPLSLRMSILR---H-RRSAILVRVSFQHVENVLAPSTTG--    | 204 |
| TR  | A0A7L9R666 | A0A7L9R666_9VIRU                                           | FR-----NIQKFSDLPLSLRMSILR---H-RRSAILVRVSHQHVENVLAPPTTG--    | 205 |
| TR  | A0A346P9C1 | A0A346P9C1_9VIRU                                           | TG-----TNGFFIAYLRVGKTGLT---NHI-----                         | 316 |
| TR  | A0A2Z5WAE5 | A0A2Z5WAE5_9VIRU                                           | -----KSLGITGLP---GKITWARKSH--IHHVQALT-----                  | 234 |
| TR  | A0A2L1GG75 | A0A2L1GG75_9VIRU                                           | -----KSLGIIGLP---GKITWARKSH--IHHVQALS-----                  | 248 |
| TR  | I1Y9U4     | I1Y9U4_9VIRU                                               | FR-----NIRKFSDLPLSLRASILR---S-RRSAILVRVFPKHVESLLAPNTSNA--   | 195 |
| TR  | A0A1B4ZA68 | A0A1B4ZA68_9VIRU                                           | LR-----YVTSFSELPRPIRNSLAR---S-RHSRLLFRLYPGHIESSLRPI-LAF--   | 208 |
| TR  | A0A2Z1Q3B3 | A0A2Z1Q3B3_9VIRU                                           | LK-----HVTSAQLPRPIKESLAR---S-RHSRLLFRLYPGHIESSLRPI-LNF--    | 213 |
| TR  | D0TZ29     | D0TZ29_9VIRU                                               | LS-----YVTKFTDLPKSLRDGILR---D-SRSHLLVRVYNRHVQSLLAQ--LKG--   | 196 |
| TR  | A0A7G3W8V4 | A0A7G3W8V4_9VIRU                                           | -----                                                       |     |
| TR  | A0A2Z5WAD8 | A0A2Z5WAD8_9VIRU                                           | -----VQRIPRSLSKIRAR-----IEKKLLNASPDR----                    | 192 |

|     |      |                                                                 |     |
|-----|------|-----------------------------------------------------------------|-----|
| 1c1 | ORF2 | FLYVTLPLFLDFRVNFIIVAKDMLDCDGRPVYHVVFATTGGSEVGRRTARGVLWALDADARLG | 575 |
|-----|------|-----------------------------------------------------------------|-----|

|    |            |                  |                                              |     |
|----|------------|------------------|----------------------------------------------|-----|
| TR | H6UNN1     | H6UNN1_9VIRU     | -----SVLFSEAVASVSMT                          | 184 |
| TR | H6UNM9     | H6UNM9_9VIRU     | -----EILFWHLLDILPVG                          | 195 |
| TR | A0A7G4WLZ4 | A0A7G4WLZ4_9VIRU | -----ARASDSDEV-                              | 231 |
| TR | A0A1P8DF80 | A0A1P8DF80_9VIRU | -----ARASDSDEV-                              | 231 |
| TR | A0A514DCE7 | A0A514DCE7_9VIRU | -----LPSVPHVSLFEFTGSFP-----HPTFAYLATHD----   | 222 |
| TR | A0A514D1M0 | A0A514D1M0_9VIRU | -----                                        |     |
| TR | A0A7S5WL3  | A0A7S5WL3_9VIRU  | -----FSLFLQ-----RTNN----                     | 152 |
| TR | A0A515KU39 | A0A515KU39_9VIRU | -----FSIVLQ-----ATAN----                     | 248 |
| TR | A0A7S5WLX7 | A0A7S5WLX7_9VIRU | -----YSLFLQ-----VNNN----                     | 163 |
| TR | A0A7S5WL4  | A0A7S5WL4_9VIRU  | -----YSLFLQ-----VNNN----                     | 150 |
| TR | A0A0M4L069 | A0A0M4L069_9VIRU | -----YSLFLQ-----VNNN----                     | 148 |
| TR | A0A7S5WLW1 | A0A7S5WLW1_9VIRU | -----YSLFLQ-----VNNN----                     | 163 |
| TR | A0A0A7DSJ8 | A0A0A7DSJ8_9VIRU | -----PYEL-----ISLRILLNST----                 | 219 |
| TR | A0A2Z1Q370 | A0A2Z1Q370_9VIRU | -----HVS-----TKYFP-----NSKFGFPLRLA-MK        | 270 |
| TR | E7BMX6     | E7BMX6_9VIRU     | -----SYEL-----LSLRILLNSE----                 | 218 |
| TR | A0A7L9R666 | A0A7L9R666_9VIRU | -----SYEL-----VSLRILLNST----                 | 219 |
| TR | A0A346P9C1 | A0A346P9C1_9VIRU | -----STSPFKCSKLT-----RLPIDFL-----            | 334 |
| TR | A0A2Z5WAE5 | A0A2Z5WAE5_9VIRU | -----SGDPLKLIS-----LKTL-----                 | 247 |
| TR | A0A2L1GG75 | A0A2L1GG75_9VIRU | -----SRDPLKLIS-----LKML-----                 | 261 |
| TR | I1Y9U4     | I1Y9U4_9VIRU     | -----HCLS-----ISLRELLNSP----                 | 209 |
| TR | A0A1B4ZA68 | A0A1B4ZA68_9VIRU | -----NYKL-----VTLGQMLHST----                 | 222 |
| TR | A0A2Z1Q3B3 | A0A2Z1Q3B3_9VIRU | -----NYRL-----VTLRQMLTTT----                 | 227 |
| TR | D0TZ29     | D0TZ29_9VIRU     | -----KYEL-----APLRCLLTSA----                 | 210 |
| TR | A0A7G3W8V4 | A0A7G3W8V4_9VIRU | -----                                        |     |
| TR | A0A2Z5WAD8 | A0A2Z5WAD8_9VIRU | -----MISVIGGAVASLV-KAGHSQAAAEMHNRMMHMLNGN-IA | 229 |

|     |            |                                                            |                                                               |     |
|-----|------------|------------------------------------------------------------|---------------------------------------------------------------|-----|
| 1c1 | ORF2       | QFTSPEDQDTSQLLAKSSVAVNAIAPLGGVRQVPTSLPIPQI-SPGFTRRWAPNIFPT | 634                                                           |     |
| TR  | H6UNN1     | H6UNN1_9VIRU                                               | DRIG--SSSDSDGGVKAREVYSPQSVAALGGVRLVPTSLPVPQL-APGFNQPWAPTWTPT  | 241 |
| TR  | H6UNM9     | H6UNM9_9VIRU                                               | AQ---LGSDEGSLNAKSAYSAPIEALGGVRVPTNIPAMQL-APGYARHWSFDLWAP      | 250 |
| TR  | A0A7G4WLZ4 | A0A7G4WLZ4_9VIRU                                           | -----AKRVKDSGLKPAFSGTTPPISALGGVREVPTSLIVPRL-GDGYNRKWSTELFAT   | 284 |
| TR  | A0A1P8DF80 | A0A1P8DF80_9VIRU                                           | -----AKRVKDSGLKPAFSGTTPPISALGGVREVPTSLIVPRL-GDGYNRKWSTELFAT   | 284 |
| TR  | A0A514DCE7 | A0A514DCE7_9VIRU                                           | --HLDPRGDDTSDKRVIDTFLSPAVPALGGVRVTLQMPVTGV-SRSLTERWYPGKFPR    | 279 |
| TR  | A0A514D1M0 | A0A514D1M0_9VIRU                                           | -----                                                         |     |
| TR  | A0A7S5WL3  | A0A7S5WL3_9VIRU                                            | --KRAHSLTGNIDGPVPTDRDFLSASIPALGGVRHVLTEYMTGVL-SSDLKTRWDPLRFPR | 209 |
| TR  | A0A515KU39 | A0A515KU39_9VIRU                                           | --RAHSLTGNIAAGPVPTKDFLSASIPALGGVRHVLTEYMTGVL-SSDLKTGWDPPLRFPR | 305 |
| TR  | A0A7S5WLX7 | A0A7S5WLX7_9VIRU                                           | --RLMHTLNGNIAASLRPVQDFLSAAIPGLGGVRHVLTEYTTGVM-SSNLKERWSPLRYPR | 220 |
| TR  | A0A7S5WL4  | A0A7S5WL4_9VIRU                                            | --RRMHALNGNIANLRPVQDFLSAAIPGLGGVRHVLTEYTTGVM-SSNLKERWSPLRYPR  | 207 |
| TR  | A0A0M4L069 | A0A0M4L069_9VIRU                                           | --RLMHTLNGNIAASLRPVQDFLSAAIPGLGGVRHVLTEYTTGVM-STN1KERWSPLRYPR | 205 |
| TR  | A0A7S5WLW1 | A0A7S5WLW1_9VIRU                                           | --RLMHTLNGNIAASLRPVQDFLSAAIPGLGGVRHVLTEYTTGVM-SSNLKERWSPLRYPR | 220 |
| TR  | A0A0A7DSJ8 | A0A0A7DSJ8_9VIRU                                           | --ADYLATPYSTAESKPTMEFSTPSVPALGGARAVLTQLPTSAR-AAGLSKKWSPHMYPT  | 276 |
| TR  | A0A2Z1Q370 | A0A2Z1Q370_9VIRU                                           | --YQFGATPG--KENEIKTSFSLNPIPLGGVKITLSQLPTETK-APDFDTKWTPSFFSP   | 325 |
| TR  | E7BMX6     | E7BMX6_9VIRU                                               | --AAYFATPYSTAESKPTMEFSTPSVPALGGARAVLTQLPTSAR-AAGLSKKWSPQMYPT  | 275 |
| TR  | A0A7L9R666 | A0A7L9R666_9VIRU                                           | --TAYLATPYSTAESKPTMEFSTPSVPALGGARAVLTQLPTSAR-AAGLSKKWSPHMYPT  | 276 |
| TR  | A0A346P9C1 | A0A346P9C1_9VIRU                                           | --TK---VHVFGELQAGSVTAPAIQALGGVRQVITSLINGRL-SGEAGKGWDWSLWPT    | 388 |
| TR  | A0A2Z5WAE5 | A0A2Z5WAE5_9VIRU                                           | --TA--FSFGAAEELTVTGSYTAKEALGGVHMAPTSLPAERIASGGISRIWDWSLWPT    | 303 |
| TR  | A0A2L1GG75 | A0A2L1GG75_9VIRU                                           | --TA--FSFGAAEELTVTGSYTAKEALGGVHMAPTSLPAERIASGGISRIWDWSLWPT    | 317 |
| TR  | I1Y9U4     | I1Y9U4_9VIRU                                               | --TEYLSTPYSTAEPNPTMEFSTPSVPALGGARAVLTQLPTSAR-AAGLNKKWAPTLYPT  | 266 |
| TR  | A0A1B4ZA68 | A0A1B4ZA68_9VIRU                                           | --TTILATPYSQKEATPSMELTSPTLPLGGVRSVLTQLATSYSR-APNLNDRWHPTLFP   | 279 |
| TR  | A0A2Z1Q3B3 | A0A2Z1Q3B3_9VIRU                                           | --STILATPYTQKEATPSMELTSPTLPLGGVRSVLTQLATSYSR-APNLNDRWHPTLFP   | 284 |
| TR  | D0TZ29     | D0TZ29_9VIRU                                               | --QEFLTPPYTEAECLKVSSAYSSPAIPALGGIRGVLTLQVLTGSK-ATGISNRWHPGHYP | 267 |
| TR  | A0A7G3W8V4 | A0A7G3W8V4_9VIRU                                           | -----                                                         |     |
| TR  | A0A2Z5WAD8 | A0A2Z5WAD8_9VIRU                                           | QFFNDVPLTQTGDMNVFGSVKTSDDPLLGAVTVLTYELFGDA--PHSDARVGPETFYR    | 287 |

|     |            |                                                               |                                                              |        |
|-----|------------|---------------------------------------------------------------|--------------------------------------------------------------|--------|
| 1c1 | ORF2       | SLTSQPLEW-VRD-AQGHLLALSRESEFTYHYHPEDSSLSRLPTRFSATLLSKWFFRR--- | E 689                                                        |        |
| TR  | H6UNN1     | H6UNN1_9VIRU                                                  | QATDDLQW-RRVDAQGRVSHLRTSNYVRHYPAELNNPRLPQAFSDTLESHWFREL---   | P 297  |
| TR  | H6UNM9     | H6UNM9_9VIRU                                                  | QVLEDPIQW-TPYLRGNDNAVVRTSDFVYHYPELDNPLPKTFSAHLSQNWFAQS---    | E 306  |
| TR  | A0A7G4WLZ4 | A0A7G4WLZ4_9VIRU                                              | QMIIEDIDW-TLSQNDHDVYFVRESEFVYHFPDELQNPRLPRHFTDNATFKWVSA--    | QD 341 |
| TR  | A0A1P8DF80 | A0A1P8DF80_9VIRU                                              | QMIIEDVDW-TLSQNDHDVHFNRESEFVYHFPDELQNPRLSRHFTDNATFKWVSA--    | QD 341 |
| TR  | A0A514DCE7 | A0A514DCE7_9VIRU                                              | QMHTTAVDW-HVQRDPGALRVHRSNEYTRMFPDSSTRARLPSLFTDTMPTLLFTPT-RE- | 336    |
| TR  | A0A514D1M0 | A0A514D1M0_9VIRU                                              | -----                                                        |        |
| TR  | A0A7S5WL3  | A0A7S5WL3_9VIRU                                               | QMTNIASDF-KLPNKDEDLGINRDNQYVRHFPKLMTPQLPQFVSTLRALIAFKR-NDE   | 267    |
| TR  | A0A515KU39 | A0A515KU39_9VIRU                                              | QMTNIASDF-KLFNRDEDLGINRDNQYVRHFPKLMTPQLPQFVSTLRALIAFKR-NDQ   | 363    |
| TR  | A0A7S5WLX7 | A0A7S5WLX7_9VIRU                                              | QMTNSAIAW-RQTGDREDIFIDNPNEYVRHFPEIMTNPQLPEYFVHHLKMLSFLR-SDH  | 278    |
| TR  | A0A7S5WL4  | A0A7S5WL4_9VIRU                                               | QMTNSAIAW-RQTGDREDIFIDNPNEYVRHFPEIMTNPQLPEYFVHHLKMLSFLR-SDH  | 265    |
| TR  | A0A0M4L069 | A0A0M4L069_9VIRU                                              | QMTNSAIAW-RQAGDREDIFIDNPNEYVRHFPEIMTNPQLPEYFVHHLKMLSFLR-SDH  | 263    |
| TR  | A0A7S5WLW1 | A0A7S5WLW1_9VIRU                                              | QMTNSAIAW-RQTGDREDIFIDNPNEYVRHFPEIMTNPQLPEYFVHHLKMLAFLR-SDH  | 278    |
| TR  | A0A0A7DSJ8 | A0A0A7DSJ8_9VIRU                                              | QAVDQRVVF-DVTAR--GIKSLRENNFVRSFPENLPQPRQPTHFSELLTSILAGRLSTST | 333    |
| TR  | A0A2Z1Q370 | A0A2Z1Q370_9VIRU                                              | SIVDRPLKH-A-YSQEGELITERESEFYRHYPPQGRVERLPSRFTETLKSVRWAPW--TL | 381    |
| TR  | E7BMX6     | E7BMX6_9VIRU                                                  | QAVDQRVVF-DVTAR--GIKSLRENNFVRSFPENLPQPRQPTHFSELLTSILAGRLSTST | 332    |
| TR  | A0A7L9R666 | A0A7L9R666_9VIRU                                              | QAVDQRVVF-DVTAR--GIKSLRENNFVRSFPENLPQPRQPTHFSELLTSILAGRLSTST | 333    |

|    |            |                  |                                                               |     |
|----|------------|------------------|---------------------------------------------------------------|-----|
| TR | A0A346P9C1 | A0A346P9C1_9VIRU | DMLRQRPTW-ILTNNNDIVSTRDSEFMRYFPEDTERTHLSQRFSETLKSVFVAFRASEAA  | 447 |
| TR | A0A2Z5WAE5 | A0A2Z5WAE5_9VIRU | SLLSERVVAKVFGGAGGDIGIERSSTFYRHFPDTEITQLPERFESFLQSAFCFRVLG--   | 361 |
| TR | A0A2L1GG75 | A0A2L1GG75_9VIRU | SLLSERVVAKVFGGAGGDIGIERSSTFYRHFPDTEITQLPERFESFLQSAFCFRALG--   | 375 |
| TR | I1Y9U4     | I1Y9U4_9VIRU     | QAVDQRVVF-ETTAR--TIKTLRESNYVRSYPENLPQPRQPEHSELLGSIVAARLTNSQ   | 323 |
| TR | A0A1B4ZA68 | A0A1B4ZA68_9VIRU | QATDVHNVY-EFAHR--RVNVVRRHNYIRSFPANHPNARQPEHFEDKSYTAILARE-APY  | 335 |
| TR | A0A2Z1Q3B3 | A0A2Z1Q3B3_9VIRU | QATDVHNVY-EFSHR--RINVVRRHNYIRSFPANHPNARQPEHFEDRSLTAILARE-APR  | 340 |
| TR | D0T2Z29    | D0T2Z29_9VIRU    | KAISQRLNY-RQVGT--EITYTERPNDYIRSFPDHISPPRLPEHFSDSLKSVIAGRTRDGN | 324 |
| TR | A0A7G3W8V4 | A0A7G3W8V4_9VIRU | -----                                                         |     |
| TR | A0A2Z5WAD8 | A0A2Z5WAD8_9VIRU | TTTDQPLLM---GSDTAGCISRPNAFTVHYPEGSNR--LDTRREDNLVSRVMSHS----   | 337 |

|     |            |                  |                                                              |     |
|-----|------------|------------------|--------------------------------------------------------------|-----|
| 1c1 | ORF2       |                  | VDEAGCVTTAYNRRFEPDTP-----SRTTLDEFSaIGQVLDGN-MSLDVLKADADAGG   | 740 |
| TR  | H6UNN1     | H6UNN1_9VIRU     | DDAFARLPATYSRSFSPDVV-----TRSVLDEFTaIGQVMTNN-NSLEVLKEADAVG    | 348 |
| TR  | H6UNM9     | H6UNM9_9VIRU     | PSPDPTVVQCQYNRRFKPDIV-----ARSVLEEFSSIGLVMEGA-NNFDTLKDADSVA   | 357 |
| TR  | A0A7G4WLZ4 | A0A7G4WLZ4_9VIRU | GTPDRWLPTNYTRYFEPSTQ-----DRIVLEPFSaIGKMLSGE-LSLDVLKEADSSA    | 392 |
| TR  | A0A1P8DF80 | A0A1P8DF80_9VIRU | GTPDRWLPTNYTRYFEPSTQ-----DRIVLEPFSaIGKMLSGE-LSLDVLKEADSSA    | 392 |
| TR  | A0A514DCE7 | A0A514DCE7_9VIRU | -DRTHILSAQYDRRWNLQDP-----VRTLSGPYAALARVLDGD-TSRDALVAADQTV    | 386 |
| TR  | A0A514D1M0 | A0A514D1M0_9VIRU | -----                                                        |     |
| TR  | A0A7S5WL3  | A0A7S5WL3_9VIRU  | KGYNHKVECKFDRIWEPNSP-----NVRPLQERFVGLSGVLGAGS-LDQVSLKAAEQVG  | 319 |
| TR  | A0A515KU39 | A0A515KU39_9VIRU | KEYNHRVECKFDRIWEPNSP-----NVRPLQERFVGLSGVLGAGS-LDQVSLKAAEQVG  | 415 |
| TR  | A0A7S5WLX7 | A0A7S5WLX7_9VIRU | RDHHHVIPDTDFSRWEPKKP-----NERPLQERFVGFAGVLGAGS-LDHASLQAAERVG  | 330 |
| TR  | A0A7S5WL4  | A0A7S5WL4_9VIRU  | RDHHHVIPDTDFSRWEPKKP-----NERPLQERFVGFAGVLGAGS-LDHASLQAAERVG  | 317 |
| TR  | A0A0M4L069 | A0A0M4L069_9VIRU | RDYHHIIPDTDFSRWEPKKP-----NERPLQERFVGFAGVLGAGS-LDHASLQAAERVG  | 315 |
| TR  | A0A7S5WLW1 | A0A7S5WLW1_9VIRU | RDHHHVIPDTDFSRWEPKKP-----NERPLQERFVGFAGVLGAGS-LDHASLQAAERVG  | 330 |
| TR  | A0A0A7DSJ8 | A0A0A7DSJ8_9VIRU | ASAAANTVPTQFNRSWQRQPI-----VDRTLAPQHaGLASVLEGIDYSKQSLAAEQAV   | 386 |
| TR  | A0A2Z1Q370 | A0A2Z1Q370_9VIRU | GNYTLLNIPVSYNQKSWISPA-----SHRLPATDFLDLAGLFGSA-TDPATLKAQDRV   | 433 |
| TR  | E7BMX6     | E7BMX6_9VIRU     | APAANTVATQFNRSWQRQPI-----VDRTLAPQHaGLASVLEGIDYSKQSLAAEQAV    | 385 |
| TR  | A0A7L9R666 | A0A7L9R666_9VIRU | AAAANTVPAQFNRSWQRQPI-----VDRTLAPHHaGLASVLEGIDYSKQSLAAEQAI    | 386 |
| TR  | A0A346P9C1 | A0A346P9C1_9VIRU | PLGNTIKDVAYTRSFIPSTL-----NRVLRTRYMALAPIMEGK-TDKEAFTNAQQLL    | 498 |
| TR  | A0A2Z5WAE5 | A0A2Z5WAE5_9VIRU | --GDATPAAQFTRSFRTPI-----NPELRPFASDLAGYLSGE-VGAEPFKQAAGVL     | 410 |
| TR  | A0A2L1GG75 | A0A2L1GG75_9VIRU | --GDATPAAQFTRSFRTPI-----NPELRPFASDLAGYLSGE-VGAEPFKQAAGVL     | 424 |
| TR  | I1Y9U4     | I1Y9U4_9VIRU     | AAGAHSPASFNRSWQRHPI-----IDRTLSPQHaGLASVLEGVDYSKQALASAEQAI    | 376 |
| TR  | A0A1B4ZA68 | A0A1B4ZA68_9VIRU | SNYAHSVPTSFNRNWMRAPI-----TDRILEQTHAGLANILDGSDYTRASFQAAEQAV   | 388 |
| TR  | A0A2Z1Q3B3 | A0A2Z1Q3B3_9VIRU | AAHAHSVPTGFNRNWMRSPFI-----TDRILEQTHAGLANILDGSDYTRASFQAAEQAV  | 393 |
| TR  | D0T2Z29    | D0T2Z29_9VIRU    | SPAAQAVPVDFTRNWAPRPL-----NDRVLSARAEGLSGILQGIDYSKSSLRNADEAL   | 377 |
| TR  | A0A7G3W8V4 | A0A7G3W8V4_9VIRU | -----                                                        |     |
| TR  | A0A2Z5WAD8 | A0A2Z5WAD8_9VIRU | -----HVRNNYVGKYVDVAPDQRHPGLGGPSRLEAASDVTGFWADH-QDPDQLKRAEIAL | 391 |

|     |            |                  |                                                               |     |
|-----|------------|------------------|---------------------------------------------------------------|-----|
| 1c1 | ORF2       |                  | SFSRALGSRNQRLVPGWEAGVIPRWLQFRDFAIKAAARRAYKEFCFRVASRYTLATVASD  | 800 |
| TR  | H6UNN1     | H6UNN1_9VIRU     | GFSRALGSRGQRLVPGWEANIINRWQRFRELATRSNNLSYKEFSYRIASRYVLSQATAD   | 408 |
| TR  | H6UNM9     | H6UNM9_9VIRU     | SFSRALGSRGQRLVPGWEAAIVPRWQRFRLATRSSTARSYQEFaFRAVSRYICAETVGD   | 417 |
| TR  | A0A7G4WLZ4 | A0A7G4WLZ4_9VIRU | AFGRAMGSRGQRLIPGWEAGLTTWRQFRDFGTRQKISQHFLEFCYRLITRYIISRVTAQ   | 452 |
| TR  | A0A1P8DF80 | A0A1P8DF80_9VIRU | AFGRAMGSRGQRLIPGWEAGLTTWRQFRDFGTRQKISQHFLEFCYRLITRYIISRVTAQ   | 452 |
| TR  | A0A514DCE7 | A0A514DCE7_9VIRU | AIDRFLDTRGNRQVERWEADQWPRWMLATFCSWANTRQSYFEAAAYRLWTRYFFARIFED  | 446 |
| TR  | A0A514D1M0 | A0A514D1M0_9VIRU | -----SRYIGAMAHD                                               | 11  |
| TR  | A0A7S5WL3  | A0A7S5WL3_9VIRU  | AINRFLDSRGNRQVTRWEADQWGRWLRVANFAAFSGENFSYTVAFRLWARFYACQAANA   | 379 |
| TR  | A0A515KU39 | A0A515KU39_9VIRU | AINRFLDSRGNRQVTRWEADQWGRWLRVANFAAFSGENFSYTVAFRLWARFFACQAANA   | 475 |
| TR  | A0A7S5WLX7 | A0A7S5WLX7_9VIRU | AINRFLDSRGNRQVAQWEAEQWGRWLRVSQFAGTSGDDFCYMQAAYRLWARWFTLQSGSL  | 390 |
| TR  | A0A7S5WL4  | A0A7S5WL4_9VIRU  | AINRFLDSRGNRQVAQWEAEQWGRWLRVSQFAGTSGDDFCYMQAAYRLWARWFTLQASL   | 377 |
| TR  | A0A0M4L069 | A0A0M4L069_9VIRU | AINRFLDSRGNRQVAQWEAEQWGRWLRVSQFAGTSGDDFCYMQAAYRLWARWFTLQSGSL  | 375 |
| TR  | A0A7S5WLW1 | A0A7S5WLW1_9VIRU | AINRFLDSRGNRQVAQWEAEQWGRWLRVSQFAGTSGDDFCYMQAAYRLWARWFTLQSGSL  | 390 |
| TR  | A0A0A7DSJ8 | A0A0A7DSJ8_9VIRU | SINRFLDTRGNRIIPRWEADQWNRWSGITSLYSLGQSDRSYLQIAYRLLSRYFFSLLAEE  | 446 |
| TR  | A0A2Z1Q370 | A0A2Z1Q370_9VIRU | AHLRFLGSRGDRILINGWQADNIPRGLRFSaFVRQAMRNHDYREIAFRLWSRLFLVDEFSA | 493 |
| TR  | E7BMX6     | E7BMX6_9VIRU     | SINRFLDTRGNRIIPRWEADQWNRWSGITSLYSLGQSDRSYLQIAYRLLSRYFFSLLAEE  | 445 |
| TR  | A0A7L9R666 | A0A7L9R666_9VIRU | SINRFLDTRGNRIIPRWEADQWNRWSGITSLYSLGQADRSYLQIAYRLLSRYFFSLLAEE  | 446 |
| TR  | A0A346P9C1 | A0A346P9C1_9VIRU | SQHRFFGSKGRMIGDWDALMSRNQEIYELAGRA-RVREYRELAYRLWSKYLLANQTES    | 557 |
| TR  | A0A2Z5WAE5 | A0A2Z5WAE5_9VIRU | GLNRFLYTRGNRIIVVGWEANDYNRGLDIQRAYMHA-RVTEFRATAIRLWARYFVAVQARD | 469 |
| TR  | A0A2L1GG75 | A0A2L1GG75_9VIRU | GLNRFLYTRGNRIIVVGWEANDYNRGLDIQRAYMHA-RVTEFRATAIRLWARYFVAVQARD | 483 |
| TR  | I1Y9U4     | I1Y9U4_9VIRU     | SVNRFLDTRGNRIIVPRWEADQWNRWSGITSLYTLGQSDRNYFQICYRLLSRYFFSLLSEK | 436 |
| TR  | A0A1B4ZA68 | A0A1B4ZA68_9VIRU | GMNRFLDTRGNKTVPRWEADAWNRSGLTNLFQIGKADRSYYQIAYRLLSRYYAALVAQE   | 448 |
| TR  | A0A2Z1Q3B3 | A0A2Z1Q3B3_9VIRU | GMNRFLDTRGNKTVPRWEADAWNRSGLTNLFQIGKADRSYYQIAYRLLSRYYAALVAQE   | 453 |
| TR  | D0T2Z29    | D0T2Z29_9VIRU    | SINRYLDTRGAKIIVPRWEGDQWNRWSGITSLFTVAARDRNYLSIAYRLLSRYYAALVAQE | 437 |
| TR  | A0A7G3W8V4 | A0A7G3W8V4_9VIRU | -----                                                         |     |
| TR  | A0A2Z5WAD8 | A0A2Z5WAD8_9VIRU | SSHRATGMRGQKLILGWEATSPTRQIELRRIALADAEGSCYKRFFYRLWMRYFLAALSEC  | 451 |

|     |            |                  |                                                   |     |
|-----|------------|------------------|---------------------------------------------------|-----|
| 1c1 | ORF2       |                  | VCS-----NVPEYERHVIDTTTQVQIIHINAEPPIAPPQ-PNQPPPIPP | 842 |
| TR  | H6UNN1     | H6UNN1_9VIRU     | LLA-----HIPDYMPVEDTSTDITIIHINADSIVPPPPPGGGPPPLP   | 451 |
| TR  | H6UNM9     | H6UNM9_9VIRU     | FIT-----RVPGYRRHVANTATDIQIIHINADSIIPPPAPGAPPAP    | 460 |
| TR  | A0A7G4WLZ4 | A0A7G4WLZ4_9VIRU | ALN-----RIQRYAPNVGDTHVHADIVINAATIVPAPPAPGVPAPALP  | 495 |
| TR  | A0A1P8DF80 | A0A1P8DF80_9VIRU | ALN-----RIQRYAPNVGDTHVHADIVINAATIVPAPPAPGVPAPALP  | 495 |

|    |            |                  |                                                             |     |
|----|------------|------------------|-------------------------------------------------------------|-----|
| TR | A0A514DCE7 | A0A514DCE7_9VIRU | FHS-----SNPTATMGVDGTGTACVLTFINAV-----PVT---GPNA             | 480 |
| TR | A0A514D1M0 | A0A514D1M0_9VIRU | LNA-----SVPGTTVHVANSATLTQITYINAATPIPPPGAPGAPPV-I            | 53  |
| TR | A0A7S5WL3  | A0A7S5WL3_9VIRU  | -----GNTSVKAVTPLQGTGVPLTFINAR-----PVT---GPNA                | 410 |
| TR | A0A515KU39 | A0A515KU39_9VIRU | -----GNTSVRAVTPPLQGTGVTLTFINAR-----PVT---GPNA               | 506 |
| TR | A0A7S5WLX7 | A0A7S5WLX7_9VIRU | -----GGAGYNVCPQPGTDIGLTFINAR-----AVL---GPNA                 | 421 |
| TR | A0A7S5WL4  | A0A7S5WL4_9VIRU  | -----GGAGYEVVCPRPQTDIGLTFINAR-----AVL---GPNA                | 408 |
| TR | A0A0M4L069 | A0A0M4L069_9VIRU | -----GGAGYNIVCPQPGTDIGLTFINAR-----AVL---GPNA                | 406 |
| TR | A0A7S5WLW1 | A0A7S5WLW1_9VIRU | -----GGAGYNVCPQPGTDIGLTFINAR-----AVL---GPNA                 | 421 |
| TR | A0A0A7DSJ8 | A0A0A7DSJ8_9VIRU | -----LSELTPLVTTAGTATTLTGLTTLTLLAPPFPPIPGQPIPLP              | 485 |
| TR | A0A2Z1Q370 | A0A2Z1Q370_9VIRU | LREWN-----GTLDLPLYADMRLNPNPGGTPIALTFINAEAPAA-----PP         | 534 |
| TR | E7BMX6     | E7BMX6_9VIRU     | -----LPEMTPLVTTVGTNTTLTGLTTLTLLAPPAPPVPGQPIPLP              | 484 |
| TR | A0A7L9R666 | A0A7L9R666_9VIRU | -----LPELTPLVTTVGSNTTLTGLTTLTLLAPPAPPVPGQPIPLP              | 485 |
| TR | A0A346P9C1 | A0A346P9C1_9VIRU | MMR-----TLQGGTPTVINTAARCVITHMNAHYIPANP-----TAVPPLPV         | 598 |
| TR | A0A2Z5WAE5 | A0A2Z5WAE5_9VIRU | LLR-----DEPAYARNVDDPSTRVAITHINAQYIPPL-----AGNPA             | 506 |
| TR | A0A2L1GG75 | A0A2L1GG75_9VIRU | LLR-----DEPAYARNVDDPSTRAAITHINAQYVPP-----AGNPA              | 520 |
| TR | I1Y9U4     | I1Y9U4_9VIRU     | -----LPGMTPVNNRQGTQAALTGLTTLTLLAPPATPVPGQPIPLP              | 475 |
| TR | A0A1B4ZA68 | A0A1B4ZA68_9VIRU | -----PFEFRLAPTAIGTNVLTPLSTQLPPV---PFGAPAPQV                 | 484 |
| TR | A0A2Z1Q3B3 | A0A2Z1Q3B3_9VIRU | -----FPDFQLAPVAIGTGVALTPLSTQLPPV---PFGAPAPQV                | 489 |
| TR | D0TZ29     | D0TZ29_9VIRU     | -----NDWFTPTVMDESTPITLPLTAEIPPLQLPIPGQPQV                   | 476 |
| TR | A0A7G3W8V4 | A0A7G3W8V4_9VIRU | -----                                                       |     |
| TR | A0A2Z5WAD8 | A0A2Z5WAD8_9VIRU | NDATGADAPSVLTQLRPLTAADIDYDPQGLNGANRIQLESVSAVAPLVAG-----PGGP | 505 |

|     |            |                  |                                                                |     |
|-----|------------|------------------|----------------------------------------------------------------|-----|
| 1c1 | ORF2       |                  | QWGEAALW-----TPAMLQAVLDGRAQFIDGESYTREELAEIIAC LAPSTHDNVPHLRP   | 897 |
| TR  | H6UNN1     | H6UNN1_9VIRU     | IWGEQAFW-----DPNMQQAMIDGRAQFVDGEGFSPEEIAAIIIGCLAPSAANVPYIVAP   | 506 |
| TR  | H6UNM9     | H6UNM9_9VIRU     | IWGEQQLW-----DPNMTQAMLEGRAQLIDGEGFSREELAAVVGCLAPSTYENVPQLIFE   | 515 |
| TR  | A0A7G4WLZ4 | A0A7G4WLZ4_9VIRU | VNGEDAFW-----APGAQQALLEGRAQFLDCEGEMERSEIAQLLGCLDQSTDNLPVLSD    | 550 |
| TR  | A0A1P8DF80 | A0A1P8DF80_9VIRU | VNGEDAFW-----APGAQQALLEGRAQFLDCEGEMERSEIAQLLGCLDQSTDNLPVLSD    | 550 |
| TR  | A0A514DCE7 | A0A514DCE7_9VIRU | PNPEGPMW-----TDDAQSGKNGTKQFIDAQGLSENELLELISALAPLDDKDYIPHFL     | 535 |
| TR  | A0A514D1M0 | A0A514D1M0_9VIRU | VNGEDHYW-----DYAAQTALLQGTQAFLDVEGLSRAEIAQALAAIVPTTHENVPFVRNQ   | 108 |
| TR  | A0A7S5WL3  | A0A7S5WL3_9VIRU  | LNPEGPMW-----TDDAQDGLRMGTQKQFIDAEGELSEPELIELLSCMLPFNDIDHATHLV  | 465 |
| TR  | A0A515KU39 | A0A515KU39_9VIRU | LNPEGPMW-----TDDAQDGLRMGTQKQFIDAEGELSEPELIELLTCMLPFSDIDHAAHLY  | 561 |
| TR  | A0A7S5WLX7 | A0A7S5WLX7_9VIRU | PNPEGPMW-----TDDAQMGLQDGSKQFIDAEGELSEELIELISVLAPVRNGNQLQMES    | 476 |
| TR  | A0A7S5WL4  | A0A7S5WL4_9VIRU  | PNPEGPMW-----TDDAQMGLQDGSKQFIDAEGELSEELIELISVLAPVRNGNQLQMN     | 463 |
| TR  | A0A0M4L069 | A0A0M4L069_9VIRU | PNPEGPMW-----TDDAQMGLQDGSKQFIDAEGELSEELIELISVLAPVRNGNQLQMES    | 461 |
| TR  | A0A7S5WLW1 | A0A7S5WLW1_9VIRU | PNPEGPMW-----TDDAQMGLQDGSKQFIDAEGELSEELIELISVLAPVRSGNQLQMES    | 476 |
| TR  | A0A0A7DSJ8 | A0A0A7DSJ8_9VIRU | VNPEAALF-----TQAAFSGLKTGTQAQLVDAEGLSEDELIELISAIVPLESANIPLLST-  | 539 |
| TR  | A0A2Z1Q370 | A0A2Z1Q370_9VIRU | VNPEQPMW-----EDIAQAGLRAGSKQFVDASDLSEQEVIELLSAMVPTEPGQSVRLRAA   | 589 |
| TR  | E7BMX6     | E7BMX6_9VIRU     | VNPEAALF-----TQAAFSGLKTGTQAQLVDAEGLSEDELIELLSAIVPVESANIPLLST-  | 538 |
| TR  | A0A7L9R666 | A0A7L9R666_9VIRU | VNPEAALF-----TQAAFSGLKTGTQAQLVDAEGLSEDELIELLSAIVPVESANIPLLST-  | 539 |
| TR  | A0A346P9C1 | A0A346P9C1_9VIRU | LNPEAPFW-----DPAAQLELTGKYKQFFDVSGMSKEQIAALIGCLDSTDLDRVPRLHID   | 653 |
| TR  | A0A2Z5WAE5 | A0A2Z5WAE5_9VIRU | VNPEAPLW-----TQAAQDGLAVGTQKQFIDAQGMSIDQVAELVGVMSPITVDNLP SLRLV | 561 |
| TR  | A0A2L1GG75 | A0A2L1GG75_9VIRU | VNPEAPLW-----TQAAQDGLAVGTQKQFIDAQGMSIDQVAELVGVMSPITVDNLP SLRLV | 575 |
| TR  | I1Y9U4     | I1Y9U4_9VIRU     | VNPEAALF-----TQAAFSGLKTGTQFVDAEGLSEDELVELLSAIVPVEHANIPLLRT-    | 529 |
| TR  | A0A1B4ZA68 | A0A1B4ZA68_9VIRU | QNPEAPLF-----APGAFEGKNGTKQFIDAEGELSEVVELLSAIVPQSRPQRLQFSRI     | 539 |
| TR  | A0A2Z1Q3B3 | A0A2Z1Q3B3_9VIRU | QNPEAPLF-----APGAFEGKNGTKQFIDAEGELSEVVELLSAIVPQGRQRLQFSKV      | 544 |
| TR  | D0TZ29     | D0TZ29_9VIRU     | GNPEAPLF-----TAAAFNGLRNGTKQFIDAEGLSLEELRELLAAIVPCDEANIPHVRY    | 531 |
| TR  | A0A7G3W8V4 | A0A7G3W8V4_9VIRU | -----                                                          |     |
| TR  | A0A2Z5WAD8 | A0A2Z5WAD8_9VIRU | VDPEAILKSDQHGAADTWDEIQRGATHLIDVEGMTDEMIRETLAFAANEVRYASSAWGF    | 565 |

|     |            |                  |                                                            |     |
|-----|------------|------------------|------------------------------------------------------------|-----|
| 1c1 | ORF2       |                  | VDPND-----PDTKETMLPS--CARYSYPNGVTHIIVHHGNAP                | 933 |
| TR  | H6UNN1     | H6UNN1_9VIRU     | HPDSTH-----PLVSRTDRLPN--VTRHYFPNGTTHIIVHHGNSP              | 545 |
| TR  | H6UNM9     | H6UNM9_9VIRU     | EDVIEE-----GQEEFAQHYPY--VTRQTFPNVTRHIIVHHGSAP              | 554 |
| TR  | A0A7G4WLZ4 | A0A7G4WLZ4_9VIRU | D-----MNVLQVPV--IGRHTFPNGVQTIFVHTGNQP                      | 580 |
| TR  | A0A1P8DF80 | A0A1P8DF80_9VIRU | D-----MNVLQVPV--IGRHTFPNGVQTIFVHTGNQP                      | 580 |
| TR  | A0A514DCE7 | A0A514DCE7_9VIRU | NSGDG-----DVKYINP--FMRYLFLNGTDEIFIHGNSP                    | 568 |
| TR  | A0A514D1M0 | A0A514D1M0_9VIRU | NPAAQG-----VARNERLEWLLH--IWRNIYPNGVCNVFLHFGNEP             | 147 |
| TR  | A0A7S5WL3  | A0A7S5WL3_9VIRU  | RKKDTSNSEGESSEKKGKRELTDLEKFKNTHHMLTG--PTRYVFPNGVDEIFIHGNSD | 523 |
| TR  | A0A515KU39 | A0A515KU39_9VIRU | RKKDTSNSEGESSEKKGKQELSNLQKFKNTHNFLTG--PTRYVFPNGVDEIFIHGNSD | 619 |
| TR  | A0A7S5WLX7 | A0A7S5WLX7_9VIRU | R-----NGVGPQQLYLF--PNRYLYDNGVDEIFIHFGNSA                   | 510 |
| TR  | A0A7S5WL4  | A0A7S5WL4_9VIRU  | R-----NGTGP HQLYLF--PNRYTFNNDVNEIFIHFGNSQ                  | 497 |
| TR  | A0A0M4L069 | A0A0M4L069_9VIRU | R-----NGAGPHQLYLF--PNRYLYDNGVDEIFIHFGNSA                   | 495 |
| TR  | A0A7S5WLW1 | A0A7S5WLW1_9VIRU | R-----NGVGP HQLYLF--PNRYLYDNGVDEIFIHFGNSA                  | 510 |
| TR  | A0A0A7DSJ8 | A0A0A7DSJ8_9VIRU | -A-----ADPAETFFAG--PTRYTYDNTVNEVFIHFGNSA                   | 571 |
| TR  | A0A2Z1Q370 | A0A2Z1Q370_9VIRU | DPPRVN-----GA---LPQEGPCNELDFVHP--LQRYSFPPNGVDEVFIHTGANA    | 633 |
| TR  | E7BMX6     | E7BMX6_9VIRU     | -A-----ANPPETFFAG--PTRYTYDNKVNEVFIHFGNSA                   | 570 |
| TR  | A0A7L9R666 | A0A7L9R666_9VIRU | -T-----ANPPETFFAG--PTRYTYDNKVNEVFIHFGNSV                   | 571 |
| TR  | A0A346P9C1 | A0A346P9C1_9VIRU | NG-----AGGHRVYWF--NGKFKFNNGVNEVFLHYGMGN                    | 686 |
| TR  | A0A2Z5WAE5 | A0A2Z5WAE5_9VIRU | NG-----D---SYHFG--QSRHSIPNQVDEIFVHWGTPE                    | 590 |
| TR  | A0A2L1GG75 | A0A2L1GG75_9VIRU | NG-----D---SYHFG--QSRHSIPNQVDEIFVHWGTPE                    | 604 |
| TR  | I1Y9U4     | I1Y9U4_9VIRU     | -A-----APHNEDYFVG--PTRYTYANGVDEVLIHFGNSA                   | 561 |



|    |            |                  |           |                                            |       |
|----|------------|------------------|-----------|--------------------------------------------|-------|
| TR | A0A1B4ZA68 | A0A1B4ZA68_9VIRU | ND-----   | QGREYFSG--PTRYTFGNSVNEVFIHYGNP             | 572   |
| TR | A0A2Z1Q3B3 | A0A2Z1Q3B3_9VIRU | ND-----   | QGREYFCG--PTRYTYDNRVNEVFIHYGNP             | 577   |
| TR | D0TZ29     | D0TZ29_9VIRU     | RPAD----- | LVQEIKPGSSAYHRYFFG--PTRYKYLNGVDEVFIHFGNPP  | 574   |
| TR | A0A7G3W8V4 | A0A7G3W8V4_9VIRU | -----     | -----                                      | ----- |
| TR | A0A2Z5WAD8 | A0A2Z5WAD8_9VIRU | A-----    | RRG--A-----AADEPGYYSALLPDRLLDCPTRFILHYGSRP | 603   |

|     |            |                  |                                                             |        |                            |     |
|-----|------------|------------------|-------------------------------------------------------------|--------|----------------------------|-----|
| lc1 | ORF2       |                  | LPSIQD-----                                                 | Q----- | NWIAQHAFSFPSSAMTLSTIIRSV   | 965 |
| TR  | H6UNN1     | H6UNN1_9VIRU     | IPPLAV-----                                                 | Q----- | AQIAATAFSYPSSAVLGSIMRAYCA  | 577 |
| TR  | H6UNM9     | H6UNM9_9VIRU     | IPPLAD-----                                                 | Q----- | QFIAAHAFDFPSAGILSTVLSYAA   | 586 |
| TR  | A0A7G4WLZ4 | A0A7G4WLZ4_9VIRU | VPSLAD-----                                                 | Q----- | QWIRDNAHSPDHDTIIGLIRSLCM   | 612 |
| TR  | A0A1P8DF80 | A0A1P8DF80_9VIRU | VPSPAD-----                                                 | Q----- | QWIRDNAHSPDHDTIIGLIRSLCM   | 612 |
| TR  | A0A514DCE7 | A0A514DCE7_9VIRU | IPDLAT-----                                                 | Q----- | GRITANVFSVPKPTAIASVLRLLAS  | 600 |
| TR  | A0A514D1M0 | A0A514D1M0_9VIRU | LPDQAT-----                                                 | R----- | NWIAQHANDAPDASIIISTVMRHFGS | 179 |
| TR  | A0A7S5WL3  | A0A7S5WL3_9VIRU  | IPDAAT-----                                                 | Q----- | QRIAESVFCPSAATIGSVIRYLAT   | 555 |
| TR  | A0A515KU39 | A0A515KU39_9VIRU | IPDANT-----                                                 | Q----- | QRISESVFCPSAATIGSVIRYLAT   | 651 |
| TR  | A0A7S5WLX7 | A0A7S5WLX7_9VIRU | IPDAAA-----                                                 | Q----- | QRIRERVHGVSSSATVGSVIRYLAT  | 542 |
| TR  | A0A7S5WL4  | A0A7S5WL4_9VIRU  | IPDAAT-----                                                 | Q----- | QRIRERVHGVSSSATVGSVIRYLAT  | 529 |
| TR  | A0A0M4L069 | A0A0M4L069_9VIRU | IPDAAA-----                                                 | Q----- | QRIRERVHGVSSSATVGSVIRYLAT  | 527 |
| TR  | A0A7S5WLW1 | A0A7S5WLW1_9VIRU | IPDAAT-----                                                 | Q----- | QRIRERVHGVSSSATVGSVIRYLAT  | 542 |
| TR  | A0A0A7DSJ8 | A0A0A7DSJ8_9VIRU | IP--D-----                                                  | Q----- | AQIATQVHRVPPQAQILSVLRYLAM  | 600 |
| TR  | A0A2Z1Q370 | A0A2Z1Q370_9VIRU | KFDLPA-----                                                 | L----- | QIRASVCGVPSASAIITLRLVLSV   | 665 |
| TR  | E7BMX6     | E7BMX6_9VIRU     | IP--D-----                                                  | L----- | AQLATEVHRIPHAAQILSVLRYLAM  | 599 |
| TR  | A0A7L9R666 | A0A7L9R666_9VIRU | VP--D-----                                                  | L----- | AQIATQVHRVPPQAQILSVLRYLAM  | 600 |
| TR  | A0A346P9C1 | A0A346P9C1_9VIRU | LSPSPAD-----                                                | Q----- | AWIAAHAFDFPSAVLASIIRIVAG   | 718 |
| TR  | A0A2Z5WAE5 | A0A2Z5WAE5_9VIRU | IPNAND-----                                                 | I----- | TYIANSAHRFPEVDIVDSVIRIFAG  | 622 |
| TR  | A0A2L1GG75 | A0A2L1GG75_9VIRU | IPNAND-----                                                 | I----- | AYIENFAHRFPEVDVVDVIRIFAG   | 636 |
| TR  | I1Y9U4     | I1Y9U4_9VIRU     | VP--D-----                                                  | L----- | AQIGALIHRAHQAKILSVLRYLAM   | 590 |
| TR  | A0A1B4ZA68 | A0A1B4ZA68_9VIRU | IP--NN-----                                                 | M----- | AQIAAQVHGTPNPNQILSVLRYLLM  | 602 |
| TR  | A0A2Z1Q3B3 | A0A2Z1Q3B3_9VIRU | IP--LN-----                                                 | M----- | AQLAAQVHRTPPQPNQILSVLRYLLM | 607 |
| TR  | D0TZ29     | D0TZ29_9VIRU     | APTPAE-----                                                 | M----- | ADLSAHVHAPPSAPAIMSVLRYLIM  | 606 |
| TR  | A0A7G3W8V4 | A0A7G3W8V4_9VIRU | -----                                                       | -----  | MSVLRYLAM                  | 9   |
| TR  | A0A2Z5WAD8 | A0A2Z5WAD8_9VIRU | GLNARVLENTLLGRGFPAPADPAAGIPAGPAIPGNPARSPWNVRPNRQLIASVIRFMIG | -----  | -----                      | 663 |

::\*

|     |            |                  |                                         |                                      |                       |      |
|-----|------------|------------------|-----------------------------------------|--------------------------------------|-----------------------|------|
| lc1 | ORF2       |                  | RHSLEDLFVWAFEAVAYRSVGTYF--              | ADALGTNEPTA----                      | TDDIIHASGVDPDLFLPRNCT | 1020 |
| TR  | H6UNN1     | H6UNN1_9VIRU     | RHALEESLIDAFDNALYRCTGFSF--              | AEARGSDPNSA----                      | TREIVDSSGSSALFLPRNNT  | 632  |
| TR  | H6UNM9     | H6UNM9_9VIRU     | RHALEDVILAADFASIYRCVGYPF--              | AAALGADRHHK----                      | SNVHVDSSGSAALYMPNNT   | 641  |
| TR  | A0A7G4WLZ4 | A0A7G4WLZ4_9VIRU | RHDLSTQFADAIIDMAVYRCVGYSF--             | EDCFGTSNDRR----                      | TDDIIDGSGNSELFIIPNNT  | 667  |
| TR  | A0A1P8DF80 | A0A1P8DF80_9VIRU | RHDLSTQFADAIIDMAVYRCVGYSF--             | EDCFGTSNDRR----                      | TDDIIDGSGNSELFIIPNNT  | 667  |
| TR  | A0A514DCE7 | A0A514DCE7_9VIRU | RHGAERDIIIDALETVMYRGVGYHS--             | DDFINRRKNYT----                      | SGEVLHSDGNWEFHSRLRNYT | 655  |
| TR  | A0A514D1M0 | A0A514D1M0_9VIRU | RHDLSSHFDIAIQTALYRTVGYKS--              | ADARGADPKI----                       | DNSILDADGHSRLYVPRNNT  | 234  |
| TR  | A0A7S5WL3  | A0A7S5WL3_9VIRU  | KHNAIRDLEQGLEAMLYRGVVFYS--              | DNITGKRENLG----                      | SKQYINADGNWQLHLPRDMT  | 610  |
| TR  | A0A515KU39 | A0A515KU39_9VIRU | KHNAIRDLEQGLEAVLYRGVVFYS--              | DNITAKRENLG----                      | SKQYINADGNWQLHLPRDLT  | 706  |
| TR  | A0A7S5WLX7 | A0A7S5WLX7_9VIRU | KHNAIKDLENGLEAVMLRGFVYKS--              | NMIRNRRANLR----                      | SRQYINADGNWGLYLPDRKT  | 597  |
| TR  | A0A7S5WL4  | A0A7S5WL4_9VIRU  | KHNAIKDLENGLEAVMLRGFVYKS--              | NMIRNRRANLR----                      | ARQYIHADGNWGLYLPDRKT  | 584  |
| TR  | A0A0M4L069 | A0A0M4L069_9VIRU | KHNAIKDLENGLEAVMLRGFVYKS--              | NMIRNRRANLR----                      | SRQYINADGNWGLYLPDRKT  | 582  |
| TR  | A0A7S5WLW1 | A0A7S5WLW1_9VIRU | KHNAIKDLENGLEAVMLRGFVYKS--              | NMIRNRRANLR----                      | SRQYINADGNWGLYLPDRKT  | 597  |
| TR  | A0A0A7DSJ8 | A0A0A7DSJ8_9VIRU | RHGAAQIDDALEILMARIVLYTNSTQLRGLRNNAP--   | -----                                | VGEYINSDGHYEMHLPLAKT  | 656  |
| TR  | A0A2Z1Q370 | A0A2Z1Q370_9VIRU | RHNASDHVDFGLELAMARNSIFSM--              | RDFLSRDNCN----                       | RHSYTHSDLNNEIHLPRMYT  | 720  |
| TR  | E7BMX6     | E7BMX6_9VIRU     | RHGAAQIDDALEILMARIVLYTNSTQLRGLRNNAP--   | -----                                | VGEYINSDGHYEMHLPLAKT  | 655  |
| TR  | A0A7L9R666 | A0A7L9R666_9VIRU | RHGAAQIDDALEILMARIVLYTNSTQLRGLRNNAP--   | -----                                | VGEYINSDGHYEMHLPLAKT  | 656  |
| TR  | A0A346P9C1 | A0A346P9C1_9VIRU | KLXIAEDYQTGLDLALHHGVVYRN--              | AD---IYNRLPNAPNQHNLIYASGNDELFLPRNVS  | 774                   |      |
| TR  | A0A2Z5WAE5 | A0A2Z5WAE5_9VIRU | KYGARSAIDIGCEYAMHKGVVYPV--              | AGPRGIRGRKPSSENSSTRYLSDGCDDEMHLPRDRT | 681                   |      |
| TR  | A0A2L1GG75 | A0A2L1GG75_9VIRU | KYGARSAIDIGCEYAMHKGVVYPV--              | AGPRGIRGRKPSSENSSTRYLSDGCDDEMHLPRDRT | 695                   |      |
| TR  | I1Y9U4     | I1Y9U4_9VIRU     | RHGAAADDIDNALETISRIVMYTNSTQLRGLRNNAP--  | -----                                | TGVYINSDGHYELHPLIAKT  | 646  |
| TR  | A0A1B4ZA68 | A0A1B4ZA68_9VIRU | RHGAGSDIEDAAELLISRIALYSTGSGRLRGLRNNAP-- | -----                                | NQEYINADGHYELHPLHPSKT | 658  |
| TR  | A0A2Z1Q3B3 | A0A2Z1Q3B3_9VIRU | RHGAGTDIDDAELLISRIALYSTGSGRLRGLRNNAP--  | -----                                | NQEYINADGHYELHPLHPSKT | 663  |
| TR  | D0TZ29     | D0TZ29_9VIRU     | RHGASEVDVTAMELLIARIYMYHPNVGLRGLRNNAP--  | -----                                | QDRYINADGHYSFHLPRAKT  | 662  |
| TR  | A0A7G3W8V4 | A0A7G3W8V4_9VIRU | RHGAAEDIDNAMETLMSRIVMYTNSTQLRGLRNNAP--  | -----                                | TGVYINADGHYELHPLPLAKT | 65   |
| TR  | A0A2Z5WAD8 | A0A2Z5WAD8_9VIRU | TTGAVKDCWDALDLALHTQNFSPSLDLVGLRDLGVR--  | GLNLRWTS CGGTQELSLPRDVT              | 720                   |      |

. :

. :

:

|     |            |                  |               |                   |                                   |      |
|-----|------------|------------------|---------------|-------------------|-----------------------------------|------|
| lc1 | ORF2       |                  | GFAYFDCFFV--  | PVSTTPELESYLSAP-- | TEVFSVSSISLAHFRAVSIWAGKAGSLLGRV   | 1077 |
| TR  | H6UNN1     | H6UNN1_9VIRU     | ARAYFDVFFS--  | PLATTSIAENLLSST-- | AKQYVHYGSLLGHVSRATSLAWAGKSASLVDSV | 689  |
| TR  | H6UNM9     | H6UNM9_9VIRU     | IRGYFDVFFS--  | PAPNSSNLENLLAMS-- | GKHLHTGTLVNHCRAVSLAWAGKSASILGVT   | 698  |
| TR  | A0A7G4WLZ4 | A0A7G4WLZ4_9VIRU | AGDYFDIFFT--  | PAPIDRDVEVFLSLQ-- | TKQLTHSASLAVHTRTVAYNWAAGKAGSMLGDI | 724  |
| TR  | A0A1P8DF80 | A0A1P8DF80_9VIRU | AGDYFDIFFT--  | PAPIDREVEVFLSLQ-- | TKQLTHSASLAVHTRTVAYNWAAGKAGSMLGDI | 724  |
| TR  | A0A514DCE7 | A0A514DCE7_9VIRU | AGGYFDALRV--  | PVPLDQKIQYSLALP-- | SEELINNLIFVSHARATSLWAAAFALSMGTGT  | 712  |
| TR  | A0A514D1M0 | A0A514D1M0_9VIRU | RWGYFDVIFYQ-- | PVALSSVVERFLSYS-- | PREIVNIGTILPFCIAIALNASKALTLTLLGE  | 291  |
| TR  | A0A7S5WL3  | A0A7S5WL3_9VIRU  | ASAYFDALRV--  | PLEPSQLQYVLAMH--  | PREVVQNSVLINHARAVSLNWAAYALSMLGQQ  | 667  |
| TR  | A0A515KU39 | A0A515KU39_9VIRU | ASAYFDALRV--  | PLEPSPKIQYMLAMH-- | PREVVQNSALVNHARAVSLNWAAYALSMLGQQ  | 763  |

|    |            |                  |                                                                |     |
|----|------------|------------------|----------------------------------------------------------------|-----|
| TR | A0A7S5WLX7 | A0A7S5WLX7_9VIRU | SSAYFDALRV--PLEPSPMIQYMLQMQ--PREVVKNALFLCHSRAVSLNWASYAISMLGQQ  | 654 |
| TR | A0A7S5WLX4 | A0A7S5WLX4_9VIRU | SSAYFDALRV--PLEPSPMIQYMLQMQ--PREVVKNALFLCHSRAVSLNWASYAISMLGQQ  | 641 |
| TR | A0A0M4L069 | A0A0M4L069_9VIRU | SSAYFDALRV--PLEPSPMIQYMLQMQ--PREVVKNALFLCHSRAVSLNWASYAISMLGQQ  | 639 |
| TR | A0A7S5WLW1 | A0A7S5WLW1_9VIRU | SSAYFDALRV--PLEPSPMIQYMLQMQ--PREVVKNALFLCHSRAVSLNWASYAISMLGQQ  | 654 |
| TR | A0A0A7DSJ8 | A0A0A7DSJ8_9VIRU | GSAYFDSFMV--PHAMTGDLPAPASLP--ARSVINNGVLFAQARAAALNWAAAWSMSGRS   | 713 |
| TR | A0A2Z1Q370 | A0A2Z1Q370_9VIRU | AGAYVDAFLT--PGTVSAQTDLALELK--PCEVVNNAALIGFFRTTAINWAAYSLSAYGRV  | 777 |
| TR | E7BMX6     | E7BMX6_9VIRU     | GSAYFDSFMV--PHAMTGDLPAPASLP--ARSVINNGVLFAQARAAALNWAAAWSMSGRS   | 712 |
| TR | A0A7L9R666 | A0A7L9R666_9VIRU | ASAYFDSFMV--PHAMTGDLPAPASLP--ARSVINNGVLFAQARAAALNWAAAWSMSGRS   | 713 |
| TR | A0A346P9C1 | A0A346P9C1_9VIRU | VDGYFVPFFE--PGVLQDSQPEMLAPNRRDDIIHVQSLISHARAVSLNWAAKAVTLLGQH   | 832 |
| TR | A0A2Z5WAE5 | A0A2Z5WAE5_9VIRU | FIGYFTPFLLT--SGTSLDLAATTLAPEVNVRLMSAQUALVAHTRATSLNWACKSITMLGDQ | 739 |
| TR | A0A2L1GG75 | A0A2L1GG75_9VIRU | FIGYFTPFLLT--SGTSLDLAATTLAPEVNVRLMSAQUALVAHTRATSLNWACKSITMLGDQ | 753 |
| TR | I1Y9U4     | I1Y9U4_9VIRU     | APAYFDSFMV--PHAQTGDLPAPASLP--ARSVINNGVLFAQARAAALNWAGAASWAGRS   | 703 |
| TR | A0A1B4ZA68 | A0A1B4ZA68_9VIRU | ASAYFDCFFV--PCFDTGTLGFFSSSLN--PELINQGVLFGNARAVSLNWAAATAWSMVGRS | 715 |
| TR | A0A2Z1Q3B3 | A0A2Z1Q3B3_9VIRU | ASAYFDCFFV--PCLDSGTLGYFSSFS--APELINQGVLFGNARVVALNWAAATAWSMVGRS | 720 |
| TR | D0TZ29     | D0TZ29_9VIRU     | ASAYFDAQFL--PADDTTRLNEFLSFS--SRELVNSGVLFQAARATALNWATAAYSMYGRQ  | 719 |
| TR | A0A7G3W8V4 | A0A7G3W8V4_9VIRU | ASAYFDSFMV--PHAQTGDLPAPASLP--ARSVINNGVLFAQARAAALNWAGAASWAGRS   | 122 |
| TR | A0A2Z5WAD8 | A0A2Z5WAD8_9VIRU | PTAYFDCARTRVPMYAPDISALLALS--PRRLFHTATLTAHAHAASLNWASFALSLRGE    | 779 |

\* . : . : \* . : .

|     |            |                  |                                                                 |      |
|-----|------------|------------------|-----------------------------------------------------------------|------|
| lc1 | ORF2       |                  | FNLAAN---QGNQFLRNHRTKWLRFY--ELNVWSALHANTMGFYGFAPSPTRRTES        | 1132 |
| TR  | H6UNN1     | H6UNN1_9VIRU     | FSAPAA---GGNQFIRNHRDKWLRLQYYS--ELNVWSALHANAQAQHFSPTRLTRTES      | 744  |
| TR  | H6UNM9     | H6UNM9_9VIRU     | WQOMGA---PVNQFVRNHRDKWLRLHYG--ELNIWSALHANAMAYQYGFAPSPHTRRTES    | 753  |
| TR  | A0A7G4WLZ4 | A0A7G4WLZ4_9VIRU | WAAPLA---GAPNDYVRNHATKWLRLNYYS--DINIWSGLAANAHATQYGFACASPLTRRTEL | 780  |
| TR  | A0A1P8DF80 | A0A1P8DF80_9VIRU | WAAPLA---GAPNDYVRNHATKWLRLNYYS--DINIWSGLAANAHATQYGFACASPLTRRTEL | 780  |
| TR  | A0A514DCE7 | A0A514DCE7_9VIRU | WANLPG---NEANQFVANHIDVWLRTYNNENLDLWATVSANAMAYQYGYAPSQRARSTE     | 769  |
| TR  | A0A514D1M0 | A0A514D1M0_9VIRU | WGMPVA---GGNQYLNRHWDKLARHYQSTVTLWSTIHANALAHQYGFAPPPICRAMEQ      | 347  |
| TR  | A0A7S5WLX7 | A0A7S5WLX7_9VIRU | WGVAPG---TATNQFIRNHVDVWLRLQYGIENINIWSTLHANAMALQYGFAPSSFARSTEG   | 724  |
| TR  | A0A515KU39 | A0A515KU39_9VIRU | WGVAPG---TATNQFIRNHVDVWLRLQYGIENINIWSTLHANAMALQYGFAPSTFARSTEG   | 820  |
| TR  | A0A7S5WLX7 | A0A7S5WLX7_9VIRU | WAARPG---QVANQFVRNHIDAWLRRFGIENINLWSTAHANAMAHQYGFAPSPATARATEE   | 711  |
| TR  | A0A7S5WLX4 | A0A7S5WLX4_9VIRU | WAARPG---QVANQFVRNHIDAWLRRFGIENINLWSTAHANAMAHQYGFAPSPATARATEE   | 698  |
| TR  | A0A0M4L069 | A0A0M4L069_9VIRU | WAARPG---QVANQFVRNHIDAWLRRFGIENINLWSTAHANAMAHQYGFAPSPATARATED   | 696  |
| TR  | A0A7S5WLW1 | A0A7S5WLW1_9VIRU | WAARPG---QVANQFVRNHIDAWLRRFGIENINLWSTAHANAMAHQYGFAPSPATARATEE   | 711  |
| TR  | A0A0A7DSJ8 | A0A0A7DSJ8_9VIRU | WVNSPG---RENNSYVRNHIDVFLRKYSDDLNLWTSNHNALAFHVGWLSLSTARSTE       | 770  |
| TR  | A0A2Z1Q370 | A0A2Z1Q370_9VIRU | WNRRPS---NEPDRIISFMSVLTTRTFSDKITAUSTVHNALAYQYGFGLSPSVRSTE       | 834  |
| TR  | E7BMX6     | E7BMX6_9VIRU     | WVNSPG---RENNSYVRNHIDVFLRKYSDDLNLWTSNHNALAFHVGWLSLSTARSTE       | 769  |
| TR  | A0A7L9R666 | A0A7L9R666_9VIRU | WVNSPG---RENNSYVRNHIDVFLRKYSDDLNLWTSNHNALAFHVGWLSLSTARSTE       | 770  |
| TR  | A0A346P9C1 | A0A346P9C1_9VIRU | WSAAAATPAAGLNMWLRNRIDAWIRDYNSYSNPSWSEMHINACATQFGFSITQRAAIMEA    | 892  |
| TR  | A0A2Z5WAE5 | A0A2Z5WAE5_9VIRU | WDARNV---RTANQWVRNHIDAIVRDYNSYDNAWSNHFANTTATQYSYSPSRDMRILEG     | 796  |
| TR  | A0A2L1GG75 | A0A2L1GG75_9VIRU | WDARNA---RTANQWVRNHIDAIVRDYNSYDNAWSNHFANATATQYSYSPSRDMRVLEG     | 810  |
| TR  | I1Y9U4     | I1Y9U4_9VIRU     | WVNTPG---TENNYSVRNHIDVFLRKYSDDLNLWTSNHNALAFHVGWLSLSTARSTE       | 760  |
| TR  | A0A1B4ZA68 | A0A1B4ZA68_9VIRU | WTNLPG---MEGNPFIRNHIDVWLRLRYSSDDLNLWSSCHNNTLALQYGFVGDARVRATEA   | 772  |
| TR  | A0A2Z1Q3B3 | A0A2Z1Q3B3_9VIRU | WTNLPG---TENNPFIRNHIDVWLRLRYSSDDLNLWSSCHNNTLALQYGFVGDARVRATEA   | 777  |
| TR  | D0TZ29     | D0TZ29_9VIRU     | WTNSPG---TE'NTYVVMKHVDVTLRKYYAEPLNVWASAHNNALAFVLDVALSSKALATEA   | 776  |
| TR  | A0A7G3W8V4 | A0A7G3W8V4_9VIRU | WVNAPG---TENNYSVRNHIDVFLRKYSDDLNLWTSNHNALAFHVGWLSLSTARSTE       | 179  |
| TR  | A0A2Z5WAD8 | A0A2Z5WAD8_9VIRU | WHAFTN---RAGVTQYQAHLDMSVAQLRRSDVTVWALHRIATAHMYGFAPALSTSLALG     | 837  |

: \* : . . :

|     |            |                  |                                                                 |      |
|-----|------------|------------------|-----------------------------------------------------------------|------|
| lc1 | ORF2       |                  | NMLPNWWRDYCTPTLVNHYLELWAMQVIPPVQVLPYYSREAKNSHVEWAPGTPDQTASLV    | 1192 |
| TR  | H6UNN1     | H6UNN1_9VIRU     | GFVPGWWRPYVPVLTNHYLELWSMHLMPYQVLPYWDPDQSSSHVQWAKGTPDQTASLQ      | 804  |
| TR  | H6UNM9     | H6UNM9_9VIRU     | GSVVDWWRAYTPPTLTNHYLELWAMQVIPPVQVLPYYPDREETSHVDWAAGTPDQTASLL    | 813  |
| TR  | A0A7G4WLZ4 | A0A7G4WLZ4_9VIRU | GRLPNNWRAYVAPYITNHYLELWCMQVMPFTFQVLPYFDQNAQTSHVWRWAEAGTPDQSESRI | 840  |
| TR  | A0A1P8DF80 | A0A1P8DF80_9VIRU | GRLPNNWRAYVAPYITNHYLELWCMQVMPFTFQVLPYFDQNAQTSHVWRWAEAGTPDQSESRI | 840  |
| TR  | A0A514DCE7 | A0A514DCE7_9VIRU | LRIAHFWSNFQIPTLTNHYHELMWMEIMPTFQVLPYHDNEG--TSHPTWDSGSPAPVADFA   | 828  |
| TR  | A0A514D1M0 | A0A514D1M0_9VIRU | GEVTDWLSFQAPYLANHYMELWAAKTMMPFQVLPYYPDGETSHVQWPGDTPRPVQVNL      | 407  |
| TR  | A0A7S5WLX7 | A0A7S5WLX7_9VIRU | LSVLNWWTDYQAPYLANAYHELMWMMEMIPSHQLLPFYDENT--PAHPTWVDGRPHPTTDFM  | 783  |
| TR  | A0A515KU39 | A0A515KU39_9VIRU | LTVLNWWTDYQAPYLANPYHELMWMMEMIPSHQLLPFYDENT--PAHPTWVDGRPHPTTDFM  | 879  |
| TR  | A0A7S5WLX7 | A0A7S5WLX7_9VIRU | LWVRNWWVDTQAPYLANPYLELWLMELIPSHQLLPFYDKEN--TVAPGQEPGSPMPALDFA   | 770  |
| TR  | A0A7S5WLX4 | A0A7S5WLX4_9VIRU | LWVRNWWVDTQAPYLANPYLELWLMELIPSHQLLPFYDKEN--TVAPGQEPGSPMPALDFA   | 757  |
| TR  | A0A0M4L069 | A0A0M4L069_9VIRU | LWVRNWWVDTQAPYLANPYLELWLMELIPSHQLLPFYDKEN--VAPGQEPGSPMPALDFA    | 755  |
| TR  | A0A7S5WLW1 | A0A7S5WLW1_9VIRU | LWVRNWWVDTQAPYLANPYLELWLMELIPSHQLLPFYDKEN--IVAPGQEPGSPMPALDFA   | 770  |
| TR  | A0A0A7DSJ8 | A0A0A7DSJ8_9VIRU | NVVVNWWNDYHSPTLTNAYLELWQVECLPSHQVLPWDDRET--PSTVSWPSNTPPFIHDAY   | 829  |
| TR  | A0A2Z1Q370 | A0A2Z1Q370_9VIRU | GWLLDAHRDWTVPYVHNHYLELWAMKFIPTFQVLPYFDPEGSSSHVWGPSSSLNPPIPAYE   | 894  |
| TR  | E7BMX6     | E7BMX6_9VIRU     | NVVVNWWNDYHSPTLTNAYLELWQVECLPSHQVLPWDDRET--PSTVSWPSNTPPFIHDAY   | 828  |
| TR  | A0A7L9R666 | A0A7L9R666_9VIRU | NVVVNWWNDYHSPTLTNAYLELWQVECLPSHQVLPWDDRET--PSTVSWPSNTPPFIHDAY   | 829  |
| TR  | A0A346P9C1 | A0A346P9C1_9VIRU | GTVQAQWPAWQAPYLANHYCELMWMMKIPSFQVLPYYPDREARTSKFIVNDDYGSAPVSLQ   | 952  |
| TR  | A0A2Z5WAE5 | A0A2Z5WAE5_9VIRU | QYVANVWQSFMVPTLTNHYHELMWAMDMIPEYQILPYFDRAAQTHHVTVDANQPSIVGDMV   | 856  |
| TR  | A0A2L1GG75 | A0A2L1GG75_9VIRU | QYVASVWQSFMVPTLTNHYHELMWAMDMIPEYQILPYFDRAAQTHHVTVDANQPSIVGDMV   | 870  |
| TR  | I1Y9U4     | I1Y9U4_9VIRU     | NVVVNWWADYHVPTLTNAYLELWQVENLPSHQVLPWEDKET--PSTVSWPSNTPPFIHDAY   | 819  |
| TR  | A0A1B4ZA68 | A0A1B4ZA68_9VIRU | GRVVNWWSDHQAPYMNPNYHELWLAELKPSHQVLPYDDANA--PSTVSWPAQTTPFISDMY   | 831  |
| TR  | A0A2Z1Q3B3 | A0A2Z1Q3B3_9VIRU | GRVVNWWSDHQAPYMNPNYHELWLAELKPSHQVLPYDDANA--PSTVSWPSQTTPFISDMY   | 836  |
| TR  | D0TZ29     | D0TZ29_9VIRU     | NVVVNWWSDHQAPYLTNPYHELMWQCNMLPSHQVLPYHVDN--PATITWPDNCPLPISDAH   | 835  |
| TR  | A0A7G3W8V4 | A0A7G3W8V4_9VIRU | NVVVNWWADYHVPTLTNAYLELWQVENLPSHQVLPWEDKET--PSTVSWPSNTPPFIHDAY   | 238  |

TR|A0A2Z5WAD8|A0A2Z5WAD8\_9VIRU RTVAPIWQDRLAPYIANPYEMWMLQMLPIHMKLPSK-----GTAMDWPDDAQKPLRSAY 892  
: \* : \* \* : \* . : \* . \*\*

lc1|ORF2 SFNHDRKVLRLAREVDVLEGHSLWDGGGAEYNSQFYAAQG----NNGRFAYEG-A--QPKA 1245  
TR|H6UNN1|H6UNN1\_9VIRU SFSADKKIRLARETEAFPGHAWLGDGGADYNAQFYVAQG----NDGQFAFEG-G--RHKA 857  
TR|H6UNM9|H6UNM9\_9VIRU TFSREKKIRLAPEMENRPGYHVLWDGGGAEYNAQFYAAQG----SNGQFSYEG-A--HPKS 866  
TR|A0A7G4WLZ4|A0A7G4WLZ4\_9VIRU SFRNNLNVRLAREFEAYPGHTWIGDGGSEFNQFYAAQG----NDGQFAYEG-A--LTKV 893  
TR|A0A1P8DF80|A0A1P8DF80\_9VIRU SFRNNLNVRLAREFEAYPGHTWIGDGGSEFNQFYAAQG----NDGQFAYEG-A--LTKV 893  
TR|A0A514DCE7|A0A514DCE7\_9VIRU SFQG--DVQLGRDLAAFTGRTWLGDGGYTHNAQFFAAQG----VDDQFRFEG-H--TPAF 879  
TR|A0A514D1M0|A0A514D1M0\_9VIRU AFNTARTLKAAREYDPIPGFSWLGDGGPEYNLQFYTAQG----NDGQWAKEG-G--AHKE 460  
TR|A0A7S5WL3|A0A7S5WL3\_9VIRU SFQN--WVEVARDLSPFSGRTWMSDGGATRNAQFYVAQG----VKNQFRFQG-G--QPKF 834  
TR|A0A515KU39|A0A515KU39\_9VIRU SFQN--WVEVARDLSPFSGRTWMSDGGATRNAQFYVAQG----VKNQFRFQG-G--QPKF 930  
TR|A0A7S5WLX7|A0A7S5WLX7\_9VIRU SFED--WVPVSRDLSPFSGCTWMSDGGMTRNAQFYAAQG----RNNQFRYEG-G--NPHF 821  
TR|A0A7S5WL4|A0A7S5WL4\_9VIRU SFED--WVPVSRDLSPFSGCTWMSDGGMTRNAQFYAAQG----RNNQFRYEG-G--NPHF 808  
TR|A0A0M4L069|A0A0M4L069\_9VIRU SFED--WVPVSRDLSPFSGCTWMSDGGMTRNAQFYAAQG----RNNQFRYEG-G--NPHF 806  
TR|A0A7S5WLW1|A0A7S5WLW1\_9VIRU SFED--WVPVSRDLSPFSGCTWMSDGGMTRNAQFYAAQG----RNNQFRYEG-G--NPHF 821  
TR|A0A0A7DSJ8|A0A0A7DSJ8\_9VIRU SFSSHLHVQVARDTPAEVGRRTFMGDGGAIANAQHFAAVG----TIGGFYED--AANAPKI 884  
TR|A0A2Z1Q370|A0A2Z1Q370\_9VIRU SFND--QVRLGRDMPFPLKQAWKQDGGFNRNAQFFAATG----LNGRYRHEG-A--AINV 945  
TR|E7BMX6|E7BMX6\_9VIRU SFSSHLHVQVARDTPAEVGRRTFMGDGGAIANAQHFAAIG----SVNGFRFED--AANAPKI 883  
TR|A0A7L9R666|A0A7L9R666\_9VIRU SFSSHLHVQVARDTPAEVGRRTFMGDGGAIANAQHFAAVG----SVNGFRYED--ATNAPKI 884  
TR|A0A346P9C1|A0A346P9C1\_9VIRU TFNASRELKVSREINAIPGRNYFGDGGSEYNGQLAAQGGGIGAGHWRFEN--AANAFRV 1011  
TR|A0A2Z5WAE5|A0A2Z5WAE5\_9VIRU TYNSQREVKVGRDRTTIFPGRNHIG--GGHEYNMQVYMAQGDFFENQQRWRFQP--GVQNRPP 914  
TR|A0A2L1GG75|A0A2L1GG75\_9VIRU TYNSQREVKVGRDRTTIFPGRNHIG--GGHEYNMQVYMAQGDFFENQQRWRFQP--GVQNRPP 928  
TR|I1Y9U4|I1Y9U4\_9VIRU SFAAHLHVQVARDTPAEVGRRTFMGDGGSTANAQHFAAIG----TLNGYRFES--AANTPAI 874  
TR|A0A1B4ZA68|A0A1B4ZA68\_9VIRU SFTQNTRELARVDPVETARSWMVDGGPTVNAQHLYAVG----NCLGYRFEQ--AANTPSV 886  
TR|A0A2Z1Q3B3|A0A2Z1Q3B3\_9VIRU SFSQNTRELARVPIETARSWMVDGGPTVNAQHLYAVG----RPTGYRFEQ--AANTPNV 891  
TR|D0T2Z9|D0T2Z9\_9VIRU SFANHLDELAKDFPAEAGRYWMDGGSTANAQFFAATG----LSSGFRFQG--HHNA--AL 889  
TR|A0A7G3W8V4|A0A7G3W8V4\_9VIRU SFTAHLHVQVARDTPAEIGRTFMGDGGSTANAQHFAAIG----TLNGYRFES--AANTPAI 293  
TR|A0A2Z5WAD8|A0A2Z5WAD8\_9VIRU ET--DMPSLRVARALPAFHRRFTLQDGKMMYNLQHAASVPG---QTHFRNDLVNPDTPAF 948  
: . \* \* \* : : :

lc1|ORF2 RFSFWQ--GSYARSFPVTPQAATP--ISLSNGRLNDPFADFILPGSFQSYRMLDDKIINWGV 1303  
TR|H6UNN1|H6UNN1\_9VIRU RLFFWD--GIYARSFPNAPVQGNL--LTMTNGALNQPFSDFLPGSLLSYRHQIDRILSWG 915  
TR|H6UNM9|H6UNM9\_9VIRU TVVFWG--QYARSFPNAPNAGNY--ISMTDNVLGLPFSDFILPGSLASYRLTDDRNLNWGI 924  
TR|A0A7G4WLZ4|A0A7G4WLZ4\_9VIRU GLCRWD--GIYARQLPAAPVAGRA--ITL--GAAGSPFSDFILPGSLASYQFGNDRIQNWAV 949  
TR|A0A1P8DF80|A0A1P8DF80\_9VIRU GLCRWD--GIYARQLPAAPVAGRA--ITL--GAAGSPFSDFILPGSLASYQFGNDRIQNWAV 949  
TR|A0A514DCE7|A0A514DCE7\_9VIRU QLAYWQ--HQMVHQFPQNPASFTP---VVMATQGSPPADFLPLPGSLAGINLERNRTYAWGV 935  
TR|A0A514D1M0|A0A514D1M0\_9VIRU QLMHGP--GETMDQPPVPTPTVPVQHQHQMGLPNPNWADFLPLPGSLRSYQTHNRRIRNWSI 519  
TR|A0A7S5WL3|A0A7S5WL3\_9VIRU KLSRWT--AQYQHQPQNADQDP---TWMEPLNSPFADFLPLPGSLPALNMATNRVYAWGV 890  
TR|A0A515KU39|A0A515KU39\_9VIRU KLSRWT--AQYQHQPQNADQDP---TWMEPLNSPFADFLPLPGSLPALNMSINRVYAWGV 986  
TR|A0A7S5WLX7|A0A7S5WLX7\_9VIRU QLSRWA--ARFRHQAPQNTANVDI---AWMGDLNEPFADFILPGSMPCLRMEANRVYAWGV 877  
TR|A0A7S5WL4|A0A7S5WL4\_9VIRU QLSRWA--ARFRHQAPQNTANVDI---AWMGDLNEPFADFILPGSMPCLRMEANRVYAWGV 864  
TR|A0A0M4L069|A0A0M4L069\_9VIRU QLSRWA--ARFRHQAPQNTANVDI---AWMGDLNEPFADFILPGSMPCIRMEVNRVYAWGV 862  
TR|A0A7S5WLW1|A0A7S5WLW1\_9VIRU QLSRWA--ARFRHQAPQNTANVDI---AWMGDLNEPFADFILPGSMPCLRMEANRVYAWGV 877  
TR|A0A0A7DSJ8|A0A0A7DSJ8\_9VIRU SIARWR--QRHAFQFPVAPASQAP---VWMAEPGSPFADFLSPGSMNSHNVEANVAYSIGL 940  
TR|A0A2Z1Q370|A0A2Z1Q370\_9VIRU SLMRWS--GDRIDQIPAPAGAPV---QWLAPAGSNFSDFILPGSVVNYNHSRNSYSFGF 1001  
TR|E7BMX6|E7BMX6\_9VIRU SIARWR--QRHAFQFPVAPASQAP---VWMAEPGSPFADFLSPGSMNSHNVEANVAYSIGL 939  
TR|A0A7L9R666|A0A7L9R666\_9VIRU SIARWR--QRHAFQFPVAPASQSP---VWMAEPGSPFADFLSPGSMNSHNVEANVAYSIGL 940  
TR|A0A346P9C1|A0A346P9C1\_9VIRU LDPCWSETPYAYQLGQAWNRV---QTVYMAAPGNFADFALPGTMRFTQEIDNVLSWGF 1068  
TR|A0A2Z5WAE5|A0A2Z5WAE5\_9VIRU MLPAYTQLEYSYQLANPVWTTTAQNVIMWEPGSPFADFIQPGSLRHYIQAGNRLLAWAA 974  
TR|A0A2L1GG75|A0A2L1GG75\_9VIRU MLPAYTQLEYSYQLANPVWTTTAQNVIMWEPGSPFADFIQPGSLRHYIQAGNRLLAWAA 988  
TR|I1Y9U4|I1Y9U4\_9VIRU SLARWR--QRHAYQFPVAPATQAP---VWLAEPGTPFADFLSPGSLNSHNVEANVAYSIGV 930  
TR|A0A1B4ZA68|A0A1B4ZA68\_9VIRU SLARWR--HRHPYQFPQAPANQNV---VWMDAGGSPFADFALPGSLPTVNLEQNVSYTHGL 942  
TR|A0A2Z1Q3B3|A0A2Z1Q3B3\_9VIRU SLARWR--QRHPYQFPQAPANQNV---VWMDAGGSPFADFALPGSIPTVNLEQNVSYTHGL 947  
TR|D0T2Z9|D0T2Z9\_9VIRU ALLRWR--NRSLSQLPQAPAAQEP---SWMGDLSTPFSDFLLPGSIATANISQNTAYSHAI 945  
TR|A0A7G3W8V4|A0A7G3W8V4\_9VIRU SLARWR--QRHAYQFPVTPATQAP---VWMAEPGTPFADFISPGSLNSHNVEANVSYSYGV 349  
TR|A0A2Z5WAD8|A0A2Z5WAD8\_9VIRU ELLSWE--YPTQYQLPAAPAGFQP---TWLAPAGSLFGAWLLPGSVQNYSSSRIRANGI 1004  
. . : \*\* : .

lc1|ORF2 NEVSEHQL--T--NSEARRWWLASKGTAHVSLMVNYVSPISQHYELDDLADYSVTIWEKD--G 1360  
TR|H6UNN1|H6UNN1\_9VIRU SDGSNNQL--T--PLEIQRWWLASKGRAHTSLMVNYVSPFAQHYERDVLADYTVTWEKD--S 972  
TR|H6UNM9|H6UNM9\_9VIRU KERTGVEL--T--PSEVRRWWSASKGLPHQSLMVNYISPSEHYEVDALSNTYTVTWEKD--S 981  
TR|A0A7G4WLZ4|A0A7G4WLZ4\_9VIRU QPNPRRPL--T--NQEASRWAAASKGQSNVSLMVNYVSPIAEHIEDSLADYSVWIENQ--S 1006  
TR|A0A1P8DF80|A0A1P8DF80\_9VIRU QPNPRRPL--T--NQEASRWAAASKGQSNVSLMVNYVSPIAEHIEDSLADYSVWIENQ--S 1006  
TR|A0A514DCE7|A0A514DCE7\_9VIRU RLPTGAHRS--DPIWRRWHQLGLQAPRQSLMVNYVHPLRERREIESLEDYSVLIEWEQ--N 993  
TR|A0A514D1M0|A0A514D1M0\_9VIRU RQIRETPL--T--AREAHRWWSAANELPHQSLMVNYLHPPFRERRAIEALSDYSVVLWEQD--N 576  
TR|A0A7S5WL3|A0A7S5WL3\_9VIRU HMPG--E--VD--PLVSRRWHSLSIESNESLMINYIHPLEKRQIESLHDYSIFIWEKD--N 945  
TR|A0A515KU39|A0A515KU39\_9VIRU HMQADS--TD--PLVSRRWHSLSIESPNESLMINYIHPLEKRQIESLHDYSIFIWEKD--N 1042  
TR|A0A7S5WLX7|A0A7S5WLX7\_9VIRU TMTD--H--GD--RQASRRWHGLSIGQGNNSLMINYVHPLKERREIEALQDYSIFIWEKD--N 932  
TR|A0A7S5WL4|A0A7S5WL4\_9VIRU TMTD--H--GD--RQASRRWHGLSIGQGNNSLMINYVHPLKERREIEALQDYSIFIWEKD--N 919  
TR|A0A0M4L069|A0A0M4L069\_9VIRU TMTD--H--GD--RQASRRWHGLSIGQGNNSLMINYVHPLKERREIEALQDYSIFIWEKD--N 917  
TR|A0A7S5WLW1|A0A7S5WLW1\_9VIRU TMTD--H--GD--RQASRRWHGLSIGQGNNSLMINYVHPLKERREIEALQDYSIFIWEKD--N 932

|    |            |                  |                                                               |      |
|----|------------|------------------|---------------------------------------------------------------|------|
| TR | A0A0A7DSJ8 | A0A0A7DSJ8_9VIRU | TTADDITALDRRYTAQLWFDAARQVPKRSLMVNYVSPFPDRREFSSLQDYSIIVWEKE-N  | 999  |
| TR | A0A2Z1Q370 | A0A2Z1Q370_9VIRU | RNNAQV---D-GETHRRWFDAARQEPHVSLMVNYIHP TKDSRQLDNLLDYSTIILEQG-N | 1056 |
| TR | E7BMX6     | E7BMX6_9VIRU     | TTADDVTTLDRRYTAQLWFDAARQVPKRSLMVNYVSPFPDRREFSSLQDYSIIVWEKE-N  | 998  |
| TR | A0A7L9R666 | A0A7L9R666_9VIRU | TSADDITALDRRYTAQLWFDAARQVPRRSLMVNYVSPFPDRREFSSLQDYSIIVWEKE-N  | 999  |
| TR | A0A346P9C1 | A0A346P9C1_9VIRU | RESQTAHNRMTAEQISRVHKLGCGLPHQSLMVNYINPYAIRSQVDQLADYSIVILSSG-A  | 1127 |
| TR | A0A2Z5WAE5 | A0A2Z5WAE5_9VIRU | RENTTPGNGMAPDHVRRTRYRASLGAPHQSLMVNYVAPDAVHQEVDPPADYSFLIVTRG-S | 1033 |
| TR | A0A2L1GG75 | A0A2L1GG75_9VIRU | RENTTPGNGMAPDHVRRTRYRASLGAPHQSLMVNYVAPDAVHQEVDPPADYSFLIVTRG-S | 1047 |
| TR | I1Y9U4     | I1Y9U4_9VIRU     | TVNPNVSALDRRFTSQLWFDAARQVPKRSLMINYVSPFPDRREFASLQDYSIIVWEKE-N  | 989  |
| TR | A0A1B4ZA68 | A0A1B4ZA68_9VIRU | QLQNNCSQAERNYLSQLWFDARQTPRRSLMINYVSPFPDRREFSTLQDYSIVVWEKG-N   | 1001 |
| TR | A0A2Z1Q3B3 | A0A2Z1Q3B3_9VIRU | QLANDCPQADRTYLSQLWFDARQTPRRSLMINYVSPFPDRREFSTLQDYSIVVWEKG-N   | 1006 |
| TR | D0TZ29     | D0TZ29_9VIRU     | TAKAGTSQADQNHLARLWFNTARQLPRSSSLAISYVSPYPERRELRTLQEYSIVVWENGQN | 1005 |
| TR | A0A7G3W8V4 | A0A7G3W8V4_9VIRU | TVNPDISALDRRFTSQLWFDAARQVAKRSLMINYVSPFPDRREFASLQDYSIIVWEKE-N  | 408  |
| TR | A0A2Z5WAD8 | A0A2Z5WAD8_9VIRU | RATAPST-----VLRDAWARQVLDKQTSVGISYIPPPGFKIDTSGDAELFNVIWFKN-N   | 1058 |

. . : . \* : :

|     |            |                                                                |                                                                    |      |
|-----|------------|----------------------------------------------------------------|--------------------------------------------------------------------|------|
| lc1 | ORF2       | RFAALTFSNLNE--LLTKDNFNPTNIEESQKPFQTRFDSAPHRFEQLRPRTRVT--NNRSSH | 1417                                                               |      |
| TR  | H6UNN1     | H6UNN1_9VIRU                                                   | KFAGLTFSNITK--DLQDSTFNPDYISQQGPLTLNFD SAPRPMQNQPTRVA--ARQTNR       | 1029 |
| TR  | H6UNM9     | H6UNM9_9VIRU                                                   | HFAGITFSNITR--QLSDAKFDP RSFVRDQTPFQLHFD SAPKAFEQNRSSRVL--RRTSRV    | 1038 |
| TR  | A0A7G4WLZ4 | A0A7G4WLZ4_9VIRU                                               | GFAGLTVMNNYE--SFSNPDLPLSRLLPDQSPFTVPFDSAPKPYMQNQPTRIT--SKPSTR      | 1063 |
| TR  | A0A1P8DF80 | A0A1P8DF80_9VIRU                                               | GFAGLTVMNNYE--SFSNPDLPLSRLLPDQSPFTVPFDSAPKPYMQNQPTRVT--SKPGTR      | 1063 |
| TR  | A0A514DCE7 | A0A514DCE7_9VIRU                                               | RFAGMSLIRYDMPNGSADTRFDPTGTVPLSK--AFDLP--GASAGPATTLNPNRVT--ARRVMG   | 1050 |
| TR  | A0A514D1M0 | A0A514D1M0_9VIRU                                               | MFAGLTFSNLFQ--EINKGDARFDTIRPQQSMFQLSSYAKPRTSEFFFNTRIS--SSQRYG      | 633  |
| TR  | A0A7S5WL3  | A0A7S5WL3_9VIRU                                                | RYVGMTSVRYDMPDVAAGARFDPKGIPAMP--NYDIP--TMAGDEYRSVQPGRIA--KNKRKT    | 1002 |
| TR  | A0A515KU39 | A0A515KU39_9VIRU                                               | RYVGMTSVRYDMPDVAAGARFDPAGIPAMP--NYDIP--TMAGDEYRSVQPGRVA--KNKRKN    | 1099 |
| TR  | A0A7S5WLX7 | A0A7S5WLX7_9VIRU                                               | KYTGMTAVRYDLPDVAAGARFDPKGV PAMP--NYDIP--AATGDEYMSVQPARIT--KNRKD--  | 988  |
| TR  | A0A7S5WL4  | A0A7S5WL4_9VIRU                                                | KYTGMTAVRYDLPDVAAGARFDPKGV PAMP--NYDIP--AATGDEYMSVQPARIT--KNRKE--  | 975  |
| TR  | A0A0M4L069 | A0A0M4L069_9VIRU                                               | KYTGMTAVRYDLPDVAAGARFDPKGV PAMP--NYDIP--AATGDEYMSVQPARIT--KNRKE--  | 973  |
| TR  | A0A7S5WLW1 | A0A7S5WLW1_9VIRU                                               | KYTGMTAVRYDLPDVAAGARFDPKGV PAMP--NYDIP--AATGDEYMSVQPARIT--KNRKE--  | 988  |
| TR  | A0A0A7DSJ8 | A0A0A7DSJ8_9VIRU                                               | AYAGMSLVPVDFSPVSI--ADYKPAANLTFP--SLTRP--SAVDTS DI--AKNPRVA--SSKRAP | 1054 |
| TR  | A0A2Z1Q370 | A0A2Z1Q370_9VIRU                                               | NYTGMVVVPHHLPDYEIDSELNPARLLDFG--GRGEA--PPSAEPVALDKPTNLRVA-----     | 1109 |
| TR  | E7BMX6     | E7BMX6_9VIRU                                                   | AYAGMSLVPVDFSPVSI--ADYKPAANLTFP--SLTRP--SAVDTS DI--AKNPRVA--SSKRAP | 1053 |
| TR  | A0A7L9R666 | A0A7L9R666_9VIRU                                               | AYAGMSLVPVDFSPVSI--ADYKPAASLTFP--SLTRP--SAVDTS DI--AKNPRVA--SSKRAP | 1054 |
| TR  | A0A346P9C1 | A0A346P9C1_9VIRU                                               | KFAGMALQPGHFTAVTADDRNLRE--RPQQSTFTHA--AADPSRGRDLAPVRIA--ARVA--     | 1181 |
| TR  | A0A2Z5WAE5 | A0A2Z5WAE5_9VIRU                                               | SYAGMILQQHNAEIIIPAGTRIQPD--RPTQTPFTQA--YDIGLNPVAHAPVRIT--NSVR--    | 1087 |
| TR  | A0A2L1GG75 | A0A2L1GG75_9VIRU                                               | SYAGMILQQHNAEIIIPAGTRIQPD--RPTQTPFTQA--YDIGLNPVAHAPVRIT--NSVR--    | 1101 |
| TR  | I1Y9U4     | I1Y9U4_9VIRU                                                   | AYAGMSLVPVDFSPVSM--ADYKPASNLTFP--SLTRP--SAVDVSDV--ARNPRVA--SSKRAP  | 1044 |
| TR  | A0A1B4ZA68 | A0A1B4ZA68_9VIRU                                               | TYAGMSLVPVDFAPTSI--ADYHPNPQLPMP--NVTRP--SAADVSDV--TKGRVARVRNTRKP   | 1057 |
| TR  | A0A2Z1Q3B3 | A0A2Z1Q3B3_9VIRU                                               | TYAGMSLIPVDFAPTSI--ADYHPNPQLPMP--NVTRP--SAADVSDV--TKGRVARVRNTHKP   | 1062 |
| TR  | D0TZ29     | D0TZ29_9VIRU                                                   | AFSGMSLMPANF SVQHM--DAFLPSKDLKLP--AFSRP--VAADISDS--SKSARVT--RSTPQP | 1060 |
| TR  | A0A7G3W8V4 | A0A7G3W8V4_9VIRU                                               | AYAGMSLVPVDFSPVSM--ADYKPASNLTFP--SLTRP--SAVDTS DI--AKNPRVA--SSKRAP | 463  |
| TR  | A0A2Z5WAD8 | A0A2Z5WAD8_9VIRU                                               | SYAGMTLEQVEPGQPLIGSSSLPLPEGPHSLPLTHL--ANDNYDMPKGGKRVW--AGRSQP      | 1115 |

: . :

|     |            |                                     |                                                             |      |
|-----|------------|-------------------------------------|-------------------------------------------------------------|------|
| lc1 | ORF2       | A--KEA-R-PA-----LSSATDIN-----R-RIAE | 1437                                                        |      |
| TR  | H6UNN1     | H6UNN1_9VIRU                        | -----P-----PVDVTNIN-----R-----                              | 1039 |
| TR  | H6UNM9     | H6UNM9_9VIRU                        | V--NRGAD-LA-----ASINNRLA-----H-----                         | 1055 |
| TR  | A0A7G4WLZ4 | A0A7G4WLZ4_9VIRU                    | T--TTDQH-VEPLSSGT-----PISVADAFN-----                        | 1086 |
| TR  | A0A1P8DF80 | A0A1P8DF80_9VIRU                    | Q--TADQD-TKPLGSNT-----SVSVADAFN-----                        | 1086 |
| TR  | A0A514DCE7 | A0A514DCE7_9VIRU                    | R--D--PNLMG-----RVQA-----VMRPRG                             | 1067 |
| TR  | A0A514D1M0 | A0A514D1M0_9VIRU                    | R--INSRR-VNKQAGGAYETPATHLKFGSISDEVK-----ERVAAI              | 671  |
| TR  | A0A7S5WL3  | A0A7S5WL3_9VIRU                     | G--G--KSSEEK--S-----DEENPRVKV-----TRFLEH                    | 1026 |
| TR  | A0A515KU39 | A0A515KU39_9VIRU                    | A--K--QQNEDNVDK-----EETNPRVKV-----TRYLEH                    | 1125 |
| TR  | A0A7S5WLX7 | A0A7S5WLX7_9VIRU                    | -----VDAPPRTKV-----TKYLEM                                   | 1003 |
| TR  | A0A7S5WL4  | A0A7S5WL4_9VIRU                     | -----VDAPPRTKV-----TKYLEQ                                   | 990  |
| TR  | A0A0M4L069 | A0A0M4L069_9VIRU                    | -----VDAPPRTKV-----TKYLET                                   | 988  |
| TR  | A0A7S5WLW1 | A0A7S5WLW1_9VIRU                    | -----VDAPPRTKV-----TKYLEM                                   | 1003 |
| TR  | A0A0A7DSJ8 | A0A0A7DSJ8_9VIRU                    | R--AAASDILARLKE-----FNSPPPPP-----PSPEPK                     | 1081 |
| TR  | A0A2Z1Q370 | A0A2Z1Q370_9VIRU                    | A--ARTGAPVARFHS-----RPRPPPVN-----RSSDPD                     | 1136 |
| TR  | E7BMX6     | E7BMX6_9VIRU                        | R--AAASDILSRLKE-----FNSPAPTP-----PSPGLS                     | 1080 |
| TR  | A0A7L9R666 | A0A7L9R666_9VIRU                    | R--AAASDILARLKE-----FNSPPPPP-----PSPGLS                     | 1081 |
| TR  | A0A346P9C1 | A0A346P9C1_9VIRU                    | -----P-----N-----TSL-----                                   | 1186 |
| TR  | A0A2Z5WAE5 | A0A2Z5WAE5_9VIRU                    | -----P-----R-----QSLTGE                                     | 1095 |
| TR  | A0A2L1GG75 | A0A2L1GG75_9VIRU                    | -----S-----R-----QSPTGE                                     | 1109 |
| TR  | I1Y9U4     | I1Y9U4_9VIRU                        | R--AAASDILNRFKE-----FNTPPSPE-----PAPTQH                     | 1071 |
| TR  | A0A1B4ZA68 | A0A1B4ZA68_9VIRU                    | R--VASNVVADRLRE-----FQSEREHT-----                           | 1078 |
| TR  | A0A2Z1Q3B3 | A0A2Z1Q3B3_9VIRU                    | R--VRSNVVVDRLRE-----YHQELSEP-----                           | 1083 |
| TR  | D0TZ29     | D0TZ29_9VIRU                        | R--ARAANVLEKINA-----FRRADPVN-----RSPDPD                     | 1087 |
| TR  | A0A7G3W8V4 | A0A7G3W8V4_9VIRU                    | R--AAASDILNRFKE-----FNAPPPST-----PAPSHH                     | 490  |
| TR  | A0A2Z5WAD8 | A0A2Z5WAD8_9VIRU                    | SPADVADEPADNFPL-----RSALGDPFSRPRTEEDVLYYKAAASAPQSSARPHRPVPG | 1170 |

|     |      |                                             |      |
|-----|------|---------------------------------------------|------|
| lc1 | ORF2 | -----LRRPQAGNITYETKYPLHADDLPKMNSYDVNVT--KDG | 1473 |
|-----|------|---------------------------------------------|------|

|    |            |                  |                                                              |      |
|----|------------|------------------|--------------------------------------------------------------|------|
| TR | H6UNN1     | H6UNN1_9VIRU     | -----RIAETGKITYKSKYPHFDELPPMESTPVEVT-EEG                     | 1074 |
| TR | H6UNM9     | H6UNM9_9VIRU     | -----RVKQSGLIEYQSKNPSFEDELPPMRSKVATAN-SNG                    | 1090 |
| TR | A0A7G4WLZ4 | A0A7G4WLZ4_9VIRU | -----KRIAATGSISYETKYPLFEDELPSFKTAEVSSD-QSG                   | 1122 |
| TR | A0A1P8DF80 | A0A1P8DF80_9VIRU | -----KRIAATGSISYETKYPLFEDELPSFKTAEVSSD-QAG                   | 1122 |
| TR | A0A514DCE7 | A0A514DCE7_9VIRU | -----AVVNSPPIIEYRAKHPLTTDDVPRMDTYNAEMD-ERG                   | 1103 |
| TR | A0A514D1M0 | A0A514D1M0_9VIRU | -----ARGDQAGAITYTTKYPHTTDELPTLEDGVVEYD-AHA                   | 707  |
| TR | A0A7S5WL3  | A0A7S5WL3_9VIRU  | -----GDLDRDATLTYKAKYPVNIDEVPALPANQVHMT-DTN                   | 1062 |
| TR | A0A515KU39 | A0A515KU39_9VIRU | -----GDLDRDATLTYKAKYPVNIDQVPTLPENQVHMT-DTN                   | 1161 |
| TR | A0A7S5WLX7 | A0A7S5WLX7_9VIRU | -----GELERTGELKYNPIYPTNSDQVPKLPDAHVVMD-DKN                   | 1039 |
| TR | A0A7S5WL4  | A0A7S5WL4_9VIRU  | -----GELDRGTGELKYNPSYPTNLEQVPKIPDAHVVMD-DRN                  | 1026 |
| TR | A0A0M4L069 | A0A0M4L069_9VIRU | -----GELERTGELKYNPIYPTNSDQVPKIPDAHVIMD-DKN                   | 1024 |
| TR | A0A7S5WLW1 | A0A7S5WLW1_9VIRU | -----GELERTGELKYNPVYPTNSDQVPKLPDAHVVMD-DKN                   | 1039 |
| TR | A0A0A7DSJ8 | A0A0A7DSJ8_9VIRU | -----HREPAAEALSIEAKYPIEEAQVPSDFRFYQPVVEEDR                   | 1117 |
| TR | A0A2Z1Q370 | A0A2Z1Q370_9VIRU | -----LTQGGALDISYSPNPNELVSDLPITLGRYEAQVT-DDG                  | 1172 |
| TR | E7BMX6     | E7BMX6_9VIRU     | -----QREPAQALSIEAKYPVEESQVPADFRFYQPVVEEDR                    | 1116 |
| TR | A0A7L9R666 | A0A7L9R666_9VIRU | -----QREPAQALSIEAKYPVEEAQVPADFRFYQPVVEEDR                    | 1117 |
| TR | A0A346P9C1 | A0A346P9C1_9VIRU | -----KTGQPAGKVHFQSKYPVWRDDIPRIPRIDVEVT-PQD                   | 1222 |
| TR | A0A2Z5WAE5 | A0A2Z5WAE5_9VIRU | -----KRVQLQGNLRYEPKYPVWRDQVPDLQSYQVHAE-AGQ                   | 1131 |
| TR | A0A2L1GG75 | A0A2L1GG75_9VIRU | -----RRVQLQGNLRYEPKYPVWRDQVPDLQSYQVHAE-AGQ                   | 1145 |
| TR | I1Y9U4     | I1Y9U4_9VIRU     | -----VNDTPAAQALSIEAKYPVEEAQVPADFKYQPVVAEDR                   | 1108 |
| TR | A0A1B4ZA68 | A0A1B4ZA68_9VIRU | -----EPKVSAGALSIESKYPVEQSELPPMQNYTAHVN-GPE                   | 1113 |
| TR | A0A2Z1Q3B3 | A0A2Z1Q3B3_9VIRU | -----EQRISGALSIEPKYPVEQSEVPPMQNYTAHVN-GPE                    | 1118 |
| TR | D0TZ29     | D0TZ29_9VIRU     | -----GIEGVTASLSHEAKYPVEMSQLPNNMNFSTKVEDGR                    | 1124 |
| TR | A0A7G3W8V4 | A0A7G3W8V4_9VIRU | -----ADEPPAARLSIESKYPVEEAQVPDGFYQPVVEDDR                     | 527  |
| TR | A0A2Z5WAD8 | A0A2Z5WAD8_9VIRU | VDGDSTLRGPRKLSDFEPQPHTGSRDYAHGPGQYAQKNPLNLRVVKARVSGAAPRG---- | 1226 |

. \* ::

|     |            |                                     |                                                             |      |
|-----|------------|-------------------------------------|-------------------------------------------------------------|------|
| 1c1 | ORF2       | FEYPQNMAPNDL-SFTPAD-----RLKKIQ----- | 1497                                                        |      |
| TR  | H6UNN1     | H6UNN1_9VIRU                        | IVVDPRQRPM-E-GDTPSS-----RLAEIN-----                         | 1097 |
| TR  | H6UNM9     | H6UNM9_9VIRU                        | IMIEENDGQP-V---DNSA-----RLAYVN-----                         | 1111 |
| TR  | A0A7G4WLZ4 | A0A7G4WLZ4_9VIRU                    | LHFTTTP---LG-GRTPKG-----RLERIR-----                         | 1143 |
| TR  | A0A1P8DF80 | A0A1P8DF80_9VIRU                    | LHFTTTP---LG-GRTPKG-----RLERIR-----                         | 1143 |
| TR  | A0A514DCE7 | A0A514DCE7_9VIRU                    | ITVGQEFIRP---GDMPTK-----RYE---PPLADG-----VQD                | 1131 |
| TR  | A0A514D1M0 | A0A514D1M0_9VIRU                    | ISALPAERPD-----ATLA-----KLARIQ-----                         | 728  |
| TR  | A0A7S5WL3  | A0A7S5WL3_9VIRU                     | IIYDPVPLAE---ARTPLD-----RLA---L-IDAK-----LSE                | 1089 |
| TR  | A0A515KU39 | A0A515KU39_9VIRU                    | IIYDPVPLAE---ARTPLD-----RLA---L-IDAK-----LNE                | 1188 |
| TR  | A0A7S5WLX7 | A0A7S5WLX7_9VIRU                    | IVFDPAPLAE---SRTPAE-----RLA---Y-LNEK-----LRE                | 1066 |
| TR  | A0A7S5WL4  | A0A7S5WL4_9VIRU                     | IVFDPTPLAE---SRTPAE-----RLA---Y-LNEK-----LRE                | 1053 |
| TR  | A0A0M4L069 | A0A0M4L069_9VIRU                    | IIFDPAPLAE---SRTPAE-----RLA---Y-LNEK-----LRE                | 1051 |
| TR  | A0A7S5WLW1 | A0A7S5WLW1_9VIRU                    | IVFDPAPLAE---SRTPAE-----RLA---Y-LNEK-----LRE                | 1066 |
| TR  | A0A0A7DSJ8 | A0A0A7DSJ8_9VIRU                    | VHVEPADAPD---AYDRLS-----KQQLKLAIEENN-----MQL                | 1147 |
| TR  | A0A2Z1Q370 | A0A2Z1Q370_9VIRU                    | IQIPQRPSAK---CEPSEYMAGAN-----S-----GYDAQLEADRN-----REL      | 1208 |
| TR  | E7BMX6     | E7BMX6_9VIRU                        | VHVEPADAPD---AYDRLS-----KQQLKLAIEENN-----MQL                | 1146 |
| TR  | A0A7L9R666 | A0A7L9R666_9VIRU                    | VHVEPADAPD---AYDRLS-----KQQLKLAIEENN-----MQL                | 1147 |
| TR  | A0A346P9C1 | A0A346P9C1_9VIRU                    | IEVTAVDLPPEEPPQTVDDEGG---DGLTGHYTTDADDTPTPVRSN---FMTDEEIALR | 1276 |
| TR  | A0A2Z5WAE5 | A0A2Z5WAE5_9VIRU                    | VTVDEHPVKPRSPKRTLPAPAETVYPDSSTSSVYESADDEPAPRGQPHHGLSDIEVDQL | 1191 |
| TR  | A0A2L1GG75 | A0A2L1GG75_9VIRU                    | VTVDEHPVKPRSPKRTLPAPAETVYPDSSTSSVYESADEEPIPRRQSHHGLSDVEVDQL | 1205 |
| TR  | I1Y9U4     | I1Y9U4_9VIRU                        | VYVEPADAPD---AYDRLS-----KQQLKLAIEENN-----MQL                | 1138 |
| TR  | A0A1B4ZA68 | A0A1B4ZA68_9VIRU                    | VTLRD-SDTG---AFTRLQ-----KREMLQALQSN-----MEL                 | 1142 |
| TR  | A0A2Z1Q3B3 | A0A2Z1Q3B3_9VIRU                    | VSITD-ADTG---AFTRLQ-----KREMLQALQTN-----MAL                 | 1147 |
| TR  | D0TZ29     | D0TZ29_9VIRU                        | ISVETSPSHE---ASLAAL-----RDELKRSAAAN-----AAL                 | 1154 |
| TR  | A0A7G3W8V4 | A0A7G3W8V4_9VIRU                    | VHVEPADAPD---AYDRLS-----KQQLKLAIEENN-----MQL                | 557  |
| TR  | A0A2Z5WAD8 | A0A2Z5WAD8_9VIRU                    | -----SRPPRAAA-----D-----ALTAPP-----                         | 1241 |

|     |            |                                                    |                                                         |      |
|-----|------------|----------------------------------------------------|---------------------------------------------------------|------|
| 1c1 | ORF2       | -----E-----A---QAHLDDQFQYFAEQQQQQAI-NRT---R---L--- | 1525                                                    |      |
| TR  | H6UNN1     | H6UNN1_9VIRU                                       | -----A-----A---QQMINRMIEQYMSSEERTKAABV-RAA---A---A---   | 1125 |
| TR  | H6UNM9     | H6UNM9_9VIRU                                       | -----E-----M-----QARLDQARDELGTGNWQQEAAAM-RAA---A---R--- | 1139 |
| TR  | A0A7G4WLZ4 | A0A7G4WLZ4_9VIRU                                   | -----E-----L---ELARDAEYEEYVRESQLKEAS-ARA---E---A---     | 1171 |
| TR  | A0A1P8DF80 | A0A1P8DF80_9VIRU                                   | -----E-----L---ELARDAEYEEYVRESQLKEAS-ARA---E---A---     | 1171 |
| TR  | A0A514DCE7 | A0A514DCE7_9VIRU                                   | TSHLHR-----QLQQKEYEMDQAHQAWLAAEQIKAAK-SRA---AYAD---     | 1170 |
| TR  | A0A514D1M0 | A0A514D1M0_9VIRU                                   | -----N-----Y---EAEQDALFQQMLAERSARIAI-PRP-----           | 754  |
| TR  | A0A7S5WL3  | A0A7S5WL3_9VIRU                                    | VDGFEE-----QLQNERAELHRIE-----E-ARQ---QQID---            | 1117 |
| TR  | A0A515KU39 | A0A515KU39_9VIRU                                   | ADDFEE-----QLHREAEELCRIRD-----E-ARQ---QQID---           | 1216 |
| TR  | A0A7S5WLX7 | A0A7S5WLX7_9VIRU                                   | TDDFQL-----ELEAERSKLQQLRD-----E-ARQ---HQAD---           | 1094 |
| TR  | A0A7S5WL4  | A0A7S5WL4_9VIRU                                    | TDDFQL-----ELEAERSKLQQLRD-----E-ARQ---HQAD---           | 1081 |
| TR  | A0A0M4L069 | A0A0M4L069_9VIRU                                   | TDDFQL-----ELEAERSKLQQLRD-----E-ARQ---HQAD---           | 1079 |
| TR  | A0A7S5WLW1 | A0A7S5WLW1_9VIRU                                   | TDDFQL-----ELEAERSKLQQLRD-----E-ARQ---HQAD---           | 1094 |
| TR  | A0A0A7DSJ8 | A0A0A7DSJ8_9VIRU                                   | LAKIQN-----SPILGELDLDAERKR-REDFQ-KVES---A---RNER---     | 1182 |
| TR  | A0A2Z1Q370 | A0A2Z1Q370_9VIRU                                   | DEQFRE-----FLRQSTNQLNEFRQ-----                          | 1228 |
| TR  | E7BMX6     | E7BMX6_9VIRU                                       | LAKIQN-----SPILGELDLDAERKR-REDFQ-KVES---A---RNER---     | 1181 |
| TR  | A0A7L9R666 | A0A7L9R666_9VIRU                                   | LAKIQN-----SPILGELDLDAERRR-REDFQ-KAES---M---RNER---     | 1182 |

|    |            |                  |                                                              |      |
|----|------------|------------------|--------------------------------------------------------------|------|
| TR | A0A346P9C1 | A0A346P9C1_9VIRU | LKKADSQGMVNSRALDFYRTQAMEEVSGKIDAEFNELLAE-----LNARAALKQQELQS  | 1330 |
| TR | A0A2Z5WAE5 | A0A2Z5WAE5_9VIRU | LERIERDYAGNGHNINA----AQDARDRAVDDDFDQYLKSSRDQRKLNARIAAARKAVQ- | 1246 |
| TR | A0A2L1GG75 | A0A2L1GG75_9VIRU | LERIESDYAGNGHNUNA---SQDARDRVVDYDFEYLFKFSRDQRKLNARIAAARKAVQ-  | 1260 |
| TR | I1Y9U4     | I1Y9U4_9VIRU     | LAKIQN-----SPILGELDLDAERKR-QDEFR-QLEA---A---RNAR--           | 1173 |
| TR | A0A1B4ZA68 | A0A1B4ZA68_9VIRU | MAKLQA-----SPLLASPDREDLVQD-SAARR-AAEY---A---QQVR--           | 1177 |
| TR | A0A2Z1Q3B3 | A0A2Z1Q3B3_9VIRU | MAKLQA-----SPLLASPDSEELVQD-SAARR-ASYE---A---QQNR--           | 1182 |
| TR | D0TZ29     | D0TZ29_9VIRU     | LERIER-----SQLVPDFSLEHMRTQ-RPVEAVASYP---N---R-----           | 1187 |
| TR | A0A7G3W8V4 | A0A7G3W8V4_9VIRU | LAKIQN-----SPILGELDLDAERKR-QEEFR-QLEA---A---RNAR--           | 592  |
| TR | A0A2Z5WAD8 | A0A2Z5WAD8_9VIRU | -----ARREIDRINAIEWSNLRAKYDIDAARDLPTEH-P--                    | 1273 |

|     |            |                  |                                                         |      |
|-----|------------|------------------|---------------------------------------------------------|------|
| 1c1 | ORF2       |                  | ---QANRVA-----SPA-----TTRPI-APVPR-RKARL---PSV--INYP     | 1557 |
| TR  | H6UNN1     | H6UNN1_9VIRU     | ---RQPRTQ-----SPP-----LWLPS-PKKP--RVA-----PK            | 1148 |
| TR  | H6UNM9     | H6UNM9_9VIRU     | ---RAPAHE-----HTKSS-----LYIPA-TGTA--RKARA-EKRRSVSEAVVPT | 1177 |
| TR  | A0A7G4WLZ4 | A0A7G4WLZ4_9VIRU | ---NARKAA-----TPA-----YHTIV-TKRPPKTKGGASAVANSLSHMNFQR   | 1210 |
| TR  | A0A1P8DF80 | A0A1P8DF80_9VIRU | ---NARKAA-----TPA-----YHTIV-TKRPPKTKGGASAVANSLSHMNFQR   | 1210 |
| TR  | A0A514DCE7 | A0A514DCE7_9VIRU | ---LQARQAERV-----ARGRS-----LPP--RPKAPSVQRPQSKR-----     | 1201 |
| TR  | A0A514D1M0 | A0A514D1M0_9VIRU | -----VPQ-----SWRPG-PPRQRAQVR-----P---SSWPR              | 777  |
| TR  | A0A7S5WL3  | A0A7S5WL3_9VIRU  | ---IAKRVAANT---KRHSEQRR-----RFT-----                    | 1137 |
| TR  | A0A515KU39 | A0A515KU39_9VIRU | ---IAKRVAASS---RKHSEGRR-----RFT-----                    | 1236 |
| TR  | A0A7S5WLX7 | A0A7S5WLX7_9VIRU | ---IIARVAQNT---RKHNEARR-----RFT-----                    | 1114 |
| TR  | A0A7S5WL3  | A0A7S5WL3_9VIRU  | ---IIARVAKNA---RKHNEARR-----RFT-----                    | 1101 |
| TR  | A0A0M4L069 | A0A0M4L069_9VIRU | ---IIARVAQNT---RKHNEARR-----RFT-----                    | 1099 |
| TR  | A0A7S5WLW1 | A0A7S5WLW1_9VIRU | ---IIARVAQNT---RKHNEARR-----RFT-----                    | 1114 |
| TR  | A0A0A7DSJ8 | A0A0A7DSJ8_9VIRU | ---IQRRAS-----FVPFGPTRPRP---VLTP-----                   | 1203 |
| TR  | A0A2Z1Q370 | A0A2Z1Q370_9VIRU | ---ARVARTT---PPQRQSS-----SWVPR-SPGPRPIRHHSTESQ-----     | 1262 |
| TR  | E7BMX6     | E7BMX6_9VIRU     | ---IQRRSS-----FVPFGPTRPRP---VLTP-----                   | 1202 |
| TR  | A0A7L9R666 | A0A7L9R666_9VIRU | ---IQRRSS-----FVPFGPTRPRP---VLTP-----                   | 1203 |
| TR  | A0A346P9C1 | A0A346P9C1_9VIRU | YQGLRKRVAHVQRTNTLPHRRSFSVNNVKSATAIRPPRQSPRQSKSVA-----   | 1378 |
| TR  | A0A2Z5WAE5 | A0A2Z5WAE5_9VIRU | --DEVKKL-----EQTRQT-KRGTS---TQRTPSPRRQPHAP-----         | 1278 |
| TR  | A0A2L1GG75 | A0A2L1GG75_9VIRU | --GEVKKL-----DQGRQT-KRGTS---TQSAPSPRRQPHAP-----         | 1292 |
| TR  | I1Y9U4     | I1Y9U4_9VIRU     | ---IQRRSS-----YVPFGPTRPRP---VLSP-----                   | 1194 |
| TR  | A0A1B4ZA68 | A0A1B4ZA68_9VIRU | ---IADRVAKAK---VPTSPKPR-----VKLPPTAPTQP---PVRAL-----    | 1212 |
| TR  | A0A2Z1Q3B3 | A0A2Z1Q3B3_9VIRU | ---IAQRLAQAK---ATTSPKPR-----VKLPPPPARPAH---SPPTS-----   | 1217 |
| TR  | D0TZ29     | D0TZ29_9VIRU     | -----GL---TRSPRPQ-----RHTPRSPRPEGNRNLRLPASP-----S       | 1220 |
| TR  | A0A7G3W8V4 | A0A7G3W8V4_9VIRU | ---IQRRAS-----YVPFGPARPRP---VLSP-----                   | 613  |
| TR  | A0A2Z5WAD8 | A0A2Z5WAD8_9VIRU | ---ARNRMV-----YLEHRFKN---LTEMAT---PGTPKPQLEKA-----      | 1305 |

|     |            |                  |                                                              |      |
|-----|------------|------------------|--------------------------------------------------------------|------|
| 1c1 | ORF2       |                  | ---PE-----PASYPH-----KGRQSYV                                 | 1571 |
| TR  | H6UNN1     | H6UNN1_9VIRU     | ---PR-----PTSMPII                                            | 1157 |
| TR  | H6UNM9     | H6UNM9_9VIRU     | ---SR-----QVTGAFN                                            | 1186 |
| TR  | A0A7G4WLZ4 | A0A7G4WLZ4_9VIRU | DRAPLPSSISVNTKGYKPKVNLPPPPQGYQWTTTPTNTHPPVFSEKPNPLSSVKDARSVR | 1270 |
| TR  | A0A1P8DF80 | A0A1P8DF80_9VIRU | DRAPLPSSISVSTKGYKPKINLPPPPQGYQWTTTPTNTHPPVFSEEPNPLSSVKSARSVR | 1270 |
| TR  | A0A514DCE7 | A0A514DCE7_9VIRU | --NSDPPKT-RV-----PGGDK--V-----TTAF---EAHIPGH                 | 1227 |
| TR  | A0A514D1M0 | A0A514D1M0_9VIRU | SQRAV-----VTAQSGTIDKLADGQ---                                 | 797  |
| TR  | A0A7S5WL3  | A0A7S5WL3_9VIRU  | --NPNQATY-LN-----PGMKK--A-----APAF---SNIPEH-                 | 1162 |
| TR  | A0A515KU39 | A0A515KU39_9VIRU | --NPDQATY-LN-----PGMRK--A-----APAY---SNIPVQ-                 | 1261 |
| TR  | A0A7S5WLX7 | A0A7S5WLX7_9VIRU | --NPNQATY-LN-----PGMKK--A-----APAA---STIDKH-                 | 1139 |
| TR  | A0A7S5WL3  | A0A7S5WL3_9VIRU  | --NPNQATY-LN-----PGMKK--A-----APAV---SSISER-                 | 1126 |
| TR  | A0A0M4L069 | A0A0M4L069_9VIRU | --NPNQATY-LN-----PGMKK--A-----APAL---STIDKH-                 | 1124 |
| TR  | A0A7S5WLW1 | A0A7S5WLW1_9VIRU | --NPNQATY-LN-----PGMKK--A-----APAA---STIDKH-                 | 1139 |
| TR  | A0A0A7DSJ8 | A0A0A7DSJ8_9VIRU | -----R-----APAV---KRPQVHG                                    | 1215 |
| TR  | A0A2Z1Q370 | A0A2Z1Q370_9VIRU | -----VVRN-----RRSKMPQ-----HRPVYG                             | 1279 |
| TR  | E7BMX6     | E7BMX6_9VIRU     | -----R-----APAA---KRPQVHG                                    | 1214 |
| TR  | A0A7L9R666 | A0A7L9R666_9VIRU | -----R-----APTV---KRPQVHG                                    | 1215 |
| TR  | A0A346P9C1 | A0A346P9C1_9VIRU | -----FSAQASGLDVGTAKAEFND-----AAAAVTQN-NAQ-----IQAA           | 1411 |
| TR  | A0A2Z5WAE5 | A0A2Z5WAE5_9VIRU | -----FSSHSGGLAPPTRTDVPV-----EQPRAELPPAK-----HDVA             | 1312 |
| TR  | A0A2L1GG75 | A0A2L1GG75_9VIRU | -----FSTHSGGLAPPTRKDVVPV-----EQPRTTELPPAK-----HDVA           | 1326 |
| TR  | I1Y9U4     | I1Y9U4_9VIRU     | -----R-----STPN---KPPLVHG                                    | 1206 |
| TR  | A0A1B4ZA68 | A0A1B4ZA68_9VIRU | -----S-----PIPE---HTVQVVG                                    | 1224 |
| TR  | A0A2Z1Q3B3 | A0A2Z1Q3B3_9VIRU | -----P-----AQPV---KTVQVVG                                    | 1229 |
| TR  | D0TZ29     | D0TZ29_9VIRU     | --QPQAACHLLF-----PVAQVPTPD-----PNAH---FGVPLRA                | 1250 |
| TR  | A0A7G3W8V4 | A0A7G3W8V4_9VIRU | -----R-----SAPS---KPPLVHG                                    | 625  |
| TR  | A0A2Z5WAD8 | A0A2Z5WAD8_9VIRU | -----VGENAAR-----PTAA-----GEFV                               | 1320 |

|     |            |                  |                                                             |      |
|-----|------------|------------------|-------------------------------------------------------------|------|
| 1c1 | ORF2       |                  | ANKPLPPQPKPLV--PNDAPAAGA-QQAAIDLATLN-----ARRGSLRP-----AVHT  | 1616 |
| TR  | H6UNN1     | H6UNN1_9VIRU     | ATKRLAPSEEPPII--PNDAAAVEA-QQRAMQLRDAV-----LSQK-ARP-----ATPT | 1201 |
| TR  | H6UNM9     | H6UNM9_9VIRU     | YSGPLQDTTEPVV--PNDAAAVET-QESARQNADHL-----FMGTG-ALP-----ARQT | 1230 |
| TR  | A0A7G4WLZ4 | A0A7G4WLZ4_9VIRU | FSGDAKAFPENVE--PNDASAAVV-QERADFLSTAS-----PVGLNRRNP-----AAII | 1315 |
| TR  | A0A1P8DF80 | A0A1P8DF80_9VIRU | FSGDAKAFPENVE--PNDASAAVV-QERADFLSTAS-----PVGLNRRNP-----ATII | 1315 |

|    |            |                  |                                                        |                                 |      |      |
|----|------------|------------------|--------------------------------------------------------|---------------------------------|------|------|
| TR | A0A514DCE7 | A0A514DCE7_9VIRU | ----QRLPAGPVA--PNDAPAGEA-QASLQQQQENL----               | QRFID---N-----                  | QSRL | 1266 |
| TR | A0A514D1M0 | A0A514D1M0_9VIRU | -SSQSTSKRKVVQ--FNDEAASAA-QDEALALKEIM----               | ESVSNRMPP-----                  | AAVI | 842  |
| TR | A0A7S5WL3  | A0A7S5WL3_9VIRU  | -----VEAV--PNDNSNGQA-QAGVGRMEQAF----                   | AGQYD---M-----                  | ADEI | 1196 |
| TR | A0A515KU39 | A0A515KU39_9VIRU | -----VEAV--PNDANSNGQA-QSGVGNMEKAF----                  | SGQYD---M-----                  | ADEI | 1295 |
| TR | A0A7S5WLX7 | A0A7S5WLX7_9VIRU | -----IVTV--PNDANSNGQM-QAGVGALDQAF----                  | TGQFT---M-----                  | ADEL | 1173 |
| TR | A0A7S5WL4  | A0A7S5WL4_9VIRU  | -----VTTV--PNDANSNGQM-QAGVGSLDQAF----                  | TGQFS---M-----                  | ADEL | 1160 |
| TR | A0A0M4L069 | A0A0M4L069_9VIRU | -----VTTV--PNDANSNGQM-QAGVGALDQAF----                  | TGQFT---M-----                  | ADEL | 1158 |
| TR | A0A7S5WLW1 | A0A7S5WLW1_9VIRU | -----VVTV--PNDANSNGQM-QAGVGALDQAF----                  | TGQFT---M-----                  | ADEL | 1173 |
| TR | A0A0A7DSJ8 | A0A0A7DSJ8_9VIRU | KLPPTEL RHAPVE--INDAAAEQV-QRQISQLGRPA----              | SPRS-----                       |      | 1252 |
| TR | A0A2Z1Q370 | A0A2Z1Q370_9VIRU | T-FPTPPPSEPVV--SNDVDARHT-QSMWLKHGDYN----               | TPNPL---A-----                  | SDAI | 1321 |
| TR | E7BMX6     | E7BMX6_9VIRU     | KLPPSEVKHAPVE--INDAAAEQV-QRQIPQLGRPV----               | SPRT-----                       |      | 1251 |
| TR | A0A7L9R666 | A0A7L9R666_9VIRU | KLPPSTELKHAPVE--INDAAAEQV-QRQIPQLGRPV----              | SPRS-----                       |      | 1252 |
| TR | A0A346P9C1 | A0A346P9C1_9VIRU | A-IKTHFSRPPV--KLPPSPPTLE-EIKANARENGFGLSTPKTDPQAFM----- | SGAV                            |      | 1460 |
| TR | A0A2Z5WAE5 | A0A2Z5WAE5_9VIRU | KLSPRPIRRPEPVV--TNDSSAAHA-Q----                        | AELQSINRALFENPPDAFPRTVRFVDVKDQI |      | 1365 |
| TR | A0A2L1GG75 | A0A2L1GG75_9VIRU | KLSPRPIRRPEPVV--TNDSSAAHA-Q----                        | AELQSINKALFENPPDAFPRTVRFDTKDQI  |      | 1379 |
| TR | I1Y9U4     | I1Y9U4_9VIRU     | KLSENMKHAPVE--VNDAAAEV-QREVRSGLGRPV----                | PPLT-----                       |      | 1243 |
| TR | A0A1B4ZA68 | A0A1B4ZA68_9VIRU | KLNEEILNHSPVE--VNDAAAPQV-QIQAQKFSTPI----               | NRAS-----                       |      | 1261 |
| TR | A0A2Z1Q3B3 | A0A2Z1Q3B3_9VIRU | QLNEDILRHKPVE--VNDAAAEV-QIQAQKFAKPL----                | DRAS-----                       |      | 1266 |
| TR | D0TZ29     | D0TZ29_9VIRU     | HLQPEFLAQKPV--PNDSSAAEV-QRRVPKYGVPS----                | FPAHD---P-----                  | FKEL | 1293 |
| TR | A0A7G3W8V4 | A0A7G3W8V4_9VIRU | KLSEKEVKHAPVE--VNDAAAEV-QREVRSGLGPV----                | SRPT-----                       |      | 662  |
| TR | A0A2Z5WAD8 | A0A2Z5WAD8_9VIRU | A-NPQRDRVTPIVRESNDGKVTVPKQESWLK-GDFV-----              |                                 |      | 1354 |

;

|     |            |                  |                                                         |                             |                          |                     |         |
|-----|------------|------------------|---------------------------------------------------------|-----------------------------|--------------------------|---------------------|---------|
| 1c1 | ORF2       | VQG-----         | RRSLSPRAN-----                                          | YLQRRAHDTSVDPDEPARLHHVRERPO | 1654                     |                     |         |
| TR  | H6UNN1     | H6UNN1_9VIRU     | VRG-----                                                | RTSPSKRSR-----              | SR-----                  | ENANAVDP-----       | 1223    |
| TR  | H6UNM9     | H6UNM9_9VIRU     | PLG-----                                                | RTPTPKRQR-----              | SP-----                  | SNTRNGGR-----       | 1252    |
| TR  | A0A7G4WLZ4 | A0A7G4WLZ4_9VIRU | AGS-----                                                | RRP-----                    |                          |                     | 1321    |
| TR  | A0A1P8DF80 | A0A1P8DF80_9VIRU | AGS-----                                                | RRS-----                    |                          |                     | 1321    |
| TR  | A0A514DCE7 | A0A514DCE7_9VIRU | RPHSRQS-----                                            | DRPA-----                   |                          | QRQ-----            | 1280    |
| TR  | A0A514D1M0 | A0A514D1M0_9VIRU | AGS-----                                                | RRSIKRQPS-----              |                          | AAEDHVAGKSNFRK----- | A-- 869 |
| TR  | A0A7S5WL3  | A0A7S5WL3_9VIRU  | KRSYTQVG--GRGKVEEIPAIDFSGRKAQPVAVTGSMPRPVYSQIAGRK-----  |                             |                          |                     | 1243    |
| TR  | A0A515KU39 | A0A515KU39_9VIRU | KRSYTQIG--GRGKVDQVPATDFLESEHQPVVVTGSLPRTVYQGQIAGRK----- |                             |                          |                     | 1342    |
| TR  | A0A7S5WLX7 | A0A7S5WLX7_9VIRU | RDYTSKAKQQYGSSEDNIPATDFATQHRPVAVAGSLPRTVYANLNPRK-----   |                             |                          |                     | 1221    |
| TR  | A0A7S5WL4  | A0A7S5WL4_9VIRU  | NETYNKAKQLYGSSEDNIPAVDFSATQRTVPVITGSLPRTVYANPNHRK-----  |                             |                          |                     | 1208    |
| TR  | A0A0M4L069 | A0A0M4L069_9VIRU | RNTYSKAKQQYGSSEDNIPAVDFATQHKPVAVTGSMLPRTVYANSNPRK-----  |                             |                          |                     | 1206    |
| TR  | A0A7S5WLW1 | A0A7S5WLW1_9VIRU | HDTYSKAKQQYGSSEDNIPATDFATQHKPVAVIAGSLPRTVYANLNPRK-----  |                             |                          |                     | 1221    |
| TR  | A0A0A7DSJ8 | A0A0A7DSJ8_9VIRU | -----                                                   | TTDPFGALKA-----             |                          | DKAVPGTYIQ-----     | 1272    |
| TR  | A0A2Z1Q370 | A0A2Z1Q370_9VIRU | AHGNHQPGSKPTPVVRLPPVRPE-----                            |                             | SQARGGYHTTAQGRTNHDP----- |                     | 1363    |
| TR  | E7BMX6     | E7BMX6_9VIRU     | -----                                                   | ITDPFAALKA-----             |                          | DKANPGTYIQ-----     | 1271    |
| TR  | A0A7L9R666 | A0A7L9R666_9VIRU | -----                                                   | VPDPFAMLA-----              |                          | DKANPGTYIQ-----     | 1272    |
| TR  | A0A346P9C1 | A0A346P9C1_9VIRU | PISYSEEDSRAASIS-----                                    |                             |                          |                     | 1476    |
| TR  | A0A2Z5WAE5 | A0A2Z5WAE5_9VIRU | PIG--GEADPSGSSAA-----                                   |                             |                          |                     | 1379    |
| TR  | A0A2L1GG75 | A0A2L1GG75_9VIRU | PIG--GEADPSGSSAA-----                                   |                             |                          |                     | 1393    |
| TR  | I1Y9U4     | I1Y9U4_9VIRU     | -----                                                   | TTDPFATLAG-----             |                          | DKRRPGTYIQ-----     | 1263    |
| TR  | A0A1B4ZA68 | A0A1B4ZA68_9VIRU | -----                                                   | GYG--AFPS-----              |                          | GTHAKGKSPM-----     | 1278    |
| TR  | A0A2Z1Q3B3 | A0A2Z1Q3B3_9VIRU | -----                                                   | GLG--SLPS-----              |                          | GTAKGKVS-----       | 1283    |
| TR  | D0TZ29     | D0TZ29_9VIRU     | S-----                                                  | EYDPSAEHPQ-----             |                          | GLEVS-----          | 1309    |
| TR  | A0A7G3W8V4 | A0A7G3W8V4_9VIRU | -----                                                   | VTDPFATLAA-----             |                          | DKQRPPTYIQ-----     | 682     |
| TR  | A0A2Z5WAD8 | A0A2Z5WAD8_9VIRU | -----                                                   | QKKSVN-----                 |                          |                     | 1360    |

|     |            |                                                             |                |                                           |                                  |      |      |
|-----|------------|-------------------------------------------------------------|----------------|-------------------------------------------|----------------------------------|------|------|
| 1c1 | ORF2       | SQPIVSDPSDRGAALKSLEWSNPKPFLPHDKQWLSQSIEDFP--PLPEQRPPP--LDSS | 1711           |                                           |                                  |      |      |
| TR  | H6UNN1     | H6UNN1_9VIRU                                                | -SPHGDSP-----  | DPEEWDVYPE-----                           | TTPHAPPT--QLTPD                  | 1255 |      |
| TR  | H6UNM9     | H6UNM9_9VIRU                                                | -PDILAQTS----- | DSEQEMDVYPE-----                          | RTSSDETP--KVQRG                  | 1284 |      |
| TR  | A0A7G4WLZ4 | A0A7G4WLZ4_9VIRU                                            | -----          | ERPPFFPHPGQNSPYMSAARSLADELSEHQHES--GEENG  |                                  | 1360 |      |
| TR  | A0A1P8DF80 | A0A1P8DF80_9VIRU                                            | -----          | DRPPFFSPHPGQNSPYMSGARSLAEELSEHQADF--DEKDG |                                  | 1360 |      |
| TR  | A0A514DCE7 | A0A514DCE7_9VIRU                                            | -----          | FDVP--ARPS--EDQPTR-----                   | PPY-----                         | 1297 |      |
| TR  | A0A514D1M0 | A0A514D1M0_9VIRU                                            | -----          | TAEN-----                                 | ATDLDSEYSSQNEGDSPDDPRQHMPPIRFQHA | 905  |      |
| TR  | A0A7S5WL3  | A0A7S5WL3_9VIRU                                             | -----          | RKNPEERVNTTR--DEASKN-----                 | TNL-----                         | 1264 |      |
| TR  | A0A515KU39 | A0A515KU39_9VIRU                                            | -----          | RKNPEEKIAASS--GHKPKN-----                 | PNL-----                         | 1363 |      |
| TR  | A0A7S5WLX7 | A0A7S5WLX7_9VIRU                                            | -----          | RKVPEPASPK-----                           | NQT-----                         | 1234 |      |
| TR  | A0A7S5WL4  | A0A7S5WL4_9VIRU                                             | -----          | RKAPEVSPR-----                            | TQA-----                         | 1221 |      |
| TR  | A0A0M4L069 | A0A0M4L069_9VIRU                                            | -----          | RKVPEPVSPK-----                           | VQT-----                         | 1219 |      |
| TR  | A0A7S5WLW1 | A0A7S5WLW1_9VIRU                                            | -----          | RKVPEPVSPK-----                           | RQT-----                         | 1234 |      |
| TR  | A0A0A7DSJ8 | A0A0A7DSJ8_9VIRU                                            | -----          | KST--E---H-----                           | VDY-----                         | 1280 |      |
| TR  | A0A2Z1Q370 | A0A2Z1Q370_9VIRU                                            | -----          | PTGMTVVVPKHERDLHYS GP-----                | TPT-----                         | 1386 |      |
| TR  | E7BMX6     | E7BMX6_9VIRU                                                | -----          | KSS--E---D-----                           | LAF-----                         | 1279 |      |
| TR  | A0A7L9R666 | A0A7L9R666_9VIRU                                            | -----          | KSA--E---H-----                           | LDY-----                         | 1280 |      |
| TR  | A0A346P9C1 | A0A346P9C1_9VIRU                                            | -----          |                                           |                                  |      |      |
| TR  | A0A2Z5WAE5 | A0A2Z5WAE5_9VIRU                                            | -----          |                                           |                                  |      |      |
| TR  | A0A2L1GG75 | A0A2L1GG75_9VIRU                                            | -----          |                                           |                                  |      |      |
| TR  | I1Y9U4     | I1Y9U4_9VIRU                                                | -----          | KNE--T---P-----                           | LNF-----                         |      | 1271 |

|    |            |                  |                               |      |
|----|------------|------------------|-------------------------------|------|
| TR | A0A1B4ZA68 | A0A1B4ZA68_9VIRU | -----LER--YHNNQ-----AES-----  | 1290 |
| TR | A0A2Z1Q3B3 | A0A2Z1Q3B3_9VIRU | -----MSP--EGSH-D-----QGP----- | 1294 |
| TR | D0TZ29     | D0TZ29_9VIRU     | -----R--GHTQG-----AST-----    | 1319 |
| TR | A0A7G3W8V4 | A0A7G3W8V4_9VIRU | -----KND--V---E-----VSF-----  | 690  |
| TR | A0A2Z5WAD8 | A0A2Z5WAD8_9VIRU | -----FADLPGLPEDSSVEQHNPPLTDDH | 1384 |

|     |            |                  |                                |                                            |                               |      |
|-----|------------|------------------|--------------------------------|--------------------------------------------|-------------------------------|------|
| lc1 | ORF2       | DHL----          | D-TADTSRIRNQPG--NSS----        | SQVDLSQIDWNGGPDVAVKASILDFTTKAS             | 1760                          |      |
| TR  | H6UNN1     | H6UNN1_9VIRU     | QEF-----                       | FAEKRVAS--K--LPA----                       | GAIDFSTLGDASTPMSSSAGAAAAMQOVQ | 1300 |
| TR  | H6UNM9     | H6UNM9_9VIRU     | ERTVQQVTLSDQHTRVRN--T--LPD---- | GAVDLSDVVPTGNAATDMDQYLDAFSQTLR             | 1336                          |      |
| TR  | A0A7G4WLZ4 | A0A7G4WLZ4_9VIRU | EESENTGEVSSDESRSRQNV--         | NPKESFRNRVRFGLDFVNDPHGSEDAIQRLEAFA         | 1418                          |      |
| TR  | A0A1P8DF80 | A0A1P8DF80_9VIRU | DGSENTGEVSSDESRSRQNI--         | NPKENFRNRVRFGLDFTNDPHGSEDAIQRLEAFA         | 1418                          |      |
| TR  | A0A514DCE7 | A0A514DCE7_9VIRU | ----KHVPEGGG-----              | AFGPPQPFEELAARIKLDQVTDGPDVYADR--SNADA----- | 1341                          |      |
| TR  | A0A514D1M0 | A0A514D1M0_9VIRU | DTS-VEGELTNGT-----             | AEAIARGMND--GVDLK                          | 932                           |      |
| TR  | A0A7S5WL3  | A0A7S5WL3_9VIRU  | ----HHIPKPGS-----              | TQPGGD-----VSVEHGPTDN-A-PHASEG-GDQQAISTAAQ | 1305                          |      |
| TR  | A0A515KU39 | A0A515KU39_9VIRU | ----HSVKGPGG-----              | VQADGS-----VSEHGPTDG-S-PHANR-GDGLAVSTAAQ   | 1404                          |      |
| TR  | A0A7S5WLX7 | A0A7S5WLX7_9VIRU | ----QRAIPGQ-----               | TQEDGS-----VSLDYNTHPAGR-DHATG-AEAARYEQAER  | 1276                          |      |
| TR  | A0A7S5WL3  | A0A7S5WL3_9VIRU  | ----QRISVPGQ-----              | KQEDGS-----VSLDYSTHPAGR-DHATG-SEAARYEQAER  | 1263                          |      |
| TR  | A0A0M4L069 | A0A0M4L069_9VIRU | ----QRIAVPGQ-----              | TQEDGS-----VSLDYGTHPAGR-DHATG-AEAARYEQAER  | 1261                          |      |
| TR  | A0A7S5WLW1 | A0A7S5WLW1_9VIRU | ----QRVAVPGQ-----              | AQEDGS-----VSLDYSTHPAGR-DHATG-AEAARYEQAER  | 1276                          |      |
| TR  | A0A0A7DSJ8 | A0A0A7DSJ8_9VIRU | ----DSL-----                   | GKEQLP-----QENFGHTG---ADVSV-QDGIATDSLAK    | 1313                          |      |
| TR  | A0A2Z1Q370 | A0A2Z1Q370_9VIRU | ----HQL-----                   | PP---IEEINETVNS-----SGVPP-QDGFSHESDLR      | 1417                          |      |
| TR  | E7BMX6     | E7BMX6_9VIRU     | ----DAL-----                   | GKEQLP-----QANFGHTG---ADVSV-QDGIATDSLAK    | 1312                          |      |
| TR  | A0A7L9R666 | A0A7L9R666_9VIRU | ----DTL-----                   | GKEQLP-----QENFGHTG---ADVSV-QDGLATDSLAK    | 1313                          |      |
| TR  | A0A346P9C1 | A0A346P9C1_9VIRU | -----D-----                    | AKD-----FSEAFNLGTGDE                       | 1492                          |      |
| TR  | A0A2Z5WAE5 | A0A2Z5WAE5_9VIRU | -----D-----                    | IARLAAGANQA-----TSSRTQHAFDVNT---           | 1404                          |      |
| TR  | A0A2L1GG75 | A0A2L1GG75_9VIRU | -----D-----                    | IARLAAGANQA-----TSSRTQHAFDVNT---           | 1418                          |      |
| TR  | I1Y9U4     | I1Y9U4_9VIRU     | ----DDL-----                   | VKEQLP-----ATNFGHTG---ADVNV-QDGIATDSLAK    | 1304                          |      |
| TR  | A0A1B4ZA68 | A0A1B4ZA68_9VIRU | ----DVV-----                   | RPITPP-----TQVFAPDD-RDTLNAAP-ADGQAVSSLA    | 1326                          |      |
| TR  | A0A2Z1Q3B3 | A0A2Z1Q3B3_9VIRU | ----DVV-----                   | LPAPPP-----AQTFAPDD-RDSLNAAP-ADGLAVSSLA    | 1330                          |      |
| TR  | D0TZ29     | D0TZ29_9VIRU     | ----SELRLTGSSSRTNDLPPGT----    | GTRITTPYGNN---TTDQNAVA-QDGLALTELA          | 1368                          |      |
| TR  | A0A7G3W8V4 | A0A7G3W8V4_9VIRU | ----DDL-----                   | VKEQLP-----TTNFGNAG---ADIGV-QDGIATDSLAK    | 723                           |      |
| TR  | A0A2Z5WAD8 | A0A2Z5WAD8_9VIRU | GTI---VEMSGALSD----            | PGEPPA---GS-----VWGGENPALK-G-----          | 1415                          |      |

|     |            |                  |                                |                           |      |
|-----|------------|------------------|--------------------------------|---------------------------|------|
| lc1 | ORF2       | -----            | ERVDMNPNPKN-----               | 1770                      |      |
| TR  | H6UNN1     | H6UNN1_9VIRU     | L-----                         | VDPEVTQPKN-----           | 1311 |
| TR  | H6UNM9     | H6UNM9_9VIRU     | N-----                         | ADAQVTSPPKN-----          | 1347 |
| TR  | A0A7G4WLZ4 | A0A7G4WLZ4_9VIRU | Q-----                         | ADATTRTPKN-----           | 1429 |
| TR  | A0A1P8DF80 | A0A1P8DF80_9VIRU | Q-----                         | ADATTRTPKN-----           | 1429 |
| TR  | A0A514DCE7 | A0A514DCE7_9VIRU | -----                          | YIPSFEQVEGLKRPFENFSGAQSYW | 1365 |
| TR  | A0A514D1M0 | A0A514D1M0_9VIRU | P-----                         | REMLTTPKN-----            | 943  |
| TR  | A0A7S5WL3  | A0A7S5WL3_9VIRU  | KMDE-AWQQY--                   | SKEHEAVKSAEN-----         | 1326 |
| TR  | A0A515KU39 | A0A515KU39_9VIRU | EMEK-AWQQY--                   | SDEHSGVKSAN-----          | 1425 |
| TR  | A0A7S5WLX7 | A0A7S5WLX7_9VIRU | ALAPPAGSDYPGGAEGQALRSAEN-----  | 1300                      |      |
| TR  | A0A7S5WL3  | A0A7S5WL3_9VIRU  | SLAPPVAEDFPQGGEGQALKSAEN-----  | 1287                      |      |
| TR  | A0A0M4L069 | A0A0M4L069_9VIRU | TLAPPVGSDDYPQNAEGQAMRSAEN----- | 1285                      |      |
| TR  | A0A7S5WLW1 | A0A7S5WLW1_9VIRU | ALAPPAGSDYPQGAEGQALRSAEN-----  | 1300                      |      |
| TR  | A0A0A7DSJ8 | A0A0A7DSJ8_9VIRU | N-----                         | 1314                      |      |
| TR  | A0A2Z1Q370 | A0A2Z1Q370_9VIRU | SR-----                        | VFETDGVNSDPNVVFQSEN-      | 1438 |
| TR  | E7BMX6     | E7BMX6_9VIRU     | N-----                         | 1313                      |      |
| TR  | A0A7L9R666 | A0A7L9R666_9VIRU | N-----                         | 1314                      |      |
| TR  | A0A346P9C1 | A0A346P9C1_9VIRU | -----                          | LSRERALLPKN-----          | 1503 |
| TR  | A0A2Z5WAE5 | A0A2Z5WAE5_9VIRU | -----                          | SPKN-----                 | 1408 |
| TR  | A0A2L1GG75 | A0A2L1GG75_9VIRU | -----                          | SPKN-----                 | 1422 |
| TR  | I1Y9U4     | I1Y9U4_9VIRU     | N-----                         | 1305                      |      |
| TR  | A0A1B4ZA68 | A0A1B4ZA68_9VIRU | N-----                         | 1327                      |      |
| TR  | A0A2Z1Q3B3 | A0A2Z1Q3B3_9VIRU | N-----                         | 1331                      |      |
| TR  | D0TZ29     | D0TZ29_9VIRU     | N-----                         | 1369                      |      |
| TR  | A0A7G3W8V4 | A0A7G3W8V4_9VIRU | N-----                         | 724                       |      |
| TR  | A0A2Z5WAD8 | A0A2Z5WAD8_9VIRU | -----                          |                           |      |

+++++

Query ORF1: query sequence and 24 best matches aligned

+++++

CLUSTAL O(1.2.4) multiple sequence alignment

|     |        |              |       |
|-----|--------|--------------|-------|
| lc1 | ORF1   | -----        |       |
| TR  | H6UNN2 | H6UNN2_9VIRU | ----- |
| TR  | H6UNN0 | H6UNN0_9VIRU | ----- |



|    |                       |                  |                                                               |    |
|----|-----------------------|------------------|---------------------------------------------------------------|----|
| TR | A0A7G4WLZ5            | A0A7G4WLZ5_9VIRU | -----                                                         |    |
| TR | A0A1P8DF89            | A0A1P8DF89_9VIRU | -----                                                         |    |
| TR | A0A514DCG4            | A0A514DCG4_9VIRU | -----                                                         |    |
| TR | A0A346P9C2            | A0A346P9C2_9VIRU | -----MN-----LA--AVNSYKLS----                                  | 12 |
| TR | A0A0A7DRW1            | A0A0A7DRW1_9VIRU | -----MLSAYELLSKH-----SQGAKRVV--AGLTDSMS----                   | 27 |
| TR | A0A7L9R691            | A0A7L9R691_9VIRU | -----MLSAYELLSKH-----SQGAKRVV--AGLTDSMS----                   | 27 |
| TR | A0A0S4GAY8            | A0A0S4GAY8_9VIRU | -----MLPAYETLCRH-----SQGAQKVV--AGLTDSMS----                   | 27 |
| TR | I1Y9U5   I1Y9U5_9VIRU |                  | -----MLPAYETLSKH-----SQGAKKVV--AGLTDSMS----                   | 27 |
| TR | A0A7G3W8V5            | A0A7G3W8V5_9VIRU | -----MLPAYEKLSLH-----SQGAKKVV--AGLTDSMS----                   | 27 |
| TR | A0A0S4GA48            | A0A0S4GA48_9VIRU | -----MLPAYEMLSKH-----SQGAKKVV--AGLTDSMS----                   | 27 |
| TR | A0A7S5WLW9            | A0A7S5WLW9_9VIRU | -----                                                         |    |
| TR | A0A7S5WLW9            | A0A7S5WLW9_9VIRU | -----                                                         |    |
| TR | A0A2Z5WAE4            | A0A2Z5WAE4_9VIRU | -----                                                         |    |
| TR | A0A7S5WLX4            | A0A7S5WLX4_9VIRU | -----MHLFDEP----VK--AAVTDTLA----                              | 17 |
| TR | A0A3G8GGF4            | A0A3G8GGF4_9VIRU | -----                                                         |    |
| TR | A0A515KU26            | A0A515KU26_9VIRU | -----                                                         |    |
| TR | A0A7S5WLW5            | A0A7S5WLW5_9VIRU | -----                                                         |    |
| TR | A0A0M5KKP5            | A0A0M5KKP5_9VIRU | -----                                                         |    |
| TR | A0A2Z1Q3S4            | A0A2Z1Q3S4_9VIRU | -----MTDDNF----                                               | 6  |
| TR | A0A514D1L9            | A0A514D1L9_9VIRU | MKFQFLCSFVPFYIGQ--NHTLCLRIASLLQKAADHIYKFSVNEKVTSVDKLSSIFDMSDY | 59 |
| TR | A0A2Z1Q375            | A0A2Z1Q375_9VIRU | -----MFQSFLNLVSTETR-----INAEWPWIIPDPLIGEIA--QVLTRIRD----      | 40 |
| TR | D0TZ30   D0TZ30_9VIRU |                  | -----                                                         |    |
| TR | A0A1B4ZA62            | A0A1B4ZA62_9VIRU | -----MTDGNF----                                               | 6  |

|            |                       |                  |                                                               |     |
|------------|-----------------------|------------------|---------------------------------------------------------------|-----|
| lc1   ORF1 |                       | -----            |                                                               |     |
| TR         | H6UNN2   H6UNN2_9VIRU |                  | -----MLQYIFITPAPE                                             | 12  |
| TR         | H6UNN0   H6UNN0_9VIRU |                  | -----MFYDFESAVATYK-----LNQE--ASDITHALMQYIFFTPAPP              | 36  |
| TR         | A0A7G4WLZ5            | A0A7G4WLZ5_9VIRU | -----                                                         |     |
| TR         | A0A1P8DF89            | A0A1P8DF89_9VIRU | -----                                                         |     |
| TR         | A0A514DCG4            | A0A514DCG4_9VIRU | -----                                                         |     |
| TR         | A0A346P9C2            | A0A346P9C2_9VIRU | ----PGQSEEDSAI--IFDFVKIAEACD-----FNSP--PKNAFDAILCYIFLHPTPK    | 57  |
| TR         | A0A0A7DRW1            | A0A0A7DRW1_9VIRU | ----ASTYKMSGTTYPGWDFSRLYSKYN-----LSTP--PNSYEEAAVASVLLNPRPD    | 74  |
| TR         | A0A7L9R691            | A0A7L9R691_9VIRU | ----ASTYKMSGTTYPGWDFSRLYSKYN-----LSTP--PSSYEEAAVASVLLNPRPD    | 74  |
| TR         | A0A0S4GAY8            | A0A0S4GAY8_9VIRU | ----ASTYKMSGIAYEGWNFHYLYNKYN-----LDSP--PNSYEEAAVASVLLNPRPD    | 74  |
| TR         | I1Y9U5   I1Y9U5_9VIRU |                  | ----ASTYKMSGIAYEGWNHYLYNKYK-----LDSP--PSSYEEAAVASILLNPRPD     | 74  |
| TR         | A0A7G3W8V5            | A0A7G3W8V5_9VIRU | ----ASTYKMSGVTYEGWNFHYLYNKYN-----LDSP--PTS YEEAAVATVLLNPRPD   | 74  |
| TR         | A0A0S4GA48            | A0A0S4GA48_9VIRU | ----ASTYKMSGIAYEGWNFHYLYNKYK-----LDSP--PNSYEEAAVASILLNPRPD    | 74  |
| TR         | A0A7S5WLW9            | A0A7S5WLW9_9VIRU | -----MDDP--PENLVGAALRYIILHPVPI                                | 23  |
| TR         | A0A7S5WLW9            | A0A7S5WLW9_9VIRU | -----                                                         |     |
| TR         | A0A2Z5WAE4            | A0A2Z5WAE4_9VIRU | -----MSDGSV--FYDAEGLFEAYS-----LNEM--PKDAFTATVGYIILNPVPR       | 41  |
| TR         | A0A7S5WLX4            | A0A7S5WLX4_9VIRU | ----RRSPFKLRGKI--FYAFAEICAWEELATAPRLAINE--EERAIKAILIYIFIHPTPI | 69  |
| TR         | A0A3G8GGF4            | A0A3G8GGF4_9VIRU | -----MSDGSV--FYDAEGLFEAYS-----LNEM--PKDAFTATVGYIMILNPVPR      | 41  |
| TR         | A0A515KU26            | A0A515KU26_9VIRU | -----MGEF--PKDTAGAAALRYIILHPVPI                               | 23  |
| TR         | A0A7S5WLW5            | A0A7S5WLW5_9VIRU | -----                                                         |     |
| TR         | A0A0M5KKP5            | A0A0M5KKP5_9VIRU | -----                                                         |     |
| TR         | A0A2Z1Q3S4            | A0A2Z1Q3S4_9VIRU | ----TGSYKLSGKEYLGYDFS KIHSLYK-----LDRP--PTTLASA AAVARVMLHPQPD | 53  |
| TR         | A0A514D1L9            | A0A514D1L9_9VIRU | SCLASIKRCNLGESKIFFDIEGLYGYG-----LTDEIDCPNFDAIVYWLTLHPMP       | 112 |
| TR         | A0A2Z1Q375            | A0A2Z1Q375_9VIRU | ----GRHKMRDGSY--FYDFSRLYDLFE-----LSKP--PDSTAKACAASILLHPTPS    | 85  |
| TR         | D0TZ30   D0TZ30_9VIRU |                  | -----MSSKTYLGFNFNVLYRDYS-----LHRV--PENLQEAIVASVVLNPRPD        | 42  |
| TR         | A0A1B4ZA62            | A0A1B4ZA62_9VIRU | ----TGSYKLSGNEYPGYDFS KIHSLYK-----LDRP--PTTLASA AAVARVMLHPQPD | 53  |

|            |                       |                                                 |                                                                |    |     |
|------------|-----------------------|-------------------------------------------------|----------------------------------------------------------------|----|-----|
| lc1   ORF1 |                       | -----                                           |                                                                |    |     |
| TR         | H6UNN2   H6UNN2_9VIRU | SVWDFLPYNLIE-LAQSDPI-----LTSSAMKIL-----DQL----  | V                                                              | 44 |     |
| TR         | H6UNN0   H6UNN0_9VIRU | SVC DHLPGFLLTAWDPREPV-----ISKAGFTLA-----SKT---- | L                                                              | 69 |     |
| TR         | A0A7G4WLZ5            | A0A7G4WLZ5_9VIRU                                | -----MV-----SVA----                                            | V  | 6   |
| TR         | A0A1P8DF89            | A0A1P8DF89_9VIRU                                | -----                                                          |    |     |
| TR         | A0A514DCG4            | A0A514DCG4_9VIRU                                | -----                                                          |    |     |
| TR         | A0A346P9C2            | A0A346P9C2_9VIRU                                | TVFDLVPTFEAHENWQTKTF-----QPVLSQKSIDLINDLP-----                 |    | 93  |
| TR         | A0A0A7DRW1            | A0A0A7DRW1_9VIRU                                | ALNMTISP VYA---T-NELYATGSDV KPGIGSSWLTAFTTTTHL-HELRYERFEQS---- | N  | 125 |
| TR         | A0A7L9R691            | A0A7L9R691_9VIRU                                | ALNLSISPIYA---T-NELYAAPSPVKPGIGSAWLTDFSNTRL-PDLDRERFHQS----    | N  | 125 |
| TR         | A0A0S4GAY8            | A0A0S4GAY8_9VIRU                                | ALNLTVAPIAA---T-SALYESSKPYKFGIGSSWLRAFNETPL-HLLEQERFAQS----    | K  | 125 |
| TR         | I1Y9U5   I1Y9U5_9VIRU |                                                 | APNLTVAPIAA---T-NALYESSKPYKFGIGSSWLRAFNEVPL-HLQEQERFAQK----    | A  | 125 |
| TR         | A0A7G3W8V5            | A0A7G3W8V5_9VIRU                                | ALNLTVAPIAA---T-NLYESSKPYKFGIGSSWLRAFNETPI-HLLEQERFSQA----     | P  | 125 |
| TR         | A0A0S4GA48            | A0A0S4GA48_9VIRU                                | ALNLTVAPIAA---T-NALYESSKPYKFGIGSSWLRAFNEAPL-HLQEQERFMQK----    | A  | 125 |
| TR         | A0A7S5WLW9            | A0A7S5WLW9_9VIRU                                | QVFNFLPRLAVNAKA-LKGY-----KLSLGE GAINEILSQE-----                |    | 58  |
| TR         | A0A7S5WLW9            | A0A7S5WLW9_9VIRU                                | -----                                                          |    |     |
| TR         | A0A2Z5WAE4            | A0A2Z5WAE4_9VIRU                                | SIYQQIPTLG SNDKGISLHY-----KMSLTYSALDILNGY-----                 |    | 76  |
| TR         | A0A7S5WLX4            | A0A7S5WLX4_9VIRU                                | QVY EYIPRLAVNNSGLLSNF-----KLSYTRKAIDQVRADN-----                |    | 105 |
| TR         | A0A3G8GGF4            | A0A3G8GGF4_9VIRU                                | SIYQQIPTLG SNDKGISLDY-----KMSLTYSALDILNGY-----                 |    | 76  |
| TR         | A0A515KU26            | A0A515KU26_9VIRU                                | QVYNFLPRLAVNSDS-LKAY-----KMSLT EGAISEIVTQN-----                |    | 58  |

|    |            |                  |                                                             |     |
|----|------------|------------------|-------------------------------------------------------------|-----|
| TR | A0A7S5WLW5 | A0A7S5WLW5_9VIRU | -----                                                       |     |
| TR | A0A0M5KKP5 | A0A0M5KKP5_9VIRU | -----                                                       |     |
| TR | A0A2Z1Q3S4 | A0A2Z1Q3S4_9VIRU | ALNLAIPPIHQLSNP---LALSPPNVVALGHAWLRNLTATRITRRKKERLLSSITFGE  | 109 |
| TR | A0A514D1L9 | A0A514D1L9_9VIRU | EVFNFLPNFESF-FDLTIPIN-QQLKIPLNDSRLLIRNLI-----SHK-----S      | 156 |
| TR | A0A2Z1Q375 | A0A2Z1Q375_9VIRU | VVYNYIPSIMPDAPI-PEGLQLLASGGLVLNSQARQLRLLP-----              | 126 |
| TR | D0TZ30     | D0TZ30_9VIRU     | ALNLRVSPLDQLCGQ-NAPLQLGKTVLPGLGHAWLDAFHTAKKSRELELQRFSTHT--- | 97  |
| TR | A0A1B4ZA62 | A0A1B4ZA62_9VIRU | ALNLAIPPIHQLCNP----PLLSPPNKIALGSRWLQSLTSLRTRRRRKERLLSSISFGE | 109 |

|     |            |                  |                                                              |     |
|-----|------------|------------------|--------------------------------------------------------------|-----|
| 1c1 | ORF1       |                  | MSSEPCQVNDTIYRLYHNLEADQ-YSCATRVLTILGLRDI--P-----HERFK        | 45  |
| TR  | H6UNN2     | H6UNN2_9VIRU     | PDSATSAGKVYYDIYANNYNDE-FSCATRLLTILGFNEF--D-----GERFE         | 89  |
| TR  | H6UNN0     | H6UNN0_9VIRU     | HDSETIGPGGQKYMCPNMDRDE-YSCATRLLTILGLRDI--P-----MERKE         | 114 |
| TR  | A0A7G4WLZ5 | A0A7G4WLZ5_9VIRU | Q--RRSSVFIGEWNFYHNMHTDD-KSCATRLLSLLGVRSI--P-----RERFA        | 49  |
| TR  | A0A1P8DF89 | A0A1P8DF89_9VIRU | -----MHTDD-KSCATRLLSLLGVRSV--P-----RERFA                     | 27  |
| TR  | A0A514DCG4 | A0A514DCG4_9VIRU | -----MFGYRYLYNYGTS-ASCAIRLLDILGVEWRSV-----ADDSV              | 38  |
| TR  | A0A346P9C2 | A0A346P9C2_9VIRU | --RSQINLGGQHNYFLYRNDHVDL-GCCATRLATVLGYRY--TF-----SEHYN       | 137 |
| TR  | A0A0A7DRW1 | A0A0A7DRW1_9VIRU | ----FTFPSLKDFVLFNTYGESKTASCATRVLQLLGCAYPLVDSHHLALAKQ---ALRLG | 178 |
| TR  | A0A7L9R691 | A0A7L9R691_9VIRU | ----FSHTSLKDFCLFTNYGDSKNASCATRVLQLLGCAYPLVDSHHLALAKQ---ALRLG | 178 |
| TR  | A0A0S4GAY8 | A0A0S4GAY8_9VIRU | ----FQHPALADFTLFENYGLAPQASCATRVLELLGCVPVTDTHHLALAKQ---PMRLA  | 178 |
| TR  | I1Y9U5     | I1Y9U5_9VIRU     | ----FQHPALTEFTLFENYGSTPQASCATRVLELLGCVPVTDHHLALAKQ---PMRLA   | 178 |
| TR  | A0A7G3W8V5 | A0A7G3W8V5_9VIRU | ----FKHPDLNFTLFENYGTAPQASCATRVLELLGCVPVTDTHHLALAKQ---PMRLA   | 178 |
| TR  | A0A0S4GA48 | A0A0S4GA48_9VIRU | ----FQHPALTEFTLFENYGSTPQASCATRVLELLGCVPVTDTHHLALAKQ---PMRLA  | 178 |
| TR  | A0A7S5WLW9 | A0A7S5WLW9_9VIRU | --WEEHTVWSTRYVYPNDVGDF-DSCATRVFKILGIQWEQYI-----E-DKL         | 102 |
| TR  | A0A7S5WLW9 | A0A7S5WLW9_9VIRU | -----MGKYSYNTDSGTL-SSCATRVFTLLGIQWEHSI-----Y-DAV             | 37  |
| TR  | A0A2Z5WAE4 | A0A2Z5WAE4_9VIRU | ----NVPILKNYTWYPNDHVDL-NCCATRAAELLGYTH--TF-----TERAA         | 116 |
| TR  | A0A7S5WLX4 | A0A7S5WLX4_9VIRU | --S---SLVGNYSYYPNDSGTL-SSCATRVFNLLGIQWEHSI-----Y-DAV         | 145 |
| TR  | A0A3G8GGF4 | A0A3G8GGF4_9VIRU | ----NVPILKNYAWYPNDHVDL-NCCATRAAELLGYTH--TF-----TERAA         | 116 |
| TR  | A0A515KU26 | A0A515KU26_9VIRU | --STCGTIGSTLYWMPNDMGDF-DSCATRVFRLGLINWERYI-----E-DPV         | 102 |
| TR  | A0A7S5WLW5 | A0A7S5WLW5_9VIRU | -----                                                        |     |
| TR  | A0A0M5KKP5 | A0A0M5KKP5_9VIRU | -----                                                        |     |
| TR  | A0A2Z1Q3S4 | A0A2Z1Q3S4_9VIRU | FKSYEVNSRIGQYTYFPNYSGNLETSCATTLMSLLGNFYPIITDNDLLIKHTPSSTERPQ | 169 |
| TR  | A0A514D1L9 | A0A514D1L9_9VIRU | DDGQYQHTKDNTHIFFNYQADF-YSCATRALKILGLETL--V-----TEWGV         | 201 |
| TR  | A0A2Z1Q375 | A0A2Z1Q375_9VIRU | -QPLQVRVSLLSYNYENHGVIS-GVCIHRALHVLGLDNRYDH-----NELSAVG       | 174 |
| TR  | D0TZ30     | D0TZ30_9VIRU     | ---HRFG-SATYAYFSNFGDPEKASCATRLQLGLVYPFTDENHLSGPRP---SGRPE    | 149 |
| TR  | A0A1B4ZA62 | A0A1B4ZA62_9VIRU | FRSYPADSTVGAFYTFPNYSGNLETSCATTLMSLLGVMPYITDRSDLLRLGPDSTEKPR  | 169 |

|     |            |                  |                                                               |     |
|-----|------------|------------------|---------------------------------------------------------------|-----|
| 1c1 | ORF1       |                  | DVSKLGMHRPTLKFQILRCFDPFSLLTEIDTSVDSLDTN-----IVNSIMLAHLEEL     | 97  |
| TR  | H6UNN2     | H6UNN2_9VIRU     | DVNKVGMRFPQLLRLLTMSLQLGIVLRTEHENTETLGERDLTC-SLI-KDSIFYMSANEG  | 147 |
| TR  | H6UNN0     | H6UNN0_9VIRU     | DIHALGPIPIVFRKLLMACWHSSTFHLDDASHQFESATMR-----EAI-ENDIQL-SATPT | 167 |
| TR  | A0A7G4WLZ5 | A0A7G4WLZ5_9VIRU | DVDKVGWTVLNLQRLLLLSWHVGMVVDNTFEHIDSDGHPSKCL-ELMIQRSREFAS---S  | 105 |
| TR  | A0A1P8DF89 | A0A1P8DF89_9VIRU | DVDKVGWTVLNLQRLILLSWHVGMVIDSTFEHVNSDGHPSKCL-EIMIQRSREFAY---S  | 83  |
| TR  | A0A514DCG4 | A0A514DCG4_9VIRU | DVTKFGVLPEDFRTLISISSISDSVACLTLTDSVYNYENAIIDFLAAII-----PVYTR   | 91  |
| TR  | A0A346P9C2 | A0A346P9C2_9VIRU | DPYKLGVLQNETERMLSSSTWRRGKIVICYDE-PYDKPTDLLKHIAIT-----DSNLN    | 189 |
| TR  | A0A0A7DRW1 | A0A0A7DRW1_9VIRU | DPNKLGMQEPALANYLIAAWSPHSMVFDDSNABIEGFNE---EAYARLH-----A----   | 224 |
| TR  | A0A7L9R691 | A0A7L9R691_9VIRU | DPNKLGMQEPALANYLIAAWSPHSMVFDDSNABIEGVNE---EVAQLH-----A----    | 224 |
| TR  | A0A0S4GAY8 | A0A0S4GAY8_9VIRU | DPNKLGMELPALVNYLISAWSPHGMVFNDLAMTESIDE---NCYDDL-----K----     | 224 |
| TR  | I1Y9U5     | I1Y9U5_9VIRU     | DPNKLGMELPALVNYLISAWSPYGMVFNDLVLTDEVDE---STYLKLL-----E----    | 224 |
| TR  | A0A7G3W8V5 | A0A7G3W8V5_9VIRU | DPNKLGMELPALVNYLISAWSPYGMVFNDLILSEGVKE---LTYRLRL-----E----    | 224 |
| TR  | A0A0S4GA48 | A0A0S4GA48_9VIRU | DPNKLGMELPALVNYLISAWSPYGMVFNDLVLTGVDGVE---NTYCKLL-----E----   | 224 |
| TR  | A0A7S5WLW9 | A0A7S5WLW9_9VIRU | DPNKVGQVATVFTDLIHKAAAGPDVGISY---DGDTYGVSSD-----               | 141 |
| TR  | A0A7S5WLW9 | A0A7S5WLW9_9VIRU | DPAKFGVIADTFNKYVRSSWHPKLIITY---PCYDGKMPFPN-----               | 78  |
| TR  | A0A2Z5WAE4 | A0A2Z5WAE4_9VIRU | DPYKLGVLQEVEKMLLLTWTKDGIIRLSE-SYGEHTKYSDV-AEII-----SSWLH      | 167 |
| TR  | A0A7S5WLX4 | A0A7S5WLX4_9VIRU | DPAKFGVIAQTFISKYIRSSWHPKIQVIVY---SYDYDQNLPAHI-----            | 186 |
| TR  | A0A3G8GGF4 | A0A3G8GGF4_9VIRU | DPYKLGVLQEVEKMLLLTWTKDGIIRLSE-SYGEHTKYSDV-AKTI-----SSWLL      | 167 |
| TR  | A0A515KU26 | A0A515KU26_9VIRU | DPNKVGVMADVFDAMVHKAINDDVGVHRQ---RIKYDGLDYK-----               | 141 |
| TR  | A0A7S5WLW5 | A0A7S5WLW5_9VIRU | -----                                                         |     |
| TR  | A0A0M5KKP5 | A0A0M5KKP5_9VIRU | -----                                                         |     |
| TR  | A0A2Z1Q3S4 | A0A2Z1Q3S4_9VIRU | DPYKLGVPYPSFMAYICATVRPGIRVILEADAFEGPLERD--HFDAVI-----         | 215 |
| TR  | A0A514D1L9 | A0A514D1L9_9VIRU | DVHKYGLGSDVFIERLQVAWSPGVVLVHSDTFCEGDLQLRDLH-----RFKWHQMGNL    | 254 |
| TR  | A0A2Z1Q375 | A0A2Z1Q375_9VIRU | DHMKLGIHFQVLRLLAPLPPTHKRFFISCTSMDEHHSQ---ALSII-----S----      | 220 |
| TR  | D0TZ30     | D0TZ30_9VIRU     | DPYKLGVAFHQLVHACFTAFDPGFFTFMEMPFPSTEDKTLATMDSLS-----S----     | 198 |
| TR  | A0A1B4ZA62 | A0A1B4ZA62_9VIRU | DPYKLGVPYPDFMAFICATVRPGIRAFVTDADFEGPFSRD--FFESLV-----         | 215 |

|     |            |                  |                                                             |     |
|-----|------------|------------------|-------------------------------------------------------------|-----|
| 1c1 | ORF1       |                  | PA-RATHDMEVVLFLFNDHISLALAESFIR---RHSQVIE-----GALDRPHPNF     | 143 |
| TR  | H6UNN2     | H6UNN2_9VIRU     | WEAY-PNKPAMVIVLFDHIAFALRRDYLV---RIQEAYLYRYLDDN--GRTTT---FK  | 197 |
| TR  | H6UNN0     | H6UNN0_9VIRU     | PQYYGIAPPVLIVILYADHVAFALRKDWLA---SQAYGFVASDVLDS--GSTTTLLSIR | 221 |
| TR  | A0A7G4WLZ5 | A0A7G4WLZ5_9VIRU | AERSGLCEYYIHFNFDRHVSFAIKTAHLK---KYTQTL-----LEY--DSTT---PVH  | 151 |
| TR  | A0A1P8DF89 | A0A1P8DF89_9VIRU | AERSGLCGYYIHFNFDRHVSFAIKTAHLK---KYTQTL-----LAC--DTTT---PIH  | 129 |
| TR  | A0A514DCG4 | A0A514DCG4_9VIRU | --GRVVKPPEIIILFSDHVMFCIHGKTAD---RFDELN--SRLSSE---PLTKKEIN   | 139 |
| TR  | A0A346P9C2 | A0A346P9C2_9VIRU | NKQQPELTPQVIFWFYHNHVAFAINDDLTQ---DLTQHY--AKLWDDLKVKSGMPQVKR | 243 |

|    |            |                  |                                                              |     |     |
|----|------------|------------------|--------------------------------------------------------------|-----|-----|
| TR | A0A0A7DRW1 | A0A0A7DRW1_9VIRU | ---TFPSAPIL-VCLHDGHVITYAIRRNFLFAELANYRAAY---QNASPHLSAQD----  | KE  | 273 |
| TR | A0A7L9R691 | A0A7L9R691_9VIRU | ---TFPLAPIL-VCLHDGHVITYAIRRDFLYVELTNYRSAY---QNASPYLSGRD----  | KE  | 273 |
| TR | A0A0S4GAY8 | A0A0S4GAY8_9VIRU | ---DFPKAQIL-VCVHYGHISYAIRSALLQNELNIYRSAY---KNNTPQLTSSD----   | KT  | 273 |
| TR | I1Y9U5     | I1Y9U5_9VIRU     | ---DFPKAQVL-VCVHYGHISYAVRGTFQLAEALNTYRSAY---HNQTPHLTSLD----  | RD  | 273 |
| TR | A0A7G3W8V5 | A0A7G3W8V5_9VIRU | ---SFPHAQIL-VCVHHGHVSYAIRSLLQAEALNTYRSAY---QNQTPHLTSLE----   | RS  | 273 |
| TR | A0A0S4GA48 | A0A0S4GA48_9VIRU | ---DFPKAQVL-VCVHYGHVSYAVRGTFQLTELNYSRAF---HNQTPHLTSLD----    | KN  | 273 |
| TR | A0A7S5WL9  | A0A7S5WL9_9VIRU  | --TIRGASKRLEIFVFRDHVCFALRNDLYE---QIAELE--LLHQES--AGMKIVDVRK  |     | 191 |
| TR | A0A7S5WL9  | A0A7S5WL9_9VIRU  | --GWEQSDKELLFVYNDHVAYALRMDICS---RLRNLD--SDLRTYK-SRLAIKEMRD   |     | 129 |
| TR | A0A2Z5WAE4 | A0A2Z5WAE4_9VIRU | ALATDVARPKIIFIWYANHIAFAVDNKFLE---KQTNLF--ARLSIK--HQPSLRNTFN  |     | 219 |
| TR | A0A7S5WLX4 | A0A7S5WLX4_9VIRU | --DWGRSDKELLFVYNDHVSYAMRKDVFY---QLCRLG--EDLQNR-SRLAIKEVRD    |     | 237 |
| TR | A0A3G8GGF4 | A0A3G8GGF4_9VIRU | GLEADVAPRKIIFIWYANHIAFAVENKFLE---VQMDLF--ARLSIK--YQPSLRNTFN  |     | 219 |
| TR | A0A515KU26 | A0A515KU26_9VIRU | --LFAHAEEKIEIVILNDHVLFAIRCIDLYN---QVTQLD--NDLKRS--KNMKISTVRD |     | 191 |
| TR | A0A7S5WLW5 | A0A7S5WLW5_9VIRU | -----                                                        | MRD | 3   |
| TR | A0A0M5KKP5 | A0A0M5KKP5_9VIRU | -----                                                        | MRD | 3   |
| TR | A0A2Z1Q3S4 | A0A2Z1Q3S4_9VIRU | ---D-PSVKVLIVIHGSSHVSYVNSTLLNDELELYRDYAYFNASSFPATGFSIKQLLP   |     | 271 |
| TR | A0A514D1L9 | A0A514D1L9_9VIRU | INQVSAAPAWCVVIVQNDHVSFSIKDSILS---EQCIIPVKFKTNSN--SDFSPDYIS   |     | 308 |
| TR | A0A2Z1Q375 | A0A2Z1Q375_9VIRU | ---TYSGDHSCLVFVSHTHISFALNLSMISIRTYDELLEFLY--SHLP-----KGWLA   |     | 266 |
| TR | D0TZ30     | D0TZ30_9VIRU     | ---SFRPNCIL-AVVYPDHVQCVRRMSLETGLGYEENMLTYGHSRGQPLVTKAT----   | AP  | 250 |
| TR | A0A1B4ZAE6 | A0A1B4ZAE6_9VIRU | ---D-SGVRILIVHGVSHVSYVKTTFLODELDLYHDYAFNLNASSLPSLTGKSIKOLLP  |     | 271 |

|     |            |                                 |                                  |                     |     |
|-----|------------|---------------------------------|----------------------------------|---------------------|-----|
| 1c1 | ORF1       | PIALLLLQYLIQ-IGGNDLMFFFCVN----- | PHILDDLTAKLAKRLKE                | 238                 |     |
| TR  | H6UNN2     | H6UNN2_9VIRU                    | PINLILLKFLD-IVGEDLLWALCDT-----   | HELWVSRQPEAAKLLKQ   | 293 |
| TR  | H6UNN0     | H6UNN0_9VIRU                    | PINFLLLLPLD-EVGEDLVHYLIND-----   | KQLFNLETDPDVVKRLKE  | 315 |
| TR  | A0A7G4WLZ5 | A0A7G4WLZ5_9VIRU                | VTGMILLQYLN-IGAGDVLWFLITY-----   | EQLWNSKFLLDAVKILKN  | 246 |
| TR  | A0A1P8DF89 | A0A1P8DF89_9VIRU                | VTGMILLQYLN-VGAGDVLWYLITY-----   | EKLWDSKFLLDAVKILKD  | 224 |
| TR  | A0A514DCG4 | A0A514DCG4_9VIRU                | SLSLPMLTWIS-PAGQDLCLFFLLN-----   | SH-VLNLQFCDFYVKAKE  | 232 |
| TR  | A0A346P9C2 | A0A346P9C2_9VIRU                | ACALLLLPNLE-LTGTDLTRFICGN-----   | PWIFMQDFKTYVKFCKY   | 336 |
| TR  | A0A0A7DRW1 | A0A0A7DRW1_9VIRU                | VTTIALIPFLEGPAGRDLTLLFFLRN-----  | MPVICSLSTNQVAKWLKA  | 370 |
| TR  | A0A7L9R691 | A0A7L9R691_9VIRU                | ITTVALLPFLEGPAGRDLTLLFFLRN-----  | MPVICTLTTDQVAKWLKA  | 370 |
| TR  | A0A0S4GAY8 | A0A0S4GAY8_9VIRU                | VTTVTLLPFLEGAAGIDLTLLFFLRN-----  | MAVITTLSTNDAAKWLKA  | 370 |
| TR  | I1Y9U5     | I1Y9U5_9VIRU                    | ITTVSLLPFLEGAAGIDLTLLFFLRN-----  | MSTIVTLSTNDVAKWLKA  | 370 |
| TR  | A0A7G3W8V5 | A0A7G3W8V5_9VIRU                | VTTVALLPFLEGAAGVDLTLLFFLRN-----  | MPTIVTQTNDIAKWLKA   | 370 |
| TR  | A0A0S4GA48 | A0A0S4GA48_9VIRU                | ITTVALVPFLEGPAGIDLTLLFFLRN-----  | MSTIVTLSTNDVAKWLKA  | 370 |
| TR  | A0A7S5WLW9 | A0A7S5WLW9_9VIRU                | GCAILLPPTN-ISGVDISLFFLQN-----    | YKYILNKNFTEYITICKE  | 285 |
| TR  | A0A7S5WLW9 | A0A7S5WLW9_9VIRU                | GLAVILLPVVS-LAGEDIGLFLFLLQN----- | SGYLFNQGGFDYIKSCKA  | 223 |
| TR  | A0A2Z5WAE4 | A0A2Z5WAE4_9VIRU                | ATAVMLLPYLE-QAGRDIAIFLLNN-----   | TSIFNLKFSIDYVKTCKE  | 312 |
| TR  | A0A7S5WLX4 | A0A7S5WLX4_9VIRU                | GLAILLIPVVS-LAGEDIGLFLFLLN-----  | YRIFKQGFSDYIKICKA   | 331 |
| TR  | A0A3G8GGF4 | A0A3G8GGF4_9VIRU                | ATAVMLLPYLE-QAGRDIAIFLLNN-----   | TSIFNLKFSIDYVKTCKE  | 312 |
| TR  | A0A515KU26 | A0A515KU26_9VIRU                | ACALLLLPYTN-HTGTDLSLFLFLLQN----- | FKWISRLDFVDYIKVCKE  | 285 |
| TR  | A0A7S5WLW5 | A0A7S5WLW5_9VIRU                | GLAILLLPVVS-LAGEDIGLFLFLLQN----- | SGYLFNQGGFDYIKSCKA  | 97  |
| TR  | A0A0M5KKP5 | A0A0M5KKP5_9VIRU                | GLAILLLPYVS-LAGEDIGLFLFLLN-----  | SDYLFNQKFVDYIKTCKA  | 97  |
| TR  | A0A2Z1Q3S4 | A0A2Z1Q3S4_9VIRU                | VTTLLLIPLYLESAGVELTLLFFLRS-----  | ASVFFTLPEAEIAVKALKE | 368 |
| TR  | A0A514DL19 | A0A514DL19_9VIRU                | IHGLLLSILVD-EAGSDLLIYYAFT-----   | POLCTPLIADAAKLLKM   | 406 |

|    |            |                  |                                                               |     |
|----|------------|------------------|---------------------------------------------------------------|-----|
| TR | A0A2Z1Q375 | A0A2Z1Q375_9VIRU | AFNLTLLPFID-DLSEDIVLWLLHCNISSDALNALVFPKSLRVLTALFNAEFTTVAKAFKE | 377 |
| TR | D0T230     | D0T230_9VIRU     | ATTTLLPTLESKATPDILIFFLRN-----AEYLLATEFTTIVKRLKA               | 346 |
| TR | A0A1B4ZA62 | A0A1B4ZA62_9VIRU | LTTLTLLIPYLESHAGVELTLFFLR-----APVFFKLPFVEAVKSLKE              | 368 |
|    |            |                  | : : . :: . *                                                  |     |

|     |            |                  |                                                               |     |
|-----|------------|------------------|---------------------------------------------------------------|-----|
| 1c1 | ORF1       |                  | LHAYIRVNLRLPRFAFLNLSIGQREWARHLYGLETLVGRSELLELDITEEFKMRVADPA   | 298 |
| TR  | H6UNN2     | H6UNN2_9VIRU     | MHAQIKTAHRIPRLSAYFGRNYMARDWARRLYGLEVLVGRTEQFELDFSKEAIMRTIDPV  | 353 |
| TR  | H6UNN0     | H6UNN0_9VIRU     | YHTYSRLWHKPLCLMINYARSTHARDFARRLYGLDTLPGRSQQYTLDFTESEQVMRSIDPV | 375 |
| TR  | A0A7G4WLZ5 | A0A7G4WLZ5_9VIRU | AHIETRIKHKLPNVSIHYARSTFARPWARSLYGLDTLPGRSEKFNLFQSEQLMRMIDTS   | 306 |
| TR  | A0A1P8DF89 | A0A1P8DF89_9VIRU | AHVETRIKHKLPNVSIHYARSTFARPWARSLYGLDTLPGRSEKFNLMNFQSEQLMRMIDTS | 284 |
| TR  | A0A514DCG4 | A0A514DCG4_9VIRU | VHQFARMHGTLPSPFAKKFKNVREQRAWSDSIYGVDIIGGRSEKLEFSAEEMVMRIADPT  | 292 |
| TR  | A0A346P9C2 | A0A346P9C2_9VIRU | VHSMSTRHAQLPNYWLKYGRADEGRAWANAIYGFDIIGGRSELLSFDTKGEMLMRLADPV  | 396 |
| TR  | A0A0A7DRW1 | A0A0A7DRW1_9VIRU | AHAHARIFQCLPLALPAITIQEIRMYGDLIYGLDSLVRSELMLKLDFTAELFMRTADPI   | 430 |
| TR  | A0A7L9R691 | A0A7L9R691_9VIRU | AHAHARIFQSLPLALPAITIQEIRMYGDLIYGLDSLVRSELMLKLDFTAELFMRTADPI   | 430 |
| TR  | A0A0S4GAY8 | A0A0S4GAY8_9VIRU | AHAYTRIYQCMPLALPGLLIPQIRAYGDLVYGLDSLVRSELMLKLDFTGELLMRTADPI   | 430 |
| TR  | I1Y9U5     | I1Y9U5_9VIRU     | AHAYTRIYQCMPLALPGLLIPQIRAYGDLVYGLDSLVRSELMLKLDFTGELLMRTADPI   | 430 |
| TR  | A0A7G3W8V5 | A0A7G3W8V5_9VIRU | AHAYTRIYQCMPLALPGLLIPQIRAYGDLVYGLDSLVRSELMLKLDFTSELLMRTADPI   | 430 |
| TR  | A0A0S4GA48 | A0A0S4GA48_9VIRU | AHAYTRIYQCMPLALPGLLIPQIRAYGDLVYGLDSLVRSELMLKLDFTGELLMRTADPI   | 430 |
| TR  | A0A7S5WLW9 | A0A7S5WLW9_9VIRU | IHHYVRMVGALPLFLRISIDVQDDRAWANHIYGDIIGGRSELMLHLDFTKETVMRLIDPA  | 345 |
| TR  | A0A7S5WLW9 | A0A7S5WLW9_9VIRU | IQQYTRMNGALPNYFRTPQTACDRAWANQLYGLDVIGGRSELMLHLDFTETVMRLIDPA   | 283 |
| TR  | A0A2Z5WAE4 | A0A2Z5WAE4_9VIRU | IHTNVRLTQQLPGYHKKWPEAHKGRAWANNIYGDIIGGRSELIKFDTGEFVMRTIDPA    | 372 |
| TR  | A0A7S5WLX4 | A0A7S5WLX4_9VIRU | IQQYTRMNGALPSYLRTPQTECDRAWANQLYGLDVIGGRSELMLHLDFTETVMRLIDPA   | 391 |
| TR  | A0A3G8GGF4 | A0A3G8GGF4_9VIRU | IHANVRLTQQLPGYHKKWPEAHKGRAWANNIYGDIIGGRSELKLFDTGEFVMRTIDPA    | 372 |
| TR  | A0A515KU26 | A0A515KU26_9VIRU | VHHHVRMVGALPKYLRSIDVQDDRAWANNIYGDIIGGRSELMLHLDFTKETVMRLMDPA   | 345 |
| TR  | A0A7S5WLW5 | A0A7S5WLW5_9VIRU | IQQYTRMNGALPNYFRTPQTACDRAWANQLYGLDVIGGRSELMLHLDFTETVMRLIDPA   | 157 |
| TR  | A0A0M5KKP5 | A0A0M5KKP5_9VIRU | IQQYTRMNGALPNYFRTPQTACDRAWANQLYGLDVIGGRSELMLHLDFTETVMRLIDPA   | 157 |
| TR  | A0A2Z1Q3S4 | A0A2Z1Q3S4_9VIRU | VHNFIRQFSTIPGCGIPSLRITDARAYSDLLYGLDTIPGRSELNLDFDGLIMRAADPT    | 428 |
| TR  | A0A514D1L9 | A0A514D1L9_9VIRU | VHTTGRLYYTLSTMLRKYPVYTGSRYSARIYGLDTLVGRSEKPLDSAGEMLMRTVDPF    | 466 |
| TR  | A0A2Z1Q375 | A0A2Z1Q375_9VIRU | VHTQGRFLSHLLGFGRIRPIHLARGYGLVYGFDTLAGRSEKYEKASFVDECLMRSVDPH   | 437 |
| TR  | D0T230     | D0T230_9VIRU     | INQFIRIYQRIPLGLPAYNINQLREFSDSLCGLDVLPGRSELLSLDFNAELLMRMADPA   | 406 |
| TR  | A0A1B4ZA62 | A0A1B4ZA62_9VIRU | AHSYIRQFSTLPGSGIPSLRITDARAYSDLLYGLDTIPGRSELLTLDFTSELIMRAADPT  | 428 |
|     |            |                  | : : : * . : * . : * : : . * * *                               |     |

|     |            |                  |                                                                |     |
|-----|------------|------------------|----------------------------------------------------------------|-----|
| 1c1 | ORF1       |                  | LRGVPPELVDRDRSGNFSYIRFDT--SEYTRLLPQIANQMVESLLK--EKVVNLNDMHEFFQ | 353 |
| TR  | H6UNN2     | H6UNN2_9VIRU     | NRALPEIRTHLNG-FKYISFSH--TALQDMLPVATRKFVNQLLK--DTAALTTLDEFYD    | 407 |
| TR  | H6UNN0     | H6UNN0_9VIRU     | ERALPEIRELPSG-IKYLFSNH--EAYYTLMPKIVRDSLRLVLT--DHVTLQGLTEFFS    | 429 |
| TR  | A0A7G4WLZ5 | A0A7G4WLZ5_9VIRU | KRAWPAIVEDKYG-NKYIKFFP--DRYTEQVKKIARKTAEDLIQ--SQTNLETFTEFFS    | 360 |
| TR  | A0A1P8DF89 | A0A1P8DF89_9VIRU | KRAWPAIVEDKYG-NNYIKFFP--DKYTEQVKKIARKTAEDLIQ--SQTNLETFTEFFS    | 338 |
| TR  | A0A514DCG4 | A0A514DCG4_9VIRU | IRALPVIDRE--TG--LIALDR--HLYVAKRKEVTRAVVADLIR--PDVRLTLHHWFG     | 343 |
| TR  | A0A346P9C2 | A0A346P9C2_9VIRU | KRGKLVITDFGL-----DITQ--HGVDYLDIDVKTAEENLIT--DDVSAETLEHWYA      | 445 |
| TR  | A0A0A7DRW1 | A0A0A7DRW1_9VIRU | RRAVPTLVQTSKGF--ELNLSE--ELYETYEDRAINTTFREVLP--EKLNLSEFEAWYA    | 483 |
| TR  | A0A7L9R691 | A0A7L9R691_9VIRU | RRAVPTLTRATSGF--ELTLSE--ELYETYEDRAINTTFREVLP--DKLNLSEFEAWYA    | 483 |
| TR  | A0A0S4GAY8 | A0A0S4GAY8_9VIRU | KRAVPILQSTNAGY--ELHLNT--ALYDEYENRAINSTFNDLLP--ERINLESEFEAWYA   | 483 |
| TR  | I1Y9U5     | I1Y9U5_9VIRU     | QRAVPILQNTTAGY--ELHLST--ALYEEYEDRATNSTFNDLLP--EQINLESEFEAWYA   | 483 |
| TR  | A0A7G3W8V5 | A0A7G3W8V5_9VIRU | QRAVPILQNTNAGY--ELQLST--SMYEEYEDRATNSTFNDLLP--DHINLETFESWYA    | 483 |
| TR  | A0A0S4GA48 | A0A0S4GA48_9VIRU | QRAVPILQNTTAGY--ELHLST--ALYEEYEDRATNSTFNDLLP--EQINLESEFEAWYA   | 483 |
| TR  | A0A7S5WLW9 | A0A7S5WLW9_9VIRU | LRAVPYTYST--ER--RLYMSS--DLYERYEDESTQEAAREVIAKAAEDGVTLEGFDSWFD  | 399 |
| TR  | A0A7S5WLW9 | A0A7S5WLW9_9VIRU | LRAVPVYDIG--EG--RLYMSS--SLYEYEDATEEAAREVIAKAAEDGVTLEAFDNWFD    | 337 |
| TR  | A0A2Z5WAE4 | A0A2Z5WAE4_9VIRU | IRGILITTESKPNQ--LKYITG--PQYDSYLLSVIFRVTRKLR--PMVKLETMERWFN     | 425 |
| TR  | A0A7S5WLX4 | A0A7S5WLX4_9VIRU | LRAVPYTYDIG--ER--RLYMSS--SLYEYEDATEEAAREVIAKAAEDGVTLEAFDSWFD   | 445 |
| TR  | A0A3G8GGF4 | A0A3G8GGF4_9VIRU | IRGILITTESKPNQ--LKYITG--PQYDSYLLSVIFRVTRKLR--PMVKLETMERWFN     | 425 |
| TR  | A0A515KU26 | A0A515KU26_9VIRU | LRAVPYTYST--ER--RLYMSS--DLYERYEDESTQEAAREVIAKAAEDGVTLEGFDSWFD  | 399 |
| TR  | A0A7S5WLW5 | A0A7S5WLW5_9VIRU | LRAVPVYDIG--EG--RLYMSS--SLYEYEDATEEAAREVIAKAAEDGVTLEAFDTWFD    | 211 |
| TR  | A0A0M5KKP5 | A0A0M5KKP5_9VIRU | LRAVPVYDIG--EG--RLYMSS--SLYEYEDATEEAAREVIAKAAEDGVTLEAFDNWFD    | 211 |
| TR  | A0A2Z1Q3S4 | A0A2Z1Q3S4_9VIRU | IRAVPTIDRSG-----NLFFDY--EKYSSYETAARETFDSILP--NRISVESFSSWYD     | 478 |
| TR  | A0A514D1L9 | A0A514D1L9_9VIRU | RRGKLEIGTLANG-MRYLHYDTDGQYTRYMSVLTKQSFEALIK--EKTHAESFRHWFS     | 522 |
| TR  | A0A2Z1Q375 | A0A2Z1Q375_9VIRU | IRGIPKFDST--TK--QIYFDE--DAWTTMIKEVSREVVSELLE--RKVALTPFHKWYD    | 488 |
| TR  | D0T230     | D0T230_9VIRU     | IRGVPVLEG-----H--SLTFSS--SLYNQYEDVAIKQSFDDLLP--PVVQLEPFQWYN    | 455 |
| TR  | A0A1B4ZA62 | A0A1B4ZA62_9VIRU | IRAVPAIDATG-----KLVDY--EKYSLYETAARETFDSILP--SKISVESFASWYD      | 478 |
|     |            |                  | *. : : :                                                       |     |

|     |            |                  |                                                         |     |
|-----|------------|------------------|---------------------------------------------------------|-----|
| 1c1 | ORF1       |                  | SRLFWGASGGAPGAQVEWED-----GTRLRNLKRGALLGLKERQIRIDILD     | 398 |
| TR  | H6UNN2     | H6UNN2_9VIRU     | TRNYWASGGAPGAKITWEN-----SKEKYRVNKRKALLPKSRIRELLN        | 453 |
| TR  | H6UNN0     | H6UNN0_9VIRU     | ARAYWASGGAPGAKVTWDE-----SKEKLRNLKRGALLALREQIRIDLVF      | 475 |
| TR  | A0A7G4WLZ5 | A0A7G4WLZ5_9VIRU | NRMFWASGGAPGASVHWDD-----TKEKLRVNKRKALLSLKEQKVRNILE      | 406 |
| TR  | A0A1P8DF89 | A0A1P8DF89_9VIRU | NRMFWASGGAPGASVHWDD-----TKEKLRVNKRKALLSLKEQKARNILE      | 384 |
| TR  | A0A514DCG4 | A0A514DCG4_9VIRU | NRMWWSASGGAPGATITWQD-----TKEKLRNLKRGALLAISEGDIRRVLA     | 389 |
| TR  | A0A346P9C2 | A0A346P9C2_9VIRU | RRFFWGPPSGGAPGAKVSWTYASG-----ASDNFRLNKRKALLAIPFSQVQEILR | 494 |
| TR  | A0A0A7DRW1 | A0A0A7DRW1_9VIRU | RRMFWSASGGAPGAKITWSDREG-----GDKLRNLKRGALLAIPAMHFTKILE   | 531 |
| TR  | A0A7L9R691 | A0A7L9R691_9VIRU | RRMFWSASGGAPGAKITWSDREG-----GDKLRNLKRGALLAIPAMHFTKILE   | 531 |
| TR  | A0A0S4GAY8 | A0A0S4GAY8_9VIRU | RRMFWSASGGAPGAKIAWSDKNG-----GDAMRVNKRKALLAIPAAHFTNILE   | 531 |
| TR  | I1Y9U5     | I1Y9U5_9VIRU     | RRMFWSASGGAPGAKIAWSEKNG-----GDAMRVNKRKALLAIPAAHFTNILE   | 531 |

|    |            |                  |                                                              |     |
|----|------------|------------------|--------------------------------------------------------------|-----|
| TR | A0A7G3W8V5 | A0A7G3W8V5_9VIRU | RRMFWGASGGAPGAKIAWSEKNG-----GDAMRVNKRGALLAIPAAHFTNILE        | 531 |
| TR | A0A0S4GA48 | A0A0S4GA48_9VIRU | RRMFWGASGGAPGAKIAWSEKNG-----GDAMRVNKRGALLAIPAAHFTNILE        | 531 |
| TR | A0A7S5WL9  | A0A7S5WL9_9VIRU  | RRMFWGASGGAPGASIQWKK-----DNEKLRVNKRGALLNIPIDYIRKIMD          | 445 |
| TR | A0A7S5WL9  | A0A7S5WL9_9VIRU  | RRMYWGASGGAPGATITWKK-----NDEKLRVNKRGALLSIPRDYIRKVMN          | 383 |
| TR | A0A2Z5WAE4 | A0A2Z5WAE4_9VIRU | RRMFWAPSGGAPGAKLDWLTGDTERASLQQNRPDESRYLNKRGALLSLSLNDLKNTLS   | 485 |
| TR | A0A7S5WLX4 | A0A7S5WLX4_9VIRU | RRMYWGASGGAPGATITWRK-----NNEKLRVNKRGALLSIPKDYIKVMG           | 491 |
| TR | A0A3G8GGF4 | A0A3G8GGF4_9VIRU | RRMFWAPSGGAPGAKLDWLTGDTERASLQQNRPDESRYLNKRGALLSLSLNDLKNTLS   | 485 |
| TR | A0A515KU26 | A0A515KU26_9VIRU | RRMFWGASGGAPGATIQWKE-----NNEKLRVNKRGALLSIPVEYMRKIIS          | 445 |
| TR | A0A7S5WLW5 | A0A7S5WLW5_9VIRU | RRMYWGASGGAPGATITWKK-----NDEKLRVNKRGALLSIPKDYIRKVMN          | 257 |
| TR | A0A0M5KKP5 | A0A0M5KKP5_9VIRU | RRMYWGASGGAPGATITWRK-----NDEKLRVNKRGALLSIPRDYIRKVMN          | 257 |
| TR | A0A2Z1Q3S4 | A0A2Z1Q3S4_9VIRU | RRMFWAASGGAPGAKVTWTHSSDPQDSSDHEGNSREKLRINKRGALLAIPKHFMMKVL   | 538 |
| TR | A0A514D1L9 | A0A514D1L9_9VIRU | RRMFWGASGGAPGAKVTWKD-----DEKLRLNKRGALLAIPYRVEKLWK            | 567 |
| TR | A0A2Z1Q375 | A0A2Z1Q375_9VIRU | RRMFWGASGGSPGTIANWST-----GERLRLNKRGALLVTPEKSIRGMWD           | 533 |
| TR | D0TZ30     | D0TZ30_9VIRU     | RRMFWAASGGSPGSKITWNIQQA-----ESKMRLNKRGGALLAIPAAHFRSILE       | 503 |
| TR | A0A1B4ZA62 | A0A1B4ZA62_9VIRU | RRMFWAASGGAPGAKVTWTHQTQSD--LERADLNSKEEKLRLNKRGALLAIPKHFMMKVL | 537 |

|                                    |                                                                 |     |
|------------------------------------|-----------------------------------------------------------------|-----|
| 1c1   ORF1                         | GQHNSARISNHLRRLDDLDSKNVGMWDYSDFNINHTFILMAQHTLAMVEGLIRRGKTSGI    | 516 |
| TR   H6UNN2   H6UNN2_9VIRU         | GHSNSARIANQLRRIADLKENVGFMWDYADFNINHAYYLISDLLLARI EAVLSRAREP--   | 571 |
| TR   H6UNN0   H6UNN0_9VIRU         | GHSNPARIANQLRRLADLSHSGVMWDYADFNINHNFI LMAEELIARIDVMLERCTSP--    | 593 |
| TR   A0A7G4WLZ5   A0A7G4WLZ5_9VIRU | THDNPSRIANAMRRILDLKQRPGLMWDYADFNLNHTFFLMSQEY LARVEVLLERCDSH--   | 522 |
| TR   A0A1P8DF89   A0A1P8DF89_9VIRU | THDNPSRIANAMRRILDLKQRPGLMWDYADFNLNHTFFLMSQEY LARVEVLLERCDSH--   | 500 |
| TR   A0A514DCG4   A0A514DCG4_9VIRU | AHDNTARVANMLRRILEDLRS SHALMWDFADFNINHTFSDAQELYSVADVAERLSNE--    | 500 |
| TR   A0A346P9C2   A0A346P9C2_9VIRU | SHGNTARIANALRRISDLK RTPALMWDYADFNINHTLRMMLYTHTVRVMLLRLKYD--     | 606 |
| TR   A0A0A7DRW1   A0A0A7DRW1_9VIRU | ANAGAARLAAHARRLEALRHSVGMWDFADFNINHTFVGMEKLF SALSRELLARQYS--     | 642 |
| TR   A0A7L9R691   A0A7L9R691_9VIRU | ANAGAARLAAHARRLES LRHSVGMWDFADFNINHTFVGMEKLF SALSRELLTRAQYA--   | 642 |
| TR   A0A0S4GAY8   A0A0S4GAY8_9VIRU | ANAGAARLAAHANRLQMLRTQVGMWDFADFNINHTFTGMEKLF SALSARELLQRAKYS--   | 642 |
| TR   I1Y9U5   I1Y9U5_9VIRU         | ANAGAARLAAHANRLQALRTQVGMWDFADFNINHTFSGMEKLF STLARELLRRARYS--    | 642 |
| TR   A0A7G3W8V5   A0A7G3W8V5_9VIRU | ANAGAARLAAHASRLHALRTQVGMWDFADFNINHTFSGMEKLF SALSARELLRRARYS--   | 642 |
| TR   A0A0S4GA48   A0A0S4GA48_9VIRU | ANAGAARLAAHANRLQALRTQVGMWDFADFNINHTFTGMEKLF ATLARELLRRARYS--    | 642 |
| TR   A0A7S5WL9   A0A7S5WL9_9VIRU   | AHGLTARIANMLRRSEELRQHALMWDFSDFNINHTFRGMIKLYHVVSQVLLERGABA--     | 556 |
| TR   A0A7S5WL9   A0A7S5WL9_9VIRU   | AHDMTARIANAYRRIGE LEHNLGLMWDFADFNINHTFSGMIKLFNVTVKVLQERGEHA--   | 494 |
| TR   A0A2Z5WAE4   A0A2Z5WAE4_9VIRU | AHGNTTRLANSLRRLSDLT-RTSLMWDYADFNINHTIKQMQLLYYASVS VLLERSETL--   | 596 |
| TR   A0A7S5WLX4   A0A7S5WLX4_9VIRU | AHDMTARIANTYRRIGELERYHGLMWDFADFNINHTFRGMIKLFNVTVKVLQERGEHA--    | 602 |
| TR   A0A3G8GGF4   A0A3G8GGF4_9VIRU | AHGNTTRLANSLRRLSDLT-RTALMWDYADFNINHTIKQMQLLYYASVS VLLERSETL--   | 596 |
| TR   A0A515KU26   A0A515KU26_9VIRU | AHGLTARVANMLRRTEELKTAHALMWDFSDFNINHTFRGMMLKLFNVVCDVLVERGABA--   | 556 |
| TR   A0A7S5WLW5   A0A7S5WLW5_9VIRU | AHDMTARIANAYRRIGE LEHNLGLMWDFADFNINHTFTSGMIKLFNVTVKVLQERGEHA--  | 368 |
| TR   A0A0M5KKP5   A0A0M5KKP5_9VIRU | AHDMTARIANAYRRIGE LERNHGLMWDFADFNINHTFSGMIKLFNVTVKVLQERGEHA--   | 368 |
| TR   A0A2Z1Q3S4   A0A2Z1Q3S4_9VIRU | SNSGLPKIMGHVRR LKALKNQVGCMDYADFNINHTFEGMRLLYETLTAALLKRIDWK--    | 649 |
| TR   A0A514D1L9   A0A514D1L9_9VIRU | GHSTSGRIANAIRRLSDVKLRTPLMWDYSDFNINHTYVNMALGYLYTGKVIINRMVIP--    | 683 |
| TR   A0A2Z1Q375   A0A2Z1Q375_9VIRU | KHHSAARVANHIRRLEDLQSGVATMDFSDYLNLEHTFPQMLA IMKSAL EEMVARGRDD--  | 644 |
| TR   D0TZ30   D0TZ30_9VIRU         | ANAGFTKLTAHVERLQKLKCEVGLMWDFADFNINHTFDGMIKLF SALSARDNLLKRSRST-- | 614 |
| TR   A0A1B4ZA62   A0A1B4ZA62_9VIRU | SNSGLPKIMGHVRR LKALKTQVGCMDYADFNINHTFEGMRLLYETLTAALLKRIDWK--    | 648 |

|                                    |                                                                |     |
|------------------------------------|----------------------------------------------------------------|-----|
| 1c1   ORF1                         | TPERMR--VISRDLHKAAAYTVIARFNTYLHDHD-SQLTIKTARGLQSGERQTSRINSDC   | 573 |
| TR   H6UNN2   H6UNN2_9VIRU         | SPARLQ--TVGADLNACAAFLVILARYNTYLYDHD-TDVAIRSMRGLQSGERDTSRVNSDA  | 628 |
| TR   H6UNN0   H6UNN0_9VIRU         | SGKELE--TLKKELYNCAFTVTARFNTYLSND-TGIVTQAKRGLQSGERDTSRVNSDS     | 650 |
| TR   A0A7G4WLZ5   A0A7G4WLZ5_9VIRU | LPMDVQN-TIRADMRAATAYAILARYNTYLHDPE-TMITTQAVRSLQSGERGTSINSDS    | 580 |
| TR   A0A1P8DF89   A0A1P8DF89_9VIRU | LPMDVQN-TIRADMRAATAYAILARYNTYLHDPE-TMITTQAVRSLQSGERGTSINSDS    | 558 |
| TR   A0A514DCG4   A0A514DCG4_9VIRU | NTSDLSRNIVRQDLSRVALHIVNARHNTYLSSTGGADPIIRAVRSLQSGERGTSFTNSMS   | 560 |
| TR   A0A346P9C2   A0A346P9C2_9VIRU | IPSRTLA-QIRQDFTDTRLXRTLNARNNTYLIDND-SDVIVRAQRSLQSGERGTSSTNSFF  | 664 |
| TR   A0A0A7DRW1   A0A0A7DRW1_9VIRU | NNPASTQ-KAARDIKQITSWVNAARHKTYLSND-SHAVLEIKRSLQSGERATMWNTLR     | 700 |
| TR   A0A7L9R691   A0A7L9R691_9VIRU | NNPAATQ-KAARDIKQITSWVNAARHKTYLSND-TQAILEIKRSLQSGERATMWNTLR     | 700 |
| TR   A0A0S4GAY8   A0A0S4GAY8_9VIRU | NGPQHTQ-QAAQDIKQITAWVNAARHKTYLSND-TKAVLEIKRSLQSGERATMWNTLR     | 700 |
| TR   I1Y9U5   I1Y9U5_9VIRU         | NGPQHTQ-QAAQDIKQITAWVNAARHKTYLSND-TKAVLEIKRSLQSGERATMWNTLR     | 700 |
| TR   A0A7G3W8V5   A0A7G3W8V5_9VIRU | NGPQHTQ-QAARDIKQITAWVNAARHKTYLSND-TKAVLEIKRSLQSGERATMWNTLR     | 700 |
| TR   A0A0S4GA48   A0A0S4GA48_9VIRU | NGPHHTQ-QAAQDIKQITAWVNAARHKTYLSND-TKAVLEIKRSLQSGERATMWNTLR     | 700 |
| TR   A0A7S5WLW9   A0A7S5WLW9_9VIRU | TPPHIYE-AAKNNDINTATAWIKQARERTYVQDND-TGFVSKLVRSLSQSGERGTSFTNSMR | 614 |
| TR   A0A7S5WLW9   A0A7S5WLW9_9VIRU | TPPHIYV-SAKEDLESALKWVRVARDNTYVKDND-TGFVSKLVRSLSQSGERATSFVNAMR  | 552 |
| TR   A0A2Z5WAE4   A0A2Z5WAE4_9VIRU | TSQGLVK-QIWNMDLDALKFSMDAKGAAYLHSAL-AKLTVLAARSLQSGERATSYVNSMS   | 654 |
| TR   A0A7S5WLX4   A0A7S5WLX4_9VIRU | TPPHIYT-NAVEDLGSALKWIRVARENTYVKDND-TGFISKLVRSLSQSGERATSFVNAMR  | 660 |
| TR   A0A3G8GGF4   A0A3G8GGF4_9VIRU | TSQGLVK-QIWNMDLDALKFSMDAKGAAYLHSAL-AKLTVLAARSLQSGERATSYVNSMS   | 654 |
| TR   A0A515KU26   A0A515KU26_9VIRU | TPKHIYE-AARKDIKAATAWILKARERTYVQDND-TGYISKLVRSLSQSGERGTSFTNSMR  | 614 |
| TR   A0A7S5WLW5   A0A7S5WLW5_9VIRU | TPPHIYV-SAKEDLESALKWVRVARDNTYVKDND-TGFVSKLVRSLSQSGERATSFVNAMR  | 426 |
| TR   A0A0M5KKP5   A0A0M5KKP5_9VIRU | TPPHIYV-SAKEDLESALKWVRVARDNTYVKDND-TGFVSKLVRSLSQSGERATSFVNAMR  | 426 |
| TR   A0A2Z1Q3S4   A0A2Z1Q3S4_9VIRU | NTPGDTQ-EAYNDIKRISSWVVRARLSTYVQDND-TGNIMKLARSLQSGERGTSFTNTLR   | 707 |
| TR   A0A514D1L9   A0A514D1L9_9VIRU | RNSKLYE-EIVDNISDDIRYIIQARFNTYLADDE-LGIMVKAVRSLQSGERATSDINTTQ   | 741 |
| TR   A0A2Z1Q375   A0A2Z1Q375_9VIRU | TMPTDYA-DAVGDLAAGDYVMTARARTFLNDKL-SGLVVRIVRGLQSGERSTSFNTLC     | 702 |
| TR   D0TZ30   D0TZ30_9VIRU         | GTP-MYE-EAVNDITTTIKWVEAARSNTFISDND-AGNIAQVVRSLQSGERATSWINTLR   | 671 |
| TR   A0A1B4ZA62   A0A1B4ZA62_9VIRU | NTPGDTQ-EAYRDIKRISSWVVRARLSTYVQDND-SGNIMKLARSLQSGERGTSFTNTLR   | 706 |

: :                    \* :       : :                    \* . \* \* \* \* \* \*       \* :

|                                    |                                                                 |     |
|------------------------------------|-----------------------------------------------------------------|-----|
| 1c1   ORF1                         | NYIDTLFVRLVSKRFFGYDVL-NPVADHSGDDAFETTKNYSOGMFAALYNLTGAAGQAH     | 632 |
| TR   H6UNN2   H6UNN2_9VIRU         | NRVDTEIVQMLGKKILGYTLL-KPHIDASGDDAFELTNSVSDAMYASALYNLTGAAGQVH    | 687 |
| TR   H6UNN0   H6UNN0_9VIRU         | NDIDTRIVRHISKRMGLGYDCI-HPIVDESDDAFETTASLSDAMLASSLYNLGSAAGQVY    | 709 |
| TR   A0A7G4WLZ5   A0A7G4WLZ5_9VIRU | NETDTTIVRRVCKEMLGIDPI-VSVTDHAGDDAFENVISMTYAPLVCVSYNLGSAAGQAY    | 639 |
| TR   A0A1P8DF89   A0A1P8DF89_9VIRU | NETDTTIVRRVCKEMLGIDPI-VPVTDHAGDDAFENVISMTYAPLVCVSYNLGSAAGQAY    | 617 |
| TR   A0A514DCG4   A0A514DCG4_9VIRU | SEIDYQLVVYVLNEMLGINLRSSSRGDKLGDDVFPVPNMFTAILVCIVYNLTGAAGQLY     | 620 |
| TR   A0A346P9C2   A0A346P9C2_9VIRU | NKVDASIVRETGRLLGYDLL-PFASDKLGDDDFETVGHLLDAIYACSLFNLGSAAGQIX     | 723 |
| TR   A0A0A7DRW1   A0A0A7DRW1_9VIRU | NNVDHRIVSLASEQLFGYDLA-PDAGDKTGDDVFLTTRTVGDAVLMSAMYNLCAAGQAH     | 759 |
| TR   A0A7L9R691   A0A7L9R691_9VIRU | NNVDHRIVSLASEQLFGYDLA-PDAGDKTGDDVFLTTRTVGDAVLMSALYNLCAAGQAH     | 759 |
| TR   A0A0S4GAY8   A0A0S4GAY8_9VIRU | NNVDHRIVSLAAEKLFGYDLA-PQPGHKTGDDVFLTKTVGDAVLMSALYNLCAAGQAH      | 759 |
| TR   I1Y9U5   I1Y9U5_9VIRU         | NNVDHRIVSLAAEKLFGYDLA-PQSGHKTGDDVFLVTKTVGDAVLMSALYNLCAAGQAH     | 759 |
| TR   A0A7G3W8V5   A0A7G3W8V5_9VIRU | NNVDHRIVSLAAEKLFGYDLA-PQPGHKTGDDVFLTKTVGDAVLMSALYNLCAAGQAH      | 759 |
| TR   A0A0S4GA48   A0A0S4GA48_9VIRU | NNVDHRIVSLTAEKLFGYDLA-PQAGHKTGDDVFLTKTVGDAVLMSALYNLCAAGQAH      | 759 |
| TR   A0A7S5WLW9   A0A7S5WLW9_9VIRU | NHIDFLIVKKTGSELFNTNFL-SQKGDQKQDDVFLPTKNMKEAVLACALYNITGSAGQLS    | 673 |
| TR   A0A7S5WLW9   A0A7S5WLW9_9VIRU | NHIDYLIVRKTAHNLF SRPFL-QKKGDKQKQDDVFLPVKNAVEATLACAIYNITGAAGQLS  | 611 |
| TR   A0A2Z5WAE4   A0A2Z5WAE4_9VIRU | NEVDTEIVKDTARRVLGMEVF-TGANDKLGDLDLFGTCSTMWEAVLTSALYNLTGSAGQVY   | 713 |
| TR   A0A7S5WLX4   A0A7S5WLX4_9VIRU | NHIDYLIVRKTAHNLF SRPFL-QKKGDKQKQDDVFLPVNAVEATLACAIYNITGAAGQLS   | 719 |
| TR   A0A3G8GGF4   A0A3G8GGF4_9VIRU | NEVDTEIVKDTARRVLGMEVF-TGANDKLGDLDLFGTCSTMWEAVLTSALYNLTGSAGQVY   | 713 |
| TR   A0A515KU26   A0A515KU26_9VIRU | NHIDYLIVRKTGSELFNTNFL-TRKGDQKQDDVFLPTKMDKEAVLACALYNITGSAGQLS    | 673 |
| TR   A0A7S5WLW5   A0A7S5WLW5_9VIRU | NHIDYLIVRKTAHNLF SRPFL-QKKGDKQKQDDVFLPVKNAVEATLACAIYNITGAAGQLS  | 485 |
| TR   A0A0M5KKP5   A0A0M5KKP5_9VIRU | NHIDYLIVRKTAHNLF SRPFL-QKKGDKQKQDDVFLPVKNAVEATLACAIYNITGAAGQLS  | 485 |
| TR   A0A2Z1Q3S4   A0A2Z1Q3S4_9VIRU | SNIDHGINVRAAALFGRPLT-HTQGDKTGDDVFLTRTMRDALLCALFNLTGSAAGQVY      | 766 |
| TR   A0A514D1L9   A0A514D1L9_9VIRU | NDIAVRLMDDASKRLFGFSVI-HSVGDRAGDDAFLTAKSLLYGSLCALFNLTGSAAGQVY    | 800 |
| TR   A0A2Z1Q375   A0A2Z1Q375_9VIRU | NKVD SVMVDRVAEQLFGRRLI-THQGDRLGDDVFLPVKNADMKDSILMCALFNLLGSSGQLY | 761 |
| TR   D0TZ30   D0TZ30_9VIRU         | NHVDHVIQQASHNLF GYNVS-PTQGYKTGDDVFLTPVSMQDALLTCAMYNLCGAGQVS     | 730 |
| TR   A0A1B4ZA62   A0A1B4ZA62_9VIRU | SNIDHGINVRTAAALFGRPLT-YTQGDKTGDDVFLVTRTMRDAILLCSLFNLGSAAGQVY    | 765 |

.       : :                    . .                    \* \* \*       .       . : : : \* : \*

|                                    |                                                     |     |
|------------------------------------|-----------------------------------------------------|-----|
| 1c1   ORF1                         | KILMSYP-----SRG-GGLGEYLRLAYDAANRKCVCYPIRAMMGLIHGE   | 675 |
| TR   H6UNN2   H6UNN2_9VIRU         | KVSICRP-----TAG-GAEGEFLRLHYDARTHSVSGYPPIRAMVGFSGHGE | 730 |
| TR   H6UNN0   H6UNN0_9VIRU         | KISVSLP-----SYG-GAAGEFLRLPPAANRNRGRDPNRAVGGFSGHGE   | 752 |
| TR   A0A7G4WLZ5   A0A7G4WLZ5_9VIRU | KIAVSYA-----TFN-GASGEFLRLSYDAASNHIAGYPIRGMGFIHGE    | 682 |
| TR   A0A1P8DF89   A0A1P8DF89_9VIRU | KIAVSYA-----TFN-GASGEFLRLSYDAASNHIAGYPIRGMGFIHGE    | 660 |
| TR   A0A514DCG4   A0A514DCG4_9VIRU | KITNDYS-----DQV-GARGEYLRAYDAATPRVTGYPIRAMMGVIHGE    | 663 |
| TR   A0A346P9C2   A0A346P9C2_9VIRU | KILVEWV-----GKR-GSQGEYLRQNYDAATPTICGYPLRAMMGLIHGE   | 766 |
| TR   A0A0A7DRW1   A0A0A7DRW1_9VIRU | KILLSYP-----QHG-GARGEYVRYAYDASANRVSGYPLRALAGVVHGE   | 802 |
| TR   A0A7L9R691   A0A7L9R691_9VIRU | KILLSYP-----QHG-GARGEYVRYAYDASANRVSGYPLRALAGVVHGE   | 802 |
| TR   A0A0S4GAY8   A0A0S4GAY8_9VIRU | KILLSYP-----QHG-GARGEYVRYAYDASANRVSGYPLRALAGVVHGE   | 802 |
| TR   I1Y9U5   I1Y9U5_9VIRU         | KILLSYP-----QHG-GARGEYVRYAYDASANRVSGYPLRALAGVVHGE   | 802 |
| TR   A0A7G3W8V5   A0A7G3W8V5_9VIRU | KILLSYP-----QHG-GARGEYVRYAYDASANRVSGYPLRALAGVVHGE   | 802 |
| TR   A0A0S4GA48   A0A0S4GA48_9VIRU | KILLSYP-----QHG-GARGEYVRYAYDASANRVSGYPLRALAGVVHGE   | 802 |
| TR   A0A7S5WLW9   A0A7S5WLW9_9VIRU | KITNDYS-----KPK-GARGEYLRAYDASHARTVSGYPIRAMMGVIHGE   | 716 |
| TR   A0A7S5WLW9   A0A7S5WLW9_9VIRU | KITNDYH-----KPE-AARGEYLRAYDGRNRIVSGYPIRAMMGVIHGE    | 654 |

|    |            |                  |                                                              |     |
|----|------------|------------------|--------------------------------------------------------------|-----|
| TR | A0A2Z5WAE4 | A0A2Z5WAE4_9VIRU | KLTMEYG-----GDI-SSYGEYLRLSYDQNNVTVTGYAPRAMMGFIHGE            | 756 |
| TR | A0A7S5WLX4 | A0A7S5WLX4_9VIRU | KITNDYH-----QPE-AARGEYLRYAYDGKSRIVSGYPIRAMMGVIHGE            | 762 |
| TR | A0A3G8GGF4 | A0A3G8GGF4_9VIRU | KLTMEYG-----GDI-SSYGEYLRLSYDQNNVTVTGYAPRAMMGFIHGE            | 756 |
| TR | A0A515KU26 | A0A515KU26_9VIRU | KITNDYS-----KPK-GARGEYLRYAYDANANTVSGYPIRAMMGVIHGE            | 716 |
| TR | A0A7S5WLW5 | A0A7S5WLW5_9VIRU | KITNDYH-----KPE-AARGEYLRYAYDGRSRIVSGYPIRAMMGVIHGE            | 528 |
| TR | A0A0M5KKP5 | A0A0M5KKP5_9VIRU | KITNDYH-----KPE-AARGEYLRYAYDGRTRIVSGYPIRAMMGVIHGE            | 528 |
| TR | A0A2Z1Q3S4 | A0A2Z1Q3S4_9VIRU | KVLVSYP-----QLG-GARGEVFRYGYDASSGAVRGYPIRALSGFVHGE            | 809 |
| TR | A0A514D1L9 | A0A514D1L9_9VIRU | KINMNAIRNNALGSISTINSDRLISS-AGSGEFLRLSYDGATNEICGYPLRAMMGFIHGE | 859 |
| TR | A0A2Z1Q375 | A0A2Z1Q375_9VIRU | KITSEYC-----SPKNPGRGEFLRHSYDGASGRVSGYPIRAIVGFVHGE            | 805 |
| TR | D0TZ30     | D0TZ30_9VIRU     | KIFVSYP-----ELG-GSRGEFVRGYDAGSNSVRGYPLRALTGLVHGE             | 773 |
| TR | A0A1B4ZA62 | A0A1B4ZA62_9VIRU | KVLVSYP-----QLG-GARGEVFRYGYDASSGAVRGYPIRALSGFVHGE            | 808 |

\* : . \* : : \* . \* \* : \* . \*\*\*

|     |            |                                                             |                                                               |     |
|-----|------------|-------------------------------------------------------------|---------------------------------------------------------------|-----|
| lc1 | ORF1       | FFSNPIQPNERAAAFNLQAQKLRRRGFNVPDKLLKSIINANCFLVYTSDSGVKFTYRPN | 735                                                           |     |
| TR  | H6UNN2     | H6UNN2_9VIRU                                                | YFNEPVPQPAQRYAAFINQRAKLTRRGWSCPGPLFDAVVRKHTKLVTY-DSGIRHIYTPN  | 789 |
| TR  | H6UNN0     | H6UNN0_9VIRU                                                | VFSEPVQPAPERMAAFISQKQLSRRGWCHPCDALFQALVRVNCRLRRTLRSKGIIITFVPD | 812 |
| TR  | A0A7G4WLZ5 | A0A7G4WLZ5_9VIRU                                            | FFAEALPQPFDRLASFLNQRNKLQRRGWVAPESLFHAVCRYNTRLTYTLPDGTKRHFYPD  | 742 |
| TR  | A0A1P8DF89 | A0A1P8DF89_9VIRU                                            | FFAEALPQPFDRLASFLNQRNKLQRRGWVAPDSLFNAVCRYNTRLTYTLPDGTKRHFYPD  | 720 |
| TR  | A0A514DCG4 | A0A514DCG4_9VIRU                                            | FFSEPIPKPVERAATFIEQFSKLARRGWHPPTLLDNI IKRNCHVTYTAN-GLKRRVVPN  | 722 |
| TR  | A0A346P9C2 | A0A346P9C2_9VIRU                                            | FFSDPIQPFPNRTATLMQVAKLSRRGFTTPTRLINIWLKDNAALVYTNRQGVKKRIVGD   | 826 |
| TR  | A0A0A7DRW1 | A0A0A7DRW1_9VIRU                                            | FFTEPVTNPADRGATLIQQFAKVARRGVVLPDALLDMMLNASVSLAYTDS-KGKHRVTV   | 861 |
| TR  | A0A7L9R691 | A0A7L9R691_9VIRU                                            | FFTEPVTNPADRGATLIQQFAKVARRGVVLPDALLDIMLDASVSLAYTDS-KGKHRVTV   | 861 |
| TR  | A0A0S4GAY8 | A0A0S4GAY8_9VIRU                                            | FFTEPVTNPADRGATLIQQFAKVARRGVVLPDALLDAMLAKSTSLTYTKQ-GSKCRVTIP  | 861 |
| TR  | I1Y9U5     | I1Y9U5_9VIRU                                                | FFTEPVTNPADRGATLIQQFAKVARRGVVLPDALLDAMLAKSTSLTYTQ-RKKCRVTIP   | 861 |
| TR  | A0A7G3W8V5 | A0A7G3W8V5_9VIRU                                            | FFTEPVTNPADRGATLIQQFAKVARRGVVLPDALLDAMLVKSTSLTYTSD-GKKSHVTIP  | 861 |
| TR  | A0A0S4GA48 | A0A0S4GA48_9VIRU                                            | FFTEPVTNPADRGATLIQQFAKVARRGVVLPDALLDAMLAKSTSLTYTQ-RKKCRVTIP   | 861 |
| TR  | A0A7S5WLW9 | A0A7S5WLW9_9VIRU                                            | FFDEPIPKPLERAATFVEQFEKLRRRGWTPPKTLLDRAIKRNCHLVYTDG-GVKNRVVTP  | 775 |
| TR  | A0A7S5WLW9 | A0A7S5WLW9_9VIRU                                            | FFDEPIPKPLERAATFMEQFAKLQRRGWIPPKTLLERI IKRNCHLVYTHE-GVKNRVVTP | 713 |
| TR  | A0A2Z5WAE4 | A0A2Z5WAE4_9VIRU                                            | YMLDSVVTPIERTATILEQLNKLKRRGWCPPDHLVDSIVARNTSLVYTDKDGKHHVIGD   | 816 |
| TR  | A0A7S5WLX4 | A0A7S5WLX4_9VIRU                                            | FFDEPIPKPLERAATFMEQFAKLQRRGWIPPKTLLERI IKRNCHLVYTDN-GTKNRVVPK | 821 |
| TR  | A0A3G8GGF4 | A0A3G8GGF4_9VIRU                                            | YMLDSVVTPIERTATILEQLNKLKRRGWCPPDHLVDSI IARNTSLVYTDKDGKHHVIGD  | 816 |
| TR  | A0A515KU26 | A0A515KU26_9VIRU                                            | FFDEPIPKPLERAATFVEQFEKLRRRGWTPPDTLLEAIKRNCHLVYTTG-SGKKKVVD    | 775 |
| TR  | A0A7S5WLW5 | A0A7S5WLW5_9VIRU                                            | FFDEPIPKPLERAATFMEQFAKLQRRGWIPPKTLLERI IKRNCHLVYTHE-GIKNRVVP  | 587 |
| TR  | A0A0M5KKP5 | A0A0M5KKP5_9VIRU                                            | FFDEPIPKPLERAATFMEQFAKLQRRGWIPPKTLLERI IKRNCHLVYTHE-GIKNRVVP  | 587 |
| TR  | A0A2Z1Q3S4 | A0A2Z1Q3S4_9VIRU                                            | FFHDIHSPAERGAAILEQYAKLTRRGIHLPRGILESYLARATQLVYTQ-GVKHRVNVP    | 868 |
| TR  | A0A514D1L9 | A0A514D1L9_9VIRU                                            | FFAEPIDPPSRAATLLEQVSKLHRRGWHTPDWLFVKFSTCTLVFTTDAGIKKRFTPD     | 919 |
| TR  | A0A2Z1Q375 | A0A2Z1Q375_9VIRU                                            | FFSEPLPAIYDRAATILEQVAKIQRGCTLPMSLVNESIRFNCRITKTLDGSIKKTIVAD   | 865 |
| TR  | D0TZ30     | D0TZ30_9VIRU                                                | YFNDPIISPADRCATILEQSKKLARRGIVVPKPIVSRLISKNCITLYSEG-NRKIRTTVP  | 832 |
| TR  | A0A1B4ZA62 | A0A1B4ZA62_9VIRU                                            | FFHDIHSPAERGAAILEQYAKLTRRGIHLPKQVLESYLAATQLVYTDK-GSKHRVNVP    | 867 |

: : : . \* \* : : \* \* : \* \* \* : : : : :

|     |            |                                                            |                                                               |     |
|-----|------------|------------------------------------------------------------|---------------------------------------------------------------|-----|
| lc1 | ORF1       | LTLTVLPSILGGVGVQEDDKSL-VTAQLPISFK--Y--GRDGLSCVAISPL---LCDL | 786                                                           |     |
| TR  | H6UNN2     | H6UNN2_9VIRU                                               | PRLVTLPSAMGGFVGYDAKEL-VSGCSPPYEI--T--WRTRKYTALFIPSGEGKTTLAR   | 844 |
| TR  | H6UNN0     | H6UNN0_9VIRU                                               | PRLVQLPAAFGGIGIQYKDKNM-IVDSHKPYRV--H--SPARRVDCFYIPSGEGKTMLSM  | 867 |
| TR  | A0A7G4WLZ5 | A0A7G4WLZ5_9VIRU                                           | IETVLTAAFGGVGVDTVDSQL-LSQLSDKQIV--TPLHANCYDTIIPSGEGKTTLAR     | 799 |
| TR  | A0A1P8DF89 | A0A1P8DF89_9VIRU                                           | IETVLTAAFGGVGVDTVDSQL-LSQLSDKQIV--TPLHANCYDAIIVIPSGEGKTTLAR   | 777 |
| TR  | A0A514DCG4 | A0A514DCG4_9VIRU                                           | LELTVTAAALGGVGVTTETLEANIVTESFSGSRADSRSTAATDCTLALCIPSGEGKTSLSV | 782 |
| TR  | A0A346P9C2 | A0A346P9C2_9VIRU                                           | IHLATLPAVLGGIGITEAKDAVMVSTSNLLNIK-PPIQVAANTPVAVCIPSGEGKSTIAR  | 885 |
| TR  | A0A0A7DRW1 | A0A0A7DRW1_9VIRU                                           | RQLIALPAALGGVGVTTETNGILHSELSPVHR-----QANGSYAICIPSGEGKTTLAR    | 914 |
| TR  | A0A7L9R691 | A0A7L9R691_9VIRU                                           | RQLIALPAALGGVGVTTETANGILHSETSPVLR-----QVNGSYAVCIPSGEGKTTLAR   | 914 |
| TR  | A0A0S4GAY8 | A0A0S4GAY8_9VIRU                                           | RALIALPAALGGVGVTTETSGMLDASVVNT-----IMQDAFAICIPSGEGKTTLAR      | 914 |
| TR  | I1Y9U5     | I1Y9U5_9VIRU                                               | RDLIALPAALGGVGVTTETNGMLSAEESTTRT-----VMRDAFAICIPSGEGKTTLAR    | 914 |
| TR  | A0A7G3W8V5 | A0A7G3W8V5_9VIRU                                           | RDLIALPAALGGVGVTTETSGMLSSDDSTIRT-----VMRTAFAICIPSGEGKTTLAR    | 914 |
| TR  | A0A0S4GA48 | A0A0S4GA48_9VIRU                                           | RDLIALPAALGGVGVTTETNGMLSSDDSTIRT-----VMQEAFAICIPSGEGKTTLAR    | 914 |
| TR  | A0A7S5WLW9 | A0A7S5WLW9_9VIRU                                           | KELVTLPSVFGGIGVTNTIDGKNLVQAHWNVAG-TLVPEKRDGYFAIYIPSGEGKSTIAK  | 834 |
| TR  | A0A7S5WLW9 | A0A7S5WLW9_9VIRU                                           | LELVTLPAIFGGIGVTETISGAEMVQSQIPPLL-KNTLQELSGYIAVYIPSGEGKTTLAK  | 772 |
| TR  | A0A2Z5WAE4 | A0A2Z5WAE4_9VIRU                                           | KRLAITPAIFGGIGVTQTQDAEIVSAGAGGLIR-P---VNAKSVALIIPSGEGKTYTAM   | 871 |
| TR  | A0A7S5WLX4 | A0A7S5WLX4_9VIRU                                           | LELVTLPAIFGGIGVTETISGAEMVQSQVPPQL-TNTLQELGYIAIYIPSGEGKTTLAK   | 880 |
| TR  | A0A3G8GGF4 | A0A3G8GGF4_9VIRU                                           | KKLAITPAIFGGIGVTQTQDVEIVSAGAGGLIR-P---VNAKPVALIIPSGEGKTYTAM   | 871 |
| TR  | A0A515KU26 | A0A515KU26_9VIRU                                           | IELVTLPSAAGGIGVTNTIDGKNMTQTHWDVRG-AIVPPSRNGYIAVYIPSGEGKSTIAK  | 834 |
| TR  | A0A7S5WLW5 | A0A7S5WLW5_9VIRU                                           | LELVTLPAIFGGIGVTETISGAEMVQSQIPPLL-TNTLQELSGYIAVYIPSGEGKTTLAK  | 646 |
| TR  | A0A0M5KKP5 | A0A0M5KKP5_9VIRU                                           | PELVTLPAIFGGIGVTETISGAEMVQSHTPPLL-TNTLQELSGYIAVYIPSGEGKTTLAK  | 646 |
| TR  | A0A2Z1Q3S4 | A0A2Z1Q3S4_9VIRU                                           | LDLILTPAALGGVGISYNPSGLLSSVSGSSISE-----LQPIKAAIIPSGEGKTTLAQ    | 921 |
| TR  | A0A514D1L9 | A0A514D1L9_9VIRU                                           | LQLVTMPRAFGG-----                                             | 931 |
| TR  | A0A2Z1Q375 | A0A2Z1Q375_9VIRU                                           | PLLALTAAFGGIGVTRAQESQALITGGGSIIS--VANDTDDHRYAFLIPSGEGKSSLAR   | 923 |
| TR  | D0TZ30     | D0TZ30_9VIRU                                               | PELVELPAALGGVGVTDQLDARLVTASSSLD-----LGLPEQRWAICIPSGEGKSTLAA   | 887 |
| TR  | A0A1B4ZA62 | A0A1B4ZA62_9VIRU                                           | LELILTPAALGGVGISYNPSGLLSSVEGSTRE-----LQPIQAAILIPSGEGKTSLSR    | 920 |

\* : \*\*

|     |        |                                                              |                                                             |     |
|-----|--------|--------------------------------------------------------------|-------------------------------------------------------------|-----|
| lc1 | ORF1   | RYESLSHTIDFVTLDDVIYKVANITGLTEQCICKGNWDQYYALGRVYYTRYITGLKSSSV | 846                                                         |     |
| TR  | H6UNN2 | H6UNN2_9VIRU                                                 | QYP-----DLFIDHDTFVNDLILHPLRSEAFKSGDWKPVNAYLRNVIRIMIGDSG-SIL | 897 |
| TR  | H6UNN0 | H6UNN0_9VIRU                                                 | RHP-----TLFADHDSIVSAERLEGLRALAMETGDWSPTNAYLASCADLWAQAADVAEL | 921 |

|    |            |                  |                                                           |     |
|----|------------|------------------|-----------------------------------------------------------|-----|
| TR | A0A7G4WLZ5 | A0A7G4WLZ5_9VIRU | RYP-----DIFIDHDSLVSINLALRSKAVSSGNWEPLNAYLRAEGERYMS-----   | 846 |
| TR | A0A1P8DF89 | A0A1P8DF89_9VIRU | KYP-----DIFVDHDSLVSINLIALRSRAVSSGNWEPLNAYLRGEGERYMS-----  | 824 |
| TR | A0A514DCG4 | A0A514DCG4_9VIRU | KFP-----DTFYDHESAVDGTVLNALKQDAANTGDWNKLNRYLRNAVSET-----   | 827 |
| TR | A0A346P9C2 | A0A346P9C2_9VIRU | NYS-----IFIDHDSLIDQEFLDGLKEQAALTGSWNLVNRYLRRAEECE-----    | 930 |
| TR | A0A0A7DRW1 | A0A0A7DRW1_9VIRU | RYP-----SLFADHDDYATA-HIRHLVKEARETGQYDKLNLAWRNAPIP-----    | 957 |
| TR | A0A7L9R691 | A0A7L9R691_9VIRU | RYP-----SLFVDHDDYADL-HIKKLLTEAKETGQYDKLNSAWRDAPVP-----    | 957 |
| TR | A0A0S4GAY8 | A0A0S4GAY8_9VIRU | RYP-----DLFIDHDDCSTP-LHELKRRQALYTGQYDELNAAWRNVTYD-----    | 957 |
| TR | I1Y9U5     | I1Y9U5_9VIRU     | RYP-----ELFVDHDDYSTP-EHEIKRKQAVYTGQYDELNAAWRNITYD-----    | 957 |
| TR | A0A7G3W8V5 | A0A7G3W8V5_9VIRU | RYP-----ELFADHDDYSTP-ELEAKRRKAMYTQYDELNAAWRNVDYD-----     | 957 |
| TR | A0A0S4GA48 | A0A0S4GA48_9VIRU | RYP-----DLFVDHDDYSTL-EHEIKRKQAAVYTGQYDELNAAWRNIVYD-----   | 957 |
| TR | A0A7S5WLW9 | A0A7S5WLW9_9VIRU | RIGH----PDLVDHDSL-VGPAFEGRLARANITGDWKPVNAYLRDLT--R-----   | 878 |
| TR | A0A7S5WLW9 | A0A7S5WLW9_9VIRU | KLQK----Q-VAVDHDEL-VGPAFLALRDNASLTGDWKPVNRYLRDCA--R-----  | 815 |
| TR | A0A2Z5WAE4 | A0A2Z5WAE4_9VIRU | RYSG-----FAIDHDSLVDETIARPLREHANLTGDWKPVNKYLRHVANEFL-----  | 916 |
| TR | A0A7S5WLX4 | A0A7S5WLX4_9VIRU | KLKG----M-VALDHDEL-VGPAFLSLRERASSTGDWKPVNRYLRCA--R-----   | 923 |
| TR | A0A3G8GGF4 | A0A3G8GGF4_9VIRU | RYSG-----FAIDHDSLVDETIARPLREHANLTGDWKPVNKYLRHVADFL-----   | 916 |
| TR | A0A515KU26 | A0A515KU26_9VIRU | RIGH----PSVVIDHDSL-VGPAFEVVIKAKATLTGDWKPVNAYLRSLT--V----- | 878 |
| TR | A0A7S5WLW5 | A0A7S5WLW5_9VIRU | KLGR----L-VAVDHDEL-VGPAFLALRENASLTGDWKPVNRYLRDCA--R-----  | 689 |
| TR | A0A0M5KKP5 | A0A0M5KKP5_9VIRU | KLGH----Q-VAVDHDEL-VGPAFLALRECASTGDWKPVNKYLRDCA--R-----   | 689 |
| TR | A0A2Z1Q3S4 | A0A2Z1Q3S4_9VIRU | SHP-----EYFVDHDLISLTDLAILKADAVATGHWQKVNAYLRSVSP-----      | 965 |
| TR | A0A514D1L9 | A0A514D1L9_9VIRU | -----                                                     |     |
| TR | A0A2Z1Q375 | A0A2Z1Q375_9VIRU | LYP-----NLFVDHDDLISVPYFQELRANAVLTGTWKPVNNTYLRSLVPSR-----  | 968 |
| TR | D0TZ30     | D0TZ30_9VIRU     | KYP-----TLFIDHDSLGLP-QFHELLRVATMSGQWRALNSYLKSIVPE-----    | 930 |
| TR | A0A1B4ZA62 | A0A1B4ZA62_9VIRU | MYP-----EYFVDHDLISACDLEILRADAVSTGHWEKVNYSYLRSVTP-----     | 964 |

|     |            |                  |                                                               |   |      |
|-----|------------|------------------|---------------------------------------------------------------|---|------|
| lc1 | ORF1       | ---              | NSSRVIIASNHLAML-KNN--GFVLAYTSNTRTGDREFKQHAQNYLERLGSG----      | V | 895  |
| TR  | H6UNN2     | H6UNN2_9VIRU     | NGPFGPKVILTWGPDITPQNIT--GVALLLK--DLTGLRANVA--NRASILRSV----    | P | 946  |
| TR  | H6UNN0     | H6UNN0_9VIRU     | DGFSQRPILLTWGPDTPVKHFT--GYGLLLK--QLTGLRANKA--NRRSLMASG----    | C | 970  |
| TR  | A0A7G4WLZ5 | A0A7G4WLZ5_9VIRU | --VNRSKILLTWPSTAPKKSR--ICALLQ--QPVGRLANIA--NRSSIINDM----      | N | 893  |
| TR  | A0A1P8DF89 | A0A1P8DF89_9VIRU | --VNRGKILLTWPSTAPSRSR--ICALLQ--QPVGRLANIA--NRSSIMNDM----      | N | 871  |
| TR  | A0A514DCG4 | A0A514DCG4_9VIRU | --DLNRNVLLTWAIDTVPAFIK--SKIGMLK--DGTALRANIA--NRKAIRAS-----    |   | 873  |
| TR  | A0A346P9C2 | A0A346P9C2_9VIRU | DVMLGRRVLLTWSKDTAPVGSR--TYGFLT--RGTGLRANKA--NRATLTREF-----    |   | 978  |
| TR  | A0A0A7DRW1 | A0A0A7DRW1_9VIRU | ----TDKVLTLWHPSTVPHGME-VLAACILS--KGTGLRANTA--NRAALRQAVRNHLLS  |   | 1008 |
| TR  | A0A7L9R691 | A0A7L9R691_9VIRU | ----KHKVLTLWHPNTVPHGTE-ILAACMLS--KGIGLRANAA--NRAALRQAVANNLLS  |   | 1008 |
| TR  | A0A0S4GAY8 | A0A0S4GAY8_9VIRU | ----RTKILLTWHPTVPTGVK-VLAAAMLV--TGNGLRANKA--NRSALRQAVVNNLLG   |   | 1008 |
| TR  | I1Y9U5     | I1Y9U5_9VIRU     | ----KSKILLTWHPTVPTGVK-VLAAAMLV--TGTGLRANKA--NRTALRQAVQHLLA    |   | 1008 |
| TR  | A0A7G3W8V5 | A0A7G3W8V5_9VIRU | ----KSKILLTWHPTVPTGVK-VLTAAMLA--TGNGLRANKA--NRAALRQAVSQNLLS   |   | 1008 |
| TR  | A0A0S4GA48 | A0A0S4GA48_9VIRU | ----KSKILLTWHPTVPAGVK-VLAAAMLV--TGNGLRANKA--NRTALRQAVQNLLA    |   | 1008 |
| TR  | A0A7S5WLW9 | A0A7S5WLW9_9VIRU | --GLKDVLLTWGPDTHSVGRIGELISILLR--KPTSLRANQA--NRRSIVKA-----     |   | 925  |
| TR  | A0A7S5WLW9 | A0A7S5WLW9_9VIRU | --GVTGRLLLTWGPDTAPAEGRIGEYTIMLR--KPTALRANKA--NRAALLKN-----    |   | 862  |
| TR  | A0A2Z5WAE4 | A0A2Z5WAE4_9VIRU | VNAHVPMKMLLTWSRDTAPIGIR--CFAAVLE--OPTGIRANIA--NRASVQREF-----  |   | 964  |
| TR  | A0A7S5WLX4 | A0A7S5WLX4_9VIRU | --GIKGRVLLTWGPDTPAENRLGEYTVMLR--KPTALRANRA--NRAALLKS-----     |   | 970  |
| TR  | A0A3G8GGF4 | A0A3G8GGF4_9VIRU | VHAHTPMKMLLTWSRDTAPIGIR--CFAAVLE--LPTGIRANIA--NRASVQREF-----  |   | 964  |
| TR  | A0A515KU26 | A0A515KU26_9VIRU | --GLRDVLLTWGHETCDSDGRIGELISILLR--QPTSLRANKA--NRKAILKA-----    |   | 925  |
| TR  | A0A7S5WLW5 | A0A7S5WLW5_9VIRU | --GVTGRLLLTWGPDTAPAEGRIGEYTIMLR--KPTALRANRA--NRAALLKN-----    |   | 736  |
| TR  | A0A0M5KKP5 | A0A0M5KKP5_9VIRU | --GVTGRLLLTWGPDTAPAEGRIGEYTIMLR--KPTALRANRA--NRAALLKN-----    |   | 736  |
| TR  | A0A2Z1Q3S4 | A0A2Z1Q3S4_9VIRU | ----PGKVLTLWSPETVPHDSL-VIGAFMLT--KPSGLRANAA--NRKSLMLAVQKGSLS  |   | 1016 |
| TR  | A0A514D1L9 | A0A514D1L9_9VIRU | -----                                                         |   |      |
| TR  | A0A2Z1Q375 | A0A2Z1Q375_9VIRU | ----DRRILLTWSQQTVPHPNYR-VIAAFLLQ--QPSALRANIA--NRETILKTS-----  |   | 1013 |
| TR  | D0TZ30     | D0TZ30_9VIRU     | ----DPRILLTWGPATIPSSRG--ILGAFLLA--RPSGIRANTA--NRKSIQDLATQGGLS |   | 981  |
| TR  | A0A1B4ZA62 | A0A1B4ZA62_9VIRU | ----VGKVLTLWAPETVPPGCE-VLGAFMLT--KPSGLRANAA--NRKSLVLAVNNGSIP  |   | 1015 |

|     |            |                  |                                         |                                 |      |
|-----|------------|------------------|-----------------------------------------|---------------------------------|------|
| lc1 | ORF1       | ---              | I-RVTNXXRKLVSLLHLEISSVAP-----           | HPIGVIYP-YNTNPKPLPLYQAPRIQAKE   | 944  |
| TR  | H6UNN2     | H6UNN2_9VIRU     | KQSIHYKYNFAERNSAAVALCGPTG-----          | EEVRVSYM-KFEAPSVPPRYAIFKGVDAAG  | 999  |
| TR  | H6UNN0     | H6UNN0_9VIRU     | P--YREFSTWYKRDAFALACVGGSA-----          | TRATISYS-YESKIPLPVMQYPTHEAGQ    | 1021 |
| TR  | A0A7G4WLZ5 | A0A7G4WLZ5_9VIRU | KKYIHMFKNYSERDAYLMSITAGLT-----          | G---LTYKVYQRTGDAIPKFNWPRVDSKD   | 944  |
| TR  | A0A1P8DF89 | A0A1P8DF89_9VIRU | KKYVHMFKNYSERDAYLMSITAGLT-----          | G---LTYKVYQRTGDAIPKFNWPRVDSKD   | 922  |
| TR  | A0A514DCG4 | A0A514DCG4_9VIRU | SMKVIEVDNHLQLQEQAFLAIEM-----            | SNVADVLHLR-KYVADTAPPVYKWPTVPATQ | 927  |
| TR  | A0A346P9C2 | A0A346P9C2_9VIRU | GNKLSIQNFSELHANVIMLYCRL-----            | LTANSWEVR-VFESSMPKPEYIKPKIDTVT  | 1031 |
| TR  | A0A0A7DRW1 | A0A0A7DRW1_9VIRU | KEKLKTFNSMAGLLAYATQATIERVDIVRSRTFAMVSND | -DHNKIGSLPMLNVPAGASS            | 1067 |
| TR  | A0A7L9R691 | A0A7L9R691_9VIRU | KEKLKTFNTMGALLAYVTQTAIERIDVRSRTFAMVSND  | -DHSKIGSLPMLNITPVGASS           | 1067 |
| TR  | A0A0S4GAY8 | A0A0S4GAY8_9VIRU | KKALRLYPNSRMFAELTQLAIEQVDIVRSRTFAMVSKQ  | -NPNEVGTLPLMLRIEIPVGATS         | 1067 |
| TR  | I1Y9U5     | I1Y9U5_9VIRU     | KKALRVYPNSRMFAELTQLAIEQVDIVRSRTFAMVSKQ  | -NHNDIGSLPMLRIEIPIGATS          | 1067 |
| TR  | A0A7G3W8V5 | A0A7G3W8V5_9VIRU | KKALKIYPNNRMFAEITQLAIEQVIDIIRSRTFAMVNKQ | -NFNEIGTLPLMKIEIPVGATS          | 1067 |
| TR  | A0A0S4GA48 | A0A0S4GA48_9VIRU | KKALRVYPNSRMFAEITQLAIEQVDIVRSRTFAMVSNQ  | -NHNDIGSLPMLRIEIPIGATS          | 1067 |
| TR  | A0A7S5WLW9 | A0A7S5WLW9_9VIRU | GRNLEFSDSYSHTLAKVITVILKMRR-VIENGREKVTIR | -EFVSTRHPPQFTYPRVAASS           | 983  |
| TR  | A0A7S5WLW9 | A0A7S5WLW9_9VIRU | KRNLRLCDNWAQMFASVIDIVLTHGR-LEAATETQLKIQ | -VFESHKPKPKFMYPRIAATD           | 920  |
| TR  | A0A2Z5WAE4 | A0A2Z5WAE4_9VIRU | GKNVARFKSTQGISYAAKLYLQY-----            | MSTNTYSVD-VFESTSQLPQYKLPKPATA   | 1017 |
| TR  | A0A7S5WLX4 | A0A7S5WLX4_9VIRU | KRNLRLCDNWAQMFACVVDIMLTHGR-LETPKETQLKVR | -IFESEYKPKPKFMYPRVAATD          | 1028 |
| TR  | A0A3G8GGF4 | A0A3G8GGF4_9VIRU | GKNAARFKSTQGISYAAKLYLQY-----            | MSTNTYSVD-VFESTSQLPQYKLPKPATA   | 1017 |
| TR  | A0A515KU26 | A0A515KU26_9VIRU | KRNIEFSDSYTHSLAKVMACVLKLN-RVTENGKELIKVR | -EFSSTKNTPTQFTYPRVAASA          | 983  |



|    |            |                  |                                                                |      |
|----|------------|------------------|----------------------------------------------------------------|------|
| TR | A0A7S5WLW5 | A0A7S5WLW5_9VIRU | KRNLRLCDNWAQMFTSVIDIVLTHGR-LEAATETQMKIR-VFESEHKPKPFMYPRIAATD   | 794  |
| TR | A0A0M5KKP5 | A0A0M5KKP5_9VIRU | KRNLRLCDNWAQMFASVIDIVLTHGR-LEAATETQMKIR-VFESEHKPKPFMYPRIAATD   | 794  |
| TR | A0A2Z1Q3S4 | A0A2Z1Q3S4_9VIRU | RKVFKLCPNHGVLVKNALHCLSAY-AVQGGVVRTSF-VN-EDNVVKPLPRLQLPSLGAHK   | 1073 |
| TR | A0A514D1L9 | A0A514D1L9_9VIRU | -----                                                          |      |
| TR | A0A2Z1Q375 | A0A2Z1Q375_9VIRU | RRIVTFFPPTHQRLEIAAVNLANALTR----TSHTSTVIN-TRGALTTPPPTLTLRINDTRG | 1068 |
| TR | D0TZ30     | D0TZ30_9VIRU     | KDKLIIAQNHQORDRAILKLATQLLK-PGSKLRKRFDVK-DTGEVMRAPFFQFPRLPASE   | 1039 |
| TR | A0A1B4ZA62 | A0A1B4ZA62_9VIRU | KKKFQMCATHGILTQKALHTLSAY-LIQGGIIRTSF-VD-ANDVVKPLPRLKPLTLGAHK   | 1072 |

|     |            |                  |                                                               |      |
|-----|------------|------------------|---------------------------------------------------------------|------|
| 1c1 | ORF1       |                  | TIKSSKAQIPDIGVLYRFNVTR-IGPLYDDIAKSTLTGGWPKAAMNESLAEYGRALVEWE  | 1003 |
| TR  | H6UNN2     | H6UNN2_9VIRU     | ILRNTKTTLADYAVLNKYGVTE-TVALDREVVESSLGSAWPKQLMTDSLADYGRQLARWE  | 1058 |
| TR  | H6UNN0     | H6UNN0_9VIRU     | IIRRSKTVIPDFEKLTLSGVES-LTPVYADLLQSSFSGAWPKTELYDAIANYAGAMHEWQ  | 1080 |
| TR  | A0A7G4WLZ5 | A0A7G4WLZ5_9VIRU | LLRRSKTVIKDHATLYRHNLSM-DVSITDAIAQSALSAGAWPKDALYKSIADHARQLAEWA | 1003 |
| TR  | A0A1P8DF89 | A0A1P8DF89_9VIRU | LLHRSKTVIKDHATLHRHNLM-DVSITDAIAQSALSAGAWPKDALYKSIADHARQLAEWA  | 981  |
| TR  | A0A514DCG4 | A0A514DCG4_9VIRU | MLRMNKTTHINDYDLRKFAASKYSSVDNAAVESGLIGGYKVTENNSIAKYAERLDKWQ    | 987  |
| TR  | A0A346P9C2 | A0A346P9C2_9VIRU | LAKNSKLSVGDFDTLRRFNVPI-NRAVYDEIGHLSALSGGYPKNQLNESLAQYASNIDKWW | 1090 |
| TR  | A0A0A7DRW1 | A0A0A7DRW1_9VIRU | ILRAAKTHVVDYDLSRRFGVSDKTQVVDTALLKSALTAAYPSTVISNALATLGKDLHEYL  | 1127 |
| TR  | A0A7L9R691 | A0A7L9R691_9VIRU | ILRAAKTHVVDYDLSRRFGVSDKTQVVDTALLKSALTAAYPSTVISNALATLGKDLHEYL  | 1127 |
| TR  | A0A0S4GAY8 | A0A0S4GAY8_9VIRU | ILRAAKTHVVDYESLRFGVSGKTHIVDTALLKSALTAAYPASTISNALAKLGEDLHDYL   | 1127 |
| TR  | I1Y9U5     | I1Y9U5_9VIRU     | ILRAAKTHVVDYESMRFGVSGKTHIVDTALLKSALTAAYPASTISNALAKLGEDLHNYL   | 1127 |
| TR  | A0A7G3W8V5 | A0A7G3W8V5_9VIRU | ILRAAKTHVVDYESLRFGVSGKTHIVDTALLKSALTAAYPASTISNALAKLGEDLHDYL   | 1127 |
| TR  | A0A0S4GA48 | A0A0S4GA48_9VIRU | ILRAAKTHVVDYESMRFGVSGKTHIVDTALLKSALTAAYPASTISNALAKLGEDLHHYL   | 1127 |
| TR  | A0A7S5WLW9 | A0A7S5WLW9_9VIRU | ILRRAKTHLCDYEAARHFVAD-TGFIDEAALESALTGAYPKNPLYDSIARYAKDLQEW    | 1042 |
| TR  | A0A7S5WLW9 | A0A7S5WLW9_9VIRU | ILRRAKTHLADYDAVRSFGIPE-TGFVDDAALESALTAAYPKDPLYQAIADYARRDLWQ   | 979  |
| TR  | A0A2Z5WAE4 | A0A2Z5WAE4_9VIRU | ILRKAKTHVIDYDTLNRVGIQV-VSSIDDALLESASVSGAVPKRLLSQALADYAKALDSWQ | 1076 |
| TR  | A0A7S5WLX4 | A0A7S5WLX4_9VIRU | ILRRAKTHLADYDAVRSFGIAE-TSFIDEAALESALTAAYPKDPLYQAIADYAKKLDKWQ  | 1087 |
| TR  | A0A3G8GGF4 | A0A3G8GGF4_9VIRU | ILRKAKTHVIDYDTLNRVGIQV-VSSIDDALLESASVSGAVPKRLLSQALADYAKALDGWQ | 1076 |
| TR  | A0A515KU26 | A0A515KU26_9VIRU | ILRRARTHLSDYEAARKFVAD-TAFIDEAALESALTGAFFPKDPLYQAIADYARRDLWV   | 1042 |
| TR  | A0A7S5WLW5 | A0A7S5WLW5_9VIRU | ILRRAKTHLADYDAVRSFGIPE-TGFVDDAALESALTAAYPKDPLYQAIADYARRDLWQ   | 853  |
| TR  | A0A0M5KKP5 | A0A0M5KKP5_9VIRU | ILRRAKTHLADYDAVRSFGIPE-TDFVDDAALESALTAAYPKDPLYQAIADYARRDLWQ   | 853  |
| TR  | A0A2Z1Q3S4 | A0A2Z1Q3S4_9VIRU | ILRRSKTKVVDYQTMKAFGVESKIPDLDESLLSSGLTAALPARTVSDAARQAKALDVHL   | 1133 |
| TR  | A0A514D1L9 | A0A514D1L9_9VIRU | -----                                                         |      |
| TR  | A0A2Z1Q375 | A0A2Z1Q375_9VIRU | TLKRARVHLSDDNALNRLGLTS-QVDLSRDVLDGVMSSGGYKPKLLRKAVDAYANDLLKWT | 1127 |
| TR  | D0TZ30     | D0TZ30_9VIRU     | VMRRAKVQVVDYQSLHLYGAGSKIDQLDQSLTSGLTGALPKSLLSNALAKQAKELQHYL   | 1099 |
| TR  | A0A1B4ZA62 | A0A1B4ZA62_9VIRU | ILRRARTKVVDYQTMKAFGVESKIPDLDESLLSSGLTAALPARTVSDAARQAKALDVHL   | 1132 |

|     |            |                  |                                                                |      |
|-----|------------|------------------|----------------------------------------------------------------|------|
| 1c1 | ORF1       |                  | KQTAIEYRFELLRNLPISIT-RVKRY-IENCLPEYLGSLGA----SSHGLPIFLRTVQGY   | 1057 |
| TR  | H6UNN2     | H6UNN2_9VIRU     | KSCHFETSEMLITRVYVHY-KLEAY-VRHLVRFHLGIK---STSEGGGRPILENNKIGYP   | 1113 |
| TR  | H6UNN0     | H6UNN0_9VIRU     | TTGTWRAKTITIDGLPTLS-ALRPF-VTHQVVTSLGLA---AINSRATPLFNKNKVGYP    | 1135 |
| TR  | A0A7G4WLZ5 | A0A7G4WLZ5_9VIRU | RKSSFYEYKI IAPLKLCDN-KFISE-AVSTSMYVLGLSGSLDHSNTGGGLTFILNDLLRP  | 1061 |
| TR  | A0A1P8DF89 | A0A1P8DF89_9VIRU | RKSSFYEYKI IAPLKLCDN-EFVAE-AVSTSMYVLGLSGSLNHSNAGGGLTFVILNDLLRP | 1039 |
| TR  | A0A514DCG4 | A0A514DCG4_9VIRU | KTGRFEQIATVKIPLFASLSDPLQDLIDMRIRFHLGIVGSAKVHVVGPTGSLIRNQEY     | 1047 |
| TR  | A0A346P9C2 | A0A346P9C2_9VIRU | NAGHWEVKYLYARPLFTLAQ-VKAQV-DEIISVNLAIYLVGRK--HRTEDAFELNKDGH    | 1146 |
| TR  | A0A0A7DRW1 | A0A0A7DRW1_9VIRU | RTHKIMPIRVAPLK-ISTT-GAFQQL-KLSYSRTITQL-----HTSTGG              | 1168 |
| TR  | A0A7L9R691 | A0A7L9R691_9VIRU | RSHKIRPIRVAPLK-ISTV-NVLQQL-KLAYSRTIVHL-----HTSGGG              | 1168 |
| TR  | A0A0S4GAY8 | A0A0S4GAY8_9VIRU | ETHTRIPRIAPVD-PKAK-TAFPLL-RQAYLRTLENY-----TATTPG               | 1168 |
| TR  | I1Y9U5     | I1Y9U5_9VIRU     | ETHTIKPIRMAPVD-PRAK-TAFPLL-RQAYLRTLENY-----TALASG              | 1168 |
| TR  | A0A7G3W8V5 | A0A7G3W8V5_9VIRU | QTHTIKPIRVAPVD-PKAK-SAFPLL-RQAYLRTLENY-----TAANPG              | 1168 |
| TR  | A0A0S4GA48 | A0A0S4GA48_9VIRU | QAHSIKPIRMAPVD-PKAK-TAFPLL-RQAYLRTLENY-----TALAPG              | 1168 |
| TR  | A0A7S5WLW9 | A0A7S5WLW9_9VIRU | KGGKYLTKNILIPSGDVS---FSLHSVATFLNSLAIRPGGS---FNGRDLITNLGDYP     | 1095 |
| TR  | A0A7S5WLW9 | A0A7S5WLW9_9VIRU | KTGCFKQRAVSIKPDYDNE---IGRSIYQFLNALGIIPGGS---INYQSLSLNVEGY      | 1032 |
| TR  | A0A2Z5WAE4 | A0A2Z5WAE4_9VIRU | KAGHYTEKI IHVSGNLRLTQPIRTYV-ENVIHDNLALTDATGH---VQTSSKFRNLNSHNP | 1133 |
| TR  | A0A7S5WLX4 | A0A7S5WLX4_9VIRU | RTGRFVERTVNVKPDNYDE---LGRVLVIYQFLNALGIVPGGS---INYSSLSLNVEGY    | 1140 |
| TR  | A0A3G8GGF4 | A0A3G8GGF4_9VIRU | KAGHYTEKI IHVSGNLRLTQPIRAYI-ECVIHDNLALTDATGY--VQTSSKFRNLNSHNP  | 1133 |
| TR  | A0A515KU26 | A0A515KU26_9VIRU | QAGRYIEKVIPIQDDYQL---FARLSVATFLTALSIPGGS---FNGKDLIKNEDGY       | 1095 |
| TR  | A0A7S5WLW5 | A0A7S5WLW5_9VIRU | KAGCFRQRAVGIPKDNIDE---IGRSIYQLLHALGIIPGGS---INYQSLSLNVEGY      | 906  |
| TR  | A0A0M5KKP5 | A0A0M5KKP5_9VIRU | KTGCFRQKTVSIPKDDYDQ---IGRSIYQLLHALGIMPGRS---INYQSLSLNIEGY      | 906  |
| TR  | A0A2Z1Q3S4 | A0A2Z1Q3S4_9VIRU | AGLRKVYVKTTLPIELHST-ELVTLM-RKLLHSLIHGAP-----NSAGDSNLKPYA       | 1182 |
| TR  | A0A514D1L9 | A0A514D1L9_9VIRU | -----                                                          |      |
| TR  | A0A2Z1Q375 | A0A2Z1Q375_9VIRU | ATVRDVSFTVTLPHTYDQTV---TNAERIFFRSIGANVVK--PLSQTTIFRRNREGYP     | 1182 |
| TR  | D0TZ30     | D0TZ30_9VIRU     | NQGTFSYVPPTLDDFHPQ-ASIKAI-AQQVRDQLRDY-----FAGVTA               | 1141 |
| TR  | A0A1B4ZA62 | A0A1B4ZA62_9VIRU | ATLRKVYVKTTLPIEIKTQ-DIVMLM-RKTLNSLIHGTP-----NSERGSNLHPYE       | 1181 |

|     |            |                  |                                                               |      |
|-----|------------|------------------|---------------------------------------------------------------|------|
| 1c1 | ORF1       |                  | NCQKVKNHYAANSALMRPLGLSVEKALNLLIEHAPGN-----TMLQKTISVLK-----    | 1105 |
| TR  | H6UNN2     | H6UNN2_9VIRU     | AAIPVKHHFNAIPSLVAFALT'NVVSFMLLLDHALKQLPNNHKSNAALRKLLVDFTT-P   | 1172 |
| TR  | H6UNN0     | H6UNN0_9VIRU     | AAVPVRHHYNGKPAALLRPLGLTVGVSLTLLFDPKLLRRRTPGSRSLRMYEIVIGDAVK-- | 1193 |
| TR  | A0A7G4WLZ5 | A0A7G4WLZ5_9VIRU | ATKRLKHHYNIPTLRLCLGCSVNASTQYLIKCSDG-----HNLEKILSLMA-RER-S     | 1113 |
| TR  | A0A1P8DF89 | A0A1P8DF89_9VIRU | ATKRLKHHYNIPTLRLCLGCSVNASTQYLIKCSNG-----DNLEKILSLMA-SER-S     | 1091 |
| TR  | A0A514DCG4 | A0A514DCG4_9VIRU | DIKPLVHNYGCVIRIVPTLGLSLNQSFRCLLDAVT--PRGDMPGRIGRLLRVIDIAL---  | 1102 |
| TR  | A0A346P9C2 | A0A346P9C2_9VIRU | AIHEVKHHYSSITRLMRPIGASTQVTIKTIIDGQL--PT-RYTGDLGRLYTTLFRTTR--S | 1201 |

|    |            |                  |                                                               |       |
|----|------------|------------------|---------------------------------------------------------------|-------|
| TR | A0A0A7DRW1 | A0A0A7DRW1_9VIRU | FIPAPRHSYNSLVGLMRPAGFSNGAALALAIAPK--PS-KAPGKLGKLFSLFLDIATA-H  | 1224  |
| TR | A0A7L9R691 | A0A7L9R691_9VIRU | FVPAPRHSYNSLVGLMRPAGFSNGAALALAIAPK--PS-KAPGKLGKLFSLFLDIATA-H  | 1224  |
| TR | A0A0S4GAY8 | A0A0S4GAY8_9VIRU | YVAAPRHSYNSIVGLMRPTGFSNGAALALAIAPK--PS-GAPGKLGKLFSLFLHIALA-Q  | 1224  |
| TR | I1Y9U5     | I1Y9U5_9VIRU     | YVPAPRHSYNSIVGLMRPTGFSNGAALALAIAPK--PS-GAPGKLGKLFSLFLHIALA-R  | 1224  |
| TR | A0A7G3W8V5 | A0A7G3W8V5_9VIRU | FVAAPRHSYNSIVGLMRPTGFSNGAALALAIAPK--PT-GAPGKLGKLFSLFLNIALA-R  | 1224  |
| TR | A0A0S4GA48 | A0A0S4GA48_9VIRU | YVPAPRHSYNSIVGLMRPTGFSNGAALALAVSAPT--PS-GAPGKLGKLFSLFLHIALA-R | 1224  |
| TR | A0A7S5WLW9 | A0A7S5WLW9_9VIRU | QVTHMRHFYNCIDRVTAAGCSMGLVVRRLLISKQN--AT-KYSGSLGKMYTFLEILK--R  | 1150  |
| TR | A0A7S5WLW9 | A0A7S5WLW9_9VIRU | ITSRLTHFYNCIDRITALSGCSLGLVVRRLLIDKQD--TT-KYSGNLGKLYSFLVILG--Q | 1087  |
| TR | A0A2Z5WAE4 | A0A2Z5WAE4_9VIRU | DTHEITHYGYFLTSLNTFNLTSTNAGLNLLDEMT--PL-RYSGRIGKLYRLYKLQR--P   | 1188  |
| TR | A0A7S5WLX4 | A0A7S5WLX4_9VIRU | ITERLTHFYNCIDRITALSGCSLGLVVRRLLIDKQD--TT-KYSGNLGKLYSFLVILE--Q | 1195  |
| TR | A0A3G8GGF4 | A0A3G8GGF4_9VIRU | DTHEITHYGYFLTSLNTFNLTSTNAGLNLLDEMA--PL-RYSGRIGKLYRLYKLQR--P   | 1188  |
| TR | A0A515KU26 | A0A515KU26_9VIRU | VIGHMRHFYNCVDRLTPAGCSMGLVVRRLLISKQT--PI-KYAGALGKIYNFLENLK--R  | 1150  |
| TR | A0A7S5WLW5 | A0A7S5WLW5_9VIRU | ITSRLTHFYNCIDRITALSGCSLGLVVRRLLIDKQD--TT-KYSGNLGKLYSFLVILG--Q | 961   |
| TR | A0A0M5KKP5 | A0A0M5KKP5_9VIRU | ITSRLTHFYNCIDRITALSGCSLGLVVRRLLIEKQD--TT-KYSGNLGKLYSFLVILG--Q | 961   |
| TR | A0A2Z1Q3S4 | A0A2Z1Q3S4_9VIRU | PVLHPTHYHGATPSLIRPLGFSNGKALALTIDGQRANLT-AVPGRLGKLLTLLKRASR-L  | 1240  |
| TR | A0A514D1L9 | A0A514D1L9_9VIRU | -----                                                         | ----- |
| TR | A0A2Z1Q375 | A0A2Z1Q375_9VIRU | MTSRIVHYYSCLERLILPSGFSIGAGVRKSIQCMPT--SIGPYPLSTKIILFCQKLLSLVD | 1240  |
| TR | D0TZ30     | D0TZ30_9VIRU     | RVAAPGHNYNSMIALQLPLGSDGAGLQLAITSQK--PV-KYAGKLGQLWSVFHIAAMK-P  | 1197  |
| TR | A0A1B4ZA62 | A0A1B4ZA62_9VIRU | PVLHPTHYHGSIPSLIRPLAFSNGKALALAIIDGQSVNLT-DVPGRMGNLLTLLKRANR-F | 1239  |

|     |            |                                                          |                                                               |       |
|-----|------------|----------------------------------------------------------|---------------------------------------------------------------|-------|
| 1c1 | ORF1       | -----HPSLGSKAQNMLITKLTFLKESYN-----STPEAQRALFYQYFTGDWSLVP | 1150                                                          |       |
| TR  | H6UNN2     | H6UNN2_9VIRU                                             | -----HQLTKRRASPVQDHLNWITRFD-----SNDDVQLFAYRWFKGDFFLLP         | 1217  |
| TR  | H6UNN0     | H6UNN0_9VIRU                                             | -----QARHQGSSKAILRDYQAWLSGYLG-----APEHEQEFVARWLTADLSLLP       | 1238  |
| TR  | A0A7G4WLZ5 | A0A7G4WLZ5_9VIRU                                         | -----FARSKQRATKQFDEVIEFINRLGLLKQEPPLAFNKVSPSLAEAWFTGSLQLLP    | 1167  |
| TR  | A0A1P8DF89 | A0A1P8DF89_9VIRU                                         | -----FSHSHQRATKQFDEVIEFIDRLGLLKQEPPLAFGKVVSPSLAEAWFTGGLQLLP   | 1145  |
| TR  | A0A514DCG4 | A0A514DCG4_9VIRU                                         | GSVSEASIDVTTQNRKTLRAVRDFILRAEPIYVRGSD----ANRVNNIFDYCDGNLSLFP  | 1157  |
| TR  | A0A346P9C2 | A0A346P9C2_9VIRU                                         | QFLRQETASIGVGVDSSTITEMRDFIDAV--MGSEDKTT-RSLGLPSNLFKYIQGDLQLIP | 1258  |
| TR  | A0A0A7DRW1 | A0A0A7DRW1_9VIRU                                         | GKTADASA-----SAALLKYAHEVHAFYVYSTK-----SEEAESLYQYLSGNVSFFP     | 1272  |
| TR  | A0A7L9R691 | A0A7L9R691_9VIRU                                         | GKTADAST-----SAALLKYSQEVHAFYALSSK-----SEGAADSLFYQYLSGNVSFFP   | 1272  |
| TR  | A0A0S4GAY8 | A0A0S4GAY8_9VIRU                                         | GKVSDDAA-----SDSVGKYSQEVRRILYALAQ-----SPSADNLFYDLSGNVSFFP     | 1272  |
| TR  | I1Y9U5     | I1Y9U5_9VIRU                                             | GKVSDDAA-----SDSVGKYSQEVRRILYALAKN-----SPNADNLYDLSGNVSFFP     | 1272  |
| TR  | A0A7G3W8V5 | A0A7G3W8V5_9VIRU                                         | GKVSDDAA-----SDSIGKYSQEVRRILYSLAQD-----SPNADNLYNLSGNVSFFP     | 1272  |
| TR  | A0A0S4GA48 | A0A0S4GA48_9VIRU                                         | GKVSDDAA-----SDSVGKYSQEVRRILYALAKD-----SPNADNLYDLSGNVSFFP     | 1272  |
| TR  | A0A7S5WLW9 | A0A7S5WLW9_9VIRU                                         | RRDSATSLQNSYKEVDTLSDIIDFIDRAMS-HSR-D-----EKNARQVYEYISGTLSPFI  | 1203  |
| TR  | A0A7S5WLW9 | A0A7S5WLW9_9VIRU                                         | RKESLANLSLSYKETDTINDIRGFIIDSTMA-NQNSD-----SDIGNRVFEYIVGQSRLLP | 1141  |
| TR  | A0A2Z5WAE4 | A0A2Z5WAE4_9VIRU                                         | NAVETRHNRY-----QFNRLSEFFFEYAAQFSEKSQLL-AYATFSANFDKYIDSSLSLIP  | 1241  |
| TR  | A0A7S5WLX4 | A0A7S5WLX4_9VIRU                                         | RKESLANLSLSYKETDTIKDIRLFIIDSTMA-NQNSD-----SDIGNRVFEYIVGQSRLLP | 1249  |
| TR  | A0A3G8GGF4 | A0A3G8GGF4_9VIRU                                         | NAVETRHNRY-----QFNRLSEFFFEYAAQFSEKNRLL-AYATFSANFDKYIDSSLSLIP  | 1241  |
| TR  | A0A515KU26 | A0A515KU26_9VIRU                                         | RRDSATSLQNSYKEVDTLSDIQFIDRAMA-TGG-D-----REAAHQVYISITGTLSPFI   | 1203  |
| TR  | A0A7S5WLW5 | A0A7S5WLW5_9VIRU                                         | RKESLANLSLSYKETDTINDIRDFIIDSTMA-NQNSD-----SDIGNRVFEYIVGQSRLLP | 1015  |
| TR  | A0A0M5KKP5 | A0A0M5KKP5_9VIRU                                         | RKESLANLSLSYKETDTINDIRDFIIDSTMA-NQNSD-----SDIGNRVFEYIVGQSRLLP | 1015  |
| TR  | A0A2Z1Q3S4 | A0A2Z1Q3S4_9VIRU                                         | VRKGDGNA-----ASTVLRFEFGLRSTLAVIGT-----NSESISNLMAYVEGTFFNLYP   | 1288  |
| TR  | A0A514D1L9 | A0A514D1L9_9VIRU                                         | -----                                                         | ----- |
| TR  | A0A2Z1Q375 | A0A2Z1Q375_9VIRU                                         | EKDRQVQIMNKKGQLNPLFKVSHTQSMQA-----A-LPPSCDEFIMNYITGDLQFIP     | 1292  |
| TR  | D0TZ30     | D0TZ30_9VIRU                                             | RLVP-AQ-----ALRIDAYAAATLQRFQCNVNPA-----TNEVHALIYQYLSGDLNLYP   | 1244  |
| TR  | A0A1B4ZA62 | A0A1B4ZA62_9VIRU                                         | LRRGDGKA-----AGTIHRFEAFLRNLSLTGL-----DSTSTKNLADYVEGTFLNLYP    | 1287  |

|     |            |                                                              |                                                               |       |
|-----|------------|--------------------------------------------------------------|---------------------------------------------------------------|-------|
| 1c1 | ORF1       | PAAS-QWSSDFTTLIRDLTLAGLEGDHFTPFMSQHALTLQPVTRALHIHYIEKIVFNATI | 1209                                                          |       |
| TR  | H6UNN2     | H6UNN2_9VIRU                                                 | PHAT-QYSSDFTTLARDITLVVVECAV-RGELFRHLAGMPSIKAFTIKVLELVDVTNLIQ  | 1275  |
| TR  | H6UNN0     | H6UNN0_9VIRU                                                 | PSNT-DSADLVTFIRDITCYTEVKLD-DGLLLRTMSRYDAQHAACFFMLTERAINHLVL   | 1296  |
| TR  | A0A7G4WLZ5 | A0A7G4WLZ5_9VIRU                                             | PATC-HQSADLSTFVRDITLNVIEHIF-LAYLNS---TNDLQQIVVTIHHYERMAQYAIN  | 1222  |
| TR  | A0A1P8DF89 | A0A1P8DF89_9VIRU                                             | PAIC-HQSADLSTFVRDITLNVIEHIF-LARLNR---TNDLQQIVVTIHHYERMAQYAIN  | 1200  |
| TR  | A0A514DCG4 | A0A514DCG4_9VIRU                                             | PSNP-GLSIEVISFIRDVTLVLVLENSH---EFQELFDSDKVQIACYVRQLERIVLQRFV  | 1212  |
| TR  | A0A346P9C2 | A0A346P9C2_9VIRU                                             | PVNP-GVSAELISFIRASALMCLEANT---PQLRQWLSIDINVSCLIAFRTYEHTMLMLL  | 1314  |
| TR  | A0A0A7DRW1 | A0A0A7DRW1_9VIRU                                             | PAGG--FPAEMLALARDLALQHIETSH---TTLLS---GPAEHLRTACAAIESLAILAIV  | 1324  |
| TR  | A0A7L9R691 | A0A7L9R691_9VIRU                                             | PSGG--FPAEMLALARDLTLQHIETAH---PTLLS---GPAEHLRTACAAIESLAILAIV  | 1324  |
| TR  | A0A0S4GAY8 | A0A0S4GAY8_9VIRU                                             | PKGG--YPAEMLALARDLALQHIETAKQ---PALLT---GPAEQLRSVCSVLDSLAILAIV | 1324  |
| TR  | I1Y9U5     | I1Y9U5_9VIRU                                                 | PKGG--YPAEMLALARDLALQHIETNQ---PALLT---GPAEQLRSVCSVLDSLAILAIV  | 1324  |
| TR  | A0A7G3W8V5 | A0A7G3W8V5_9VIRU                                             | PKGG--YPAEMLALARDLALQHIETSTQ---PTLLT---GPAEQLRSVCSVLDSLAILAIV | 1324  |
| TR  | A0A0S4GA48 | A0A0S4GA48_9VIRU                                             | PKGG--YPAEMLALARDLALQHIETHQ---PALLT---GPAEQLRSVCSVLDSLAILAIV  | 1324  |
| TR  | A0A7S5WLW9 | A0A7S5WLW9_9VIRU                                             | PFNC-GISTDIISGLRAASLVLENHIF---LSRITLPA--QELAVWFSRCEYQTSIFFM   | 1256  |
| TR  | A0A7S5WLW9 | A0A7S5WLW9_9VIRU                                             | PYPN-GVNAEIIAISIRASVLVVIENHY---KYRITLEP--IVFALWQRFVEFALVFFF   | 1194  |
| TR  | A0A2Z5WAE4 | A0A2Z5WAE4_9VIRU                                             | PLND-DTSVEFVSFCRSATLRYFESNS---ERFFDLLTRQPNELTVTFWVVEQHLISQVIR | 1297  |
| TR  | A0A7S5WLX4 | A0A7S5WLX4_9VIRU                                             | PYPN-GVNAEIIAISIRASVLVVIENHY---KYRITLEP--IVFALWQRFIEFAALIFFF  | 1302  |
| TR  | A0A3G8GGF4 | A0A3G8GGF4_9VIRU                                             | PLND-DTSVEFVSFCRSATLRYFESDS---ERFFDLLTRQPSSETVTFWVVEQHLISQVIR | 1297  |
| TR  | A0A515KU26 | A0A515KU26_9VIRU                                             | PFNC-GISTDIISGLRAALVVFEDHF---LARVTLPA--QELAVWFSQGEYHTLSFFI    | 1256  |
| TR  | A0A7S5WLW5 | A0A7S5WLW5_9VIRU                                             | PYPN-GINAEIIAISIRASVLVVIENHY---KYRITLEP--IVFALWQRFVEFALVFFF   | 1068  |
| TR  | A0A0M5KKP5 | A0A0M5KKP5_9VIRU                                             | PYPN-GVNAEIIAISAVRASVLVVIENHY---KHRTITLEP--IVFALWQRFVEFALVFFF | 1068  |
| TR  | A0A2Z1Q3S4 | A0A2Z1Q3S4_9VIRU                                             | PQNM-TVPAELVSLERDLALSIFEMHY---LNTLT---LDPPLIRELISVLDTAHHLAVV  | 1341  |
| TR  | A0A514D1L9 | A0A514D1L9_9VIRU                                             | -----                                                         | ----- |

|                                |                                                               |      |
|--------------------------------|---------------------------------------------------------------|------|
| TR A0A2Z1Q375 A0A2Z1Q375_9VIRU | PANRRNHSSDFISLLRDVTLAIESDP---ILMRKLALANNRDRVYTIYQLEDMVALNLE   | 1349 |
| TR D0TZ30 D0TZ30_9VIRU         | PSAS-HLSSELASVTRDLALMTFEARH---LDTFV---RGADYLRRELISALDTCAQLALC | 1297 |
| TR A0A1B4ZA62 A0A1B4ZA62_9VIRU | PQNM-TVPAELVSLERDLALAHFEEHY---IPVLK---FEAPLVRELISVLDAAAHLAGV  | 1340 |

|                                |                |      |
|--------------------------------|----------------|------|
| lc1 ORF1                       | STLHRYFPGIILQD | 1223 |
| TR H6UNN2 H6UNN2_9VIRU         | MMLHEIIPGITLKD | 1289 |
| TR H6UNN0 H6UNN0_9VIRU         | ETIQTYYPGVSLKD | 1310 |
| TR A0A7G4WLZ5 A0A7G4WLZ5_9VIRU | KVLHGLIPGIIMQD | 1236 |
| TR A0A1P8DF89 A0A1P8DF89_9VIRU | KVLNGLIPGIIMQD | 1214 |
| TR A0A514DCG4 A0A514DCG4_9VIRU | KIIDTQFYGLILHD | 1226 |
| TR A0A346P9C2 A0A346P9C2_9VIRU | RALSVNYPGINFKD | 1328 |
| TR A0A0A7DRW1 A0A0A7DRW1_9VIRU | STLQERLPGFIIRD | 1338 |
| TR A0A7L9R691 A0A7L9R691_9VIRU | STLQERLPGFIIRD | 1338 |
| TR A0A0S4GAY8 A0A0S4GAY8_9VIRU | SALQEKLPGFIIRD | 1338 |
| TR I1Y9U5 I1Y9U5_9VIRU         | SALQEKLPGFIIRD | 1338 |
| TR A0A7G3W8V5 A0A7G3W8V5_9VIRU | SALQEKLPGFIIRD | 1338 |
| TR A0A0S4GA48 A0A0S4GA48_9VIRU | SALQEKLPGFIIRD | 1338 |
| TR A0A7S5WLW9 A0A7S5WLW9_9VIRU | EKYMSSPEATLLMD | 1270 |
| TR A0A7S5WLW9 A0A7S5WLW9_9VIRU | RNYQQAEGSVLLLD | 1208 |
| TR A0A2Z5WAE4 A0A2Z5WAE4_9VIRU | QELGKRFPGIILKD | 1311 |
| TR A0A7S5WLX4 A0A7S5WLX4_9VIRU | ENYQQAEGSVLLLD | 1316 |
| TR A0A3G8GGF4 A0A3G8GGF4_9VIRU | QELGKRFPGIILKD | 1311 |
| TR A0A515KU26 A0A515KU26_9VIRU | DNYLSSQEAILLMD | 1270 |
| TR A0A7S5WLW5 A0A7S5WLW5_9VIRU | RNYQQAEGSVLLLD | 1082 |
| TR A0A0M5KKP5 A0A0M5KKP5_9VIRU | RNYQQTEGSVLLLD | 1082 |
| TR A0A2Z1Q3S4 A0A2Z1Q3S4_9VIRU | QTLQEEFPGFLIRD | 1355 |
| TR A0A514D1L9 A0A514D1L9_9VIRU | -----          |      |
| TR A0A2Z1Q375 A0A2Z1Q375_9VIRU | RRFLDA-LHVILSD | 1362 |
| TR D0TZ30 D0TZ30_9VIRU         | QVLDEFAPNFIIRD | 1311 |
| TR A0A1B4ZA62 A0A1B4ZA62_9VIRU | QILQEEFPGFVIRD | 1354 |
